# Supplementary material for: An Unbiased Oncology Compound Screen to Identify Novel Combination Strategies
Source: Oxford University Press journal article supplement (doi:10.1158/1535-7163.mct-15-0843), 2016-03-16
Supplement: 15357163mct150843-sup-156849_1_supp_0_v3qfqn.docx [file 15357163mct150843-sup-156849_1_supp_0_v3qfqn.docx]

Supplementary Table 1. Thirty-nine cell lines used in combination screen. RAS mutation/signature does not predict response to mTOR/Wee1 combination.

Supplementary Figure 1. Hierarchical clustering of response to single agent treatments. Hierarchical clustering was performed on the response data across the cell line panel to the single agent treatments. Drugs with similar mechanisms of action clustered together.

Supplementary Figure 2. Experiment that was used to select drug concentrations for combination screen. We ran 8 titration point curves (shown in gray) and then picked 4 concentration points that cover best the response curve for all cell lines (shown in red). The first point is the top plateau, the last is the bottom plateau and the other 2 are in between.

Supplementary Data. Response data for all single agent and combination treatments in the screen. Response is represented as fractional viability.
