# Supplementary material for: An Unbiased Oncology Compound Screen to Identify Novel Combination Strategies
Source: Oxford University Press journal article supplement (doi:10.1158/1535-7163.mct-15-0843), 2016-03-16
Supplement: 15357163mct150843-sup-156849_1_supp_0_w2lh45.xlsx [file 15357163mct150843-sup-156849_1_supp_0_w2lh45.xlsx]

## Sheet: single agent response
BatchID	cell_line	drug_name	Drug_concentration (µM)	viability1	viability2	viability3	viability4	viability5	viability6	mu/muMax	X/X0
1	A2058	5-FU	0.0045	0.90804	1.00986	1.01038	1.18202	0.95803	1.03229	1.00511	1.00711
1	A2058	5-FU	0.014	0.92227	1.08071	0.97098	1.06446	1.03962	1.16256	1.02575	1.03634
1	A2058	5-FU	0.04	0.97264	1.11151	1.05546	1.10022	1.03573	1.06873	1.03058	1.0433
1	A2058	5-FU	0.12	0.92836	1.07104	0.95915	1.10822	1.04019	1.14458	1.02747	1.03882
1	A2058	5-FU	0.37	1.02036	1.11621	1.02111	1.0539	0.95623	1.02383	1.01128	1.01576
1	A2058	5-FU	1.1	0.96456	0.98167	0.95253	0.98887	0.88472	1.0134	0.98616	0.981
1	A2058	5-FU	3.4	0.71601	0.86389	0.7657	0.75393	0.79795	0.81468	0.87506	0.84097
1	A2058	5-FU	10	0.55264	0.6407	0.56285	0.53192	0.5363	0.5928	0.70361	0.66306
1	A2780	5-FU	0.0045	0.96434	0.93806	1.10537	0.9877	1.03107	1.00831	0.99923	0.99893
1	A2780	5-FU	0.014	1.08052	1.04147	0.98719	0.96023	1.0682	1.04127	1.01574	1.02206
1	A2780	5-FU	0.04	0.96602	1.03332	1.0132	0.9796	0.9968	0.97294	0.99539	0.99363
1	A2780	5-FU	0.12	1.02975	0.98721	0.94216	0.96993	1.02643	1.09401	1.00264	1.00367
1	A2780	5-FU	0.37	0.98426	0.90447	0.95339	0.88867	0.89702	0.90237	0.96056	0.94679
1	A2780	5-FU	1.1	0.60783	0.52073	0.6545	0.57057	0.7859	0.71443	0.8213	0.78057
1	A2780	5-FU	3.4	0.24462	0.2215	0.24002	0.21317	0.22789	0.19657	0.42022	0.44765
1	A2780	5-FU	10	0.14038	0.13222	0.12823	0.14404	0.13199	0.1247	0.21394	0.33631
1	A375	5-FU	0.0045	0.94226	0.75253	0.97528	1.07299	1.045	0.95249	0.98242	0.97592
1	A375	5-FU	0.014	0.94023	0.83491	0.95002	0.97738	0.9994	1.04631	0.98233	0.9758
1	A375	5-FU	0.04	0.91003	0.83445	0.89634	1.10782	0.94379	1.00143	0.96373	0.95096
1	A375	5-FU	0.12	0.93178	0.83879	0.94629	0.97073	1.0614	0.93838	0.97162	0.96142
1	A375	5-FU	0.37	1.18412	1.15273	1.08027	1.11127	0.88874	0.92366	1.0437	1.06245
1	A375	5-FU	1.1	1.14274	1.10628	1.15234	1.13252	0.95386	0.87922	1.0539	1.07758
1	A375	5-FU	3.4	1.1238	1.07329	1.05894	1.07486	0.90019	0.85198	1.03059	1.04332
1	A375	5-FU	10	0.61421	0.57128	0.63106	0.53425	0.47738	0.52177	0.71672	0.67522
1	A427	5-FU	0.0045	0.91191	1.02331	0.87176	NULL	NULL	NULL	0.95012	0.93319
1	A427	5-FU	0.014	0.84928	0.91261	0.79243	NULL	NULL	NULL	0.91163	0.8847
1	A427	5-FU	0.04	0.85553	1.18365	0.83193	NULL	NULL	NULL	0.91559	0.88957
1	A427	5-FU	0.12	0.86356	0.92949	0.91019	NULL	NULL	NULL	0.9491	0.93187
1	A427	5-FU	0.37	1.13176	0.98364	0.97593	NULL	NULL	NULL	0.99108	0.98771
1	A427	5-FU	1.1	0.96257	0.93214	0.85927	NULL	NULL	NULL	0.96199	0.94867
1	A427	5-FU	3.4	0.73349	0.54376	0.65432	NULL	NULL	NULL	0.77055	0.72754
1	A427	5-FU	10	0.2689	0.26312	0.25787	NULL	NULL	NULL	0.27775	0.36742
1	CAOV3	5-FU	0.0045	0.98299	0.94817	1.08651	0.94721	1.17812	1.06395	1.03022	1.04278
1	CAOV3	5-FU	0.014	0.97743	0.91449	1.22587	1.04428	1.138	0.98613	1.01966	1.02763
1	CAOV3	5-FU	0.04	1.15542	0.9841	1.21744	0.91507	1.25964	0.99891	1.09683	1.14366
1	CAOV3	5-FU	0.12	1.08678	1.1359	0.95301	0.95701	1.05059	1.05774	1.06871	1.09994
1	CAOV3	5-FU	0.37	0.9666	1.06196	1.11286	0.85575	1.05706	1.1557	1.0753	1.11003
1	CAOV3	5-FU	1.1	1.04595	1.11681	0.93142	0.80737	1.3052	1.13594	1.10192	1.15176
1	CAOV3	5-FU	3.4	0.87286	0.7751	0.63683	0.75659	0.73365	0.72792	0.61674	0.58783
1	CAOV3	5-FU	10	0.51692	0.60871	0.43093	0.5185	0.5216	0.56122	0.14827	0.30705
1	COLO320DM	5-FU	0.0045	0.84322	0.95001	1.1168	1.04684	1.10232	1.04245	1.01576	1.02209
1	COLO320DM	5-FU	0.014	0.86888	0.93238	0.96852	0.84664	0.79481	1.13273	0.96224	0.949
1	COLO320DM	5-FU	0.04	1.06657	1.02237	1.06445	0.83923	1.20883	1.26568	1.02289	1.03224
1	COLO320DM	5-FU	0.12	0.92811	0.87894	0.90017	0.90388	0.98518	1.09369	0.96834	0.95706
1	COLO320DM	5-FU	0.37	0.79969	0.86621	0.91921	0.72804	0.8643	0.71354	0.93363	0.9121
1	COLO320DM	5-FU	1.1	0.59855	0.61697	0.57755	0.6225	0.54579	0.46884	0.80843	0.76677
1	COLO320DM	5-FU	3.4	0.42775	0.44717	0.45403	0.39837	0.44939	0.48865	0.71051	0.66944
1	COLO320DM	5-FU	10	0.42103	0.43532	0.40686	0.38804	0.28462	0.33204	0.66708	0.63032
1	DLD1	5-FU	0.0045	0.89606	0.8736	1.02317	1.09027	1.034	1.04756	1.01087	1.01518
1	DLD1	5-FU	0.014	0.99881	0.90383	0.98307	0.98681	1.0561	0.87606	0.99415	0.99192
1	DLD1	5-FU	0.04	0.94941	0.90592	1.09587	0.92687	0.97276	1.01667	0.9847	0.97901
1	DLD1	5-FU	0.12	0.94816	0.90083	1.00299	1.10908	1.00135	0.93678	0.99014	0.98642
1	DLD1	5-FU	0.37	1.13753	1.06587	0.96866	0.95501	0.8959	0.96211	0.98641	0.98134
1	DLD1	5-FU	1.1	0.79151	0.92143	0.90096	0.76316	0.8167	0.70352	0.91592	0.88998
1	DLD1	5-FU	3.4	0.78057	0.64493	0.53972	0.5546	0.58308	0.61675	0.80296	0.76097
1	DLD1	5-FU	10	0.32226	0.45399	0.3631	0.42015	0.27843	0.41645	0.63667	0.6043
1	EFM192B	5-FU	0.0045	0.97584	0.98839	1.06827	1.04669	1.02459	0.89926	1.00587	1.00817
1	EFM192B	5-FU	0.014	0.96244	0.99041	0.80823	1.04827	1.041	0.99785	0.99466	0.99262
1	EFM192B	5-FU	0.04	1.05169	1.0341	1.03616	1.10202	0.9191	0.92793	1.03133	1.04439
1	EFM192B	5-FU	0.12	1.02104	1.03859	0.75857	0.84725	0.95691	0.95407	0.95868	0.94433
1	EFM192B	5-FU	0.37	0.96642	0.95649	0.89819	0.92322	1.05151	0.77363	0.9437	0.92492
1	EFM192B	5-FU	1.1	0.86165	0.82324	0.84152	0.74415	0.90153	0.80572	0.8335	0.79388
1	EFM192B	5-FU	3.4	0.76831	1.10406	0.68935	0.67847	0.67488	0.70766	0.67438	0.63673
1	EFM192B	5-FU	10	0.65487	0.71457	0.56979	0.64797	0.71173	0.56696	0.61104	0.58321
1	ES2	5-FU	0.0045	0.85176	0.77262	1.05916	0.9319	0.84895	0.87417	0.92785	0.90482
1	ES2	5-FU	0.014	1.03449	0.88295	0.80045	0.82383	0.92977	1.01349	0.95187	0.93545
1	ES2	5-FU	0.04	0.9165	0.89987	1.07206	1.03288	0.95521	1.02848	0.99599	0.99446
1	ES2	5-FU	0.12	1.049	0.88297	0.83133	0.79668	1.00226	1.02872	0.97107	0.96069
1	ES2	5-FU	0.37	1.15024	1.04086	0.95905	1.05627	0.95962	0.95029	1.00012	1.00017
1	ES2	5-FU	1.1	0.94603	0.90975	0.95996	0.95209	0.9747	0.77519	0.9744	0.96513
1	ES2	5-FU	3.4	0.78496	0.81591	0.81712	0.77692	0.68307	0.72907	0.87895	0.84551
1	ES2	5-FU	10	0.57336	0.53937	0.52802	0.5297	0.52714	0.48641	0.68813	0.64899
1	HCT116	5-FU	0.0045	0.85339	0.8468	1.02876	1.2128	0.99086	1.11274	1.00482	1.0067
1	HCT116	5-FU	0.014	0.88511	0.85115	0.87978	1.00691	0.96783	0.89055	0.94127	0.92181
1	HCT116	5-FU	0.04	0.92603	0.87963	0.95022	1.00439	0.98685	0.90581	0.96847	0.95723
1	HCT116	5-FU	0.12	0.91148	0.86586	0.91444	0.98271	1.01283	0.89426	0.95505	0.93959
1	HCT116	5-FU	0.37	1.05087	1.08445	0.96364	0.97385	0.92788	0.82414	0.98432	0.9785
1	HCT116	5-FU	1.1	0.98475	0.91754	0.96655	1.04123	0.81549	0.79583	0.97053	0.95997
1	HCT116	5-FU	3.4	0.77441	0.82847	0.81425	0.70674	0.77488	0.78929	0.87867	0.84519
1	HCT116	5-FU	10	0.27639	0.32411	0.27565	0.27639	0.27438	0.27257	0.36454	0.4144
1	HT144	5-FU	0.0045	0.97998	0.95926	0.97948	0.96311	0.94937	0.94982	0.97102	0.96062
1	HT144	5-FU	0.014	0.95777	0.97064	0.95302	0.97566	0.98428	1.00209	0.98008	0.97276
1	HT144	5-FU	0.04	0.97554	0.93749	0.90053	0.96848	0.85818	0.93819	0.95302	0.93695
1	HT144	5-FU	0.12	0.98014	0.96678	1.00799	0.97773	0.98365	1.01294	0.98662	0.98162
1	HT144	5-FU	0.37	1.08882	1.05661	1.05199	1.01335	0.89409	0.94223	1.02353	1.03316
1	HT144	5-FU	1.1	0.99129	0.9593	0.9111	0.92654	0.84132	0.87614	0.93802	0.91767
1	HT144	5-FU	3.4	0.84127	0.89372	0.89683	0.76251	0.7519	0.7259	0.83838	0.79927
1	HT144	5-FU	10	0.7676	0.6867	0.68206	0.60669	0.64737	0.70484	0.72238	0.68054
1	HT29	5-FU	0.0045	0.92698	0.96347	1.03496	1.07193	1.05731	1.00517	1.00868	1.01211
1	HT29	5-FU	0.014	0.98152	0.98116	1.02377	1.04194	0.94692	0.97903	0.99176	0.98864
1	HT29	5-FU	0.04	0.95868	1.01818	1.02987	1.05939	0.991	1.02669	1.0097	1.01354
1	HT29	5-FU	0.12	0.96447	0.98517	1.10366	1.08177	0.84777	0.90199	0.98885	0.98466
1	HT29	5-FU	0.37	1.00494	1.11421	0.9063	0.91827	0.93236	0.96852	0.97778	0.96967
1	HT29	5-FU	1.1	0.86392	0.86188	0.69505	0.72412	0.91213	0.9462	0.93553	0.9145
1	HT29	5-FU	3.4	0.50354	0.5912	0.50424	0.53196	0.60038	0.60053	0.74772	0.70488
1	HT29	5-FU	10	0.34038	0.33202	0.31554	0.30281	0.2857	0.39637	0.50695	0.50484
1	KPL1	5-FU	0.0045	0.90838	0.83333	0.95779	0.90879	1.19271	1.16103	0.95254	0.93632
1	KPL1	5-FU	0.014	0.99727	0.74783	0.92829	0.92134	1.05406	1.2322	0.97392	0.96449
1	KPL1	5-FU	0.04	1.00181	0.89833	1.14224	1.1044	1.25284	1.20067	1.07994	1.11719
1	KPL1	5-FU	0.12	0.93402	0.87996	0.88921	0.91381	1.05084	1.22507	0.9456	0.92736
1	KPL1	5-FU	0.37	0.81929	0.95677	0.88474	0.91387	0.82849	0.85261	0.90321	0.87443
1	KPL1	5-FU	1.1	0.8501	0.92568	0.83343	0.95321	0.84485	0.71517	0.88624	0.8541
1	KPL1	5-FU	3.4	0.87136	0.84743	0.66832	0.74167	0.68699	0.6209	0.76874	0.72572
1	KPL1	5-FU	10	0.56879	0.55662	0.53947	0.49977	0.49024	0.53701	0.57416	0.55414
1	LNCAP	5-FU	0.0045	0.91614	0.94992	0.68969	1.30079	1.42522	1.18798	1.04086	1.05828
1	LNCAP	5-FU	0.014	0.8625	0.85402	0.79635	0.7214	0.90924	0.93872	0.90634	0.87824
1	LNCAP	5-FU	0.04	0.79548	0.89091	1.26934	1.28758	0.86399	0.92357	0.94035	0.92063
1	LNCAP	5-FU	0.12	0.64949	0.5672	0.65675	1.05644	0.8332	1.13368	0.81959	0.77872
1	LNCAP	5-FU	0.37	1.2666	1.04561	0.70462	0.95061	1.07365	1.03501	1.02422	1.03415
1	LNCAP	5-FU	1.1	1.36979	0.85349	0.72629	0.56231	0.76622	0.93821	0.87076	0.83597
1	LNCAP	5-FU	3.4	0.85709	0.50924	0.61431	0.36729	0.56498	0.5728	0.65434	0.61929
1	LNCAP	5-FU	10	0.19785	0.24798	0.39452	0.29504	0.48243	0.26181	0.21647	0.3375
1	LOVO	5-FU	0.0045	0.80333	0.94246	0.90695	1.09817	0.92783	1.09527	0.96772	0.95624
1	LOVO	5-FU	0.014	0.86078	1.10187	0.95754	0.87391	0.91137	0.79303	0.94534	0.92702
1	LOVO	5-FU	0.04	1.02299	0.85533	0.98115	0.99099	1.09772	1.13936	1.00335	1.00465
1	LOVO	5-FU	0.12	1.0152	1.25691	1.0848	1.0052	0.70488	1.18981	1.02348	1.03309
1	LOVO	5-FU	0.37	0.84192	1.21613	0.78751	0.85629	0.93319	1.18175	0.94647	0.92848
1	LOVO	5-FU	1.1	0.6436	1.18284	0.99003	1.21539	0.94722	0.76216	0.98465	0.97895
1	LOVO	5-FU	3.4	0.67407	0.53973	0.84369	0.55672	0.84518	0.87468	0.8672	0.83185
1	LOVO	5-FU	10	0.45447	0.47138	0.38354	0.28921	0.37013	0.52927	0.58131	0.55966
1	MDAMB436	5-FU	0.0045	0.97756	0.95133	1.02525	0.94189	1.09383	1.18727	1.00078	1.00108
1	MDAMB436	5-FU	0.014	0.98271	0.99524	0.85664	0.90589	1.04669	1.11485	0.99379	0.99143
1	MDAMB436	5-FU	0.04	1.02465	0.99969	0.97364	1.06851	1.10964	1.00945	1.00946	1.0132
1	MDAMB436	5-FU	0.12	1.09041	0.94377	0.78424	0.76986	1.0561	1.03232	0.99326	0.9907
1	MDAMB436	5-FU	0.37	0.94284	0.98713	0.94654	0.89095	0.7989	0.80213	0.95144	0.9349
1	MDAMB436	5-FU	1.1	0.82279	0.73074	0.77333	0.7267	0.76872	0.79601	0.85445	0.81728
1	MDAMB436	5-FU	3.4	0.65464	0.60287	0.6528	0.62111	0.56458	0.57882	0.72514	0.68315
1	MDAMB436	5-FU	10	0.56991	0.57456	0.57446	0.5623	0.51345	0.51942	0.68152	0.64307
1	MSTO	5-FU	0.0045	0.70568	0.8845	0.74173	1.11195	1.00966	1.25218	0.97714	0.96881
1	MSTO	5-FU	0.014	0.6872	0.74391	0.57397	0.83946	0.94573	1.23125	0.9018	0.87273
1	MSTO	5-FU	0.04	0.65155	0.72741	0.97658	0.67419	0.88064	1.12408	0.9083	0.88063
1	MSTO	5-FU	0.12	0.65858	0.71158	0.60772	0.77167	1.03887	1.41978	0.87434	0.84013
1	MSTO	5-FU	0.37	0.9781	1.23123	1.05159	1.30209	1.09972	0.97586	1.03066	1.04342
1	MSTO	5-FU	1.1	0.98562	1.05596	0.8938	0.183	0.76954	0.86682	0.94641	0.9284
1	MSTO	5-FU	3.4	0.42391	0.82146	0.53288	0.48063	0.65134	0.74116	0.77969	0.73682
1	MSTO	5-FU	10	0.23522	0.24763	0.28237	0.29071	0.28534	0.32295	0.4706	0.48003
1	NCIH1650	5-FU	0.0045	0.93242	1.02207	1.00708	1.00648	1.02762	1.03062	1.01118	1.01562
1	NCIH1650	5-FU	0.014	1.0142	1.00991	1.0051	0.98407	0.94097	0.99335	0.9994	0.99917
1	NCIH1650	5-FU	0.04	0.96801	1.08289	0.98821	1.13969	1.0365	0.99224	1.01102	1.01539
1	NCIH1650	5-FU	0.12	0.99905	1.09348	1.01518	0.97548	0.96478	0.88766	0.99009	0.98636
1	NCIH1650	5-FU	0.37	0.94338	0.89211	0.95704	0.93958	0.98231	0.80384	0.95341	0.93745
1	NCIH1650	5-FU	1.1	0.95744	0.88072	1.00846	0.81308	0.93311	0.92178	0.94181	0.9225
1	NCIH1650	5-FU	3.4	0.83761	0.70126	0.84197	0.72603	0.83467	0.78707	0.83804	0.7989
1	NCIH1650	5-FU	10	0.75698	0.71851	0.73047	0.5876	0.6755	0.63438	0.72113	0.67937
1	NCIH2122	5-FU	0.0045	1.06821	1.03037	1.02512	1.10682	1.09129	1.07414	1.03106	1.044
1	NCIH2122	5-FU	0.014	1.0522	1.01375	0.99849	1.00638	0.91124	0.94914	1.0011	1.00153
1	NCIH2122	5-FU	0.04	1.13151	0.99086	1.04968	1.01214	0.98962	1.0093	1.00482	1.0067
1	NCIH2122	5-FU	0.12	0.99719	0.97555	0.96769	0.92163	0.87642	0.8973	0.97428	0.96497
1	NCIH2122	5-FU	0.37	0.65187	0.67151	0.5609	0.54037	0.61429	0.57474	0.76509	0.72205
1	NCIH2122	5-FU	1.1	0.36649	0.3696	0.34027	0.29674	0.38599	0.28729	0.5301	0.52131
1	NCIH2122	5-FU	3.4	0.20601	0.20165	0.18793	0.17301	0.20203	0.17114	0.26104	0.35901
1	NCIH2122	5-FU	10	0.16287	0.14642	0.17154	0.15132	0.15372	0.14454	0.15054	0.30802
1	NCIH23	5-FU	0.0045	0.85518	1.10777	1.11013	1.01985	0.98899	1.12011	1.02899	1.04101
1	NCIH23	5-FU	0.014	0.95669	0.9644	1.0658	0.99213	1.13128	1.08337	1.01339	1.01874
1	NCIH23	5-FU	0.04	0.89507	0.91348	1.10433	0.89553	1.05403	1.00831	0.98131	0.97442
1	NCIH23	5-FU	0.12	1.0537	1.08731	1.03323	0.88313	0.98508	1.03346	1.01538	1.02155
1	NCIH23	5-FU	0.37	0.93059	0.87581	0.78286	0.79622	0.90289	0.97829	0.94504	0.92664
1	NCIH23	5-FU	1.1	0.88667	0.79329	0.8423	0.72908	0.86498	0.73134	0.90572	0.87748
1	NCIH23	5-FU	3.4	0.68107	0.60613	0.67602	0.53689	0.51902	0.59072	0.75933	0.71631
1	NCIH23	5-FU	10	0.46763	0.48911	0.39802	0.36265	0.44608	0.41127	0.60296	0.57671
1	NCIH460	5-FU	0.0045	0.8521	0.81488	0.94531	0.9527	0.90889	0.85684	0.91784	0.89235
1	NCIH460	5-FU	0.014	0.91504	0.8373	0.98802	1.02646	1.03796	0.94336	0.97698	0.96859
1	NCIH460	5-FU	0.04	0.85793	0.87121	0.91495	0.87932	0.9156	0.93366	0.92841	0.90552
1	NCIH460	5-FU	0.12	0.95659	0.86725	0.88842	0.97424	1.01978	1.04417	0.97679	0.96834
1	NCIH460	5-FU	0.37	1.01791	1.05116	0.92441	0.94658	0.83514	0.83924	0.95603	0.94087
1	NCIH460	5-FU	1.1	0.91024	0.87097	0.8794	0.88974	0.87445	0.89508	0.91911	0.89392
1	NCIH460	5-FU	3.4	0.46477	0.46443	0.4457	0.4358	0.48128	0.45015	0.484	0.48903
1	NCIH460	5-FU	10	0.38651	0.35354	0.34638	0.30134	0.3693	0.35648	0.31704	0.38799
1	NCIH520	5-FU	0.0045	1.0413	1.05782	1.31176	1.09197	1.10596	0.75285	1.02853	1.04034
1	NCIH520	5-FU	0.014	0.8849	1.00651	1.11821	0.93245	0.92318	0.92456	0.9707	0.9602
1	NCIH520	5-FU	0.04	0.81224	0.99287	1.26123	0.73147	1.02808	0.99923	0.99844	0.99784
1	NCIH520	5-FU	0.12	0.96887	0.91032	1.11871	0.89696	0.9137	1.00819	0.9761	0.96741
1	NCIH520	5-FU	0.37	1.0494	0.8846	1.03586	0.9108	0.91992	0.84652	0.96507	0.95273
1	NCIH520	5-FU	1.1	0.59155	0.66716	0.73526	0.7424	0.89495	0.82827	0.88043	0.84725
1	NCIH520	5-FU	3.4	0.47156	0.5023	0.54535	0.46477	0.41397	0.4712	0.70291	0.66242
1	NCIH520	5-FU	10	0.47298	0.42816	0.34817	0.32681	0.39729	0.39033	0.63189	0.60031
1	OCUBM	5-FU	0.0045	0.90607	0.90571	1.07472	1.06318	1.1613	0.92778	0.99489	0.99294
1	OCUBM	5-FU	0.014	0.89339	0.95539	1.02425	0.7828	1.05178	0.94526	0.94254	0.92343
1	OCUBM	5-FU	0.04	0.92163	0.94088	0.86696	1.07382	1.00507	0.94504	0.93377	0.91227
1	OCUBM	5-FU	0.12	0.92207	0.95623	1.01582	0.85121	0.94181	1.08043	0.94099	0.92145
1	OCUBM	5-FU	0.37	1.12493	1.14622	1.10735	0.89525	0.90539	0.93606	1.02421	1.03413
1	OCUBM	5-FU	1.1	1.04011	0.89095	0.92651	0.88324	0.73888	0.76915	0.86491	0.82922
1	OCUBM	5-FU	3.4	0.84821	0.71584	0.79041	0.75171	0.62965	0.65628	0.65092	0.61636
1	OCUBM	5-FU	10	0.6519	0.64592	0.60851	0.61629	0.55206	0.58254	0.44703	0.4646
1	OV90	5-FU	0.0045	0.82462	0.90343	1.07644	1.01275	0.82156	0.74847	0.88432	0.85183
1	OV90	5-FU	0.014	0.90048	0.88737	0.89207	1.00979	0.96976	1.13019	0.94691	0.92904
1	OV90	5-FU	0.04	0.86988	0.9374	0.91614	0.94531	0.88438	1.05203	0.93981	0.91995
1	OV90	5-FU	0.12	0.89564	0.98329	0.91186	0.96744	0.9369	0.95514	0.95608	0.94093
1	OV90	5-FU	0.37	1.08919	0.94005	0.93885	0.98541	1.00318	0.8805	0.96994	0.95918
1	OV90	5-FU	1.1	0.87158	0.90923	0.94754	0.99576	0.97302	0.9908	0.96792	0.9565
1	OV90	5-FU	3.4	1.07334	1.01266	0.87046	0.80277	0.93605	0.90062	0.93258	0.91077
1	OV90	5-FU	10	0.83928	0.7852	0.79645	0.78174	0.81341	0.86061	0.82825	0.78813
1	OVCAR3	5-FU	0.0045	0.99159	1.02689	1.16485	0.9938	1.16179	1.06202	1.04275	1.06106
1	OVCAR3	5-FU	0.014	1.00684	0.95337	0.91139	0.96451	0.96942	1.11022	0.96697	0.95524
1	OVCAR3	5-FU	0.04	1.04066	1.05826	1.12553	1.033	1.04458	1.03137	1.04103	1.05853
1	OVCAR3	5-FU	0.12	0.88834	0.93035	1.07447	0.99878	0.90243	1.06591	0.96453	0.95202
1	OVCAR3	5-FU	0.37	0.87326	0.87305	0.86007	0.94103	0.81232	0.7757	0.8592	0.82268
1	OVCAR3	5-FU	1.1	0.65967	0.6776	0.73694	0.70099	0.71145	0.80918	0.65806	0.62249
1	OVCAR3	5-FU	3.4	0.5677	0.57012	0.67377	0.59707	0.68398	0.61335	0.50632	0.5044
1	OVCAR3	5-FU	10	0.64233	0.58597	0.51659	0.54626	0.57157	0.55039	0.43172	0.45484
1	PA1	5-FU	0.0045	0.79403	0.83698	0.96977	1.28315	0.98711	1.02349	0.98985	0.98603
1	PA1	5-FU	0.014	1.06962	0.8399	0.93499	0.96908	1.18757	1.16041	1.00893	1.01246
1	PA1	5-FU	0.04	0.90445	0.81727	1.01498	0.9208	0.83683	0.88633	0.94854	0.93115
1	PA1	5-FU	0.12	0.9365	0.82527	0.96246	0.89842	0.96862	1.1316	0.97586	0.96709
1	PA1	5-FU	0.37	0.99828	1.00403	0.99305	1.05371	0.75705	0.76054	0.99797	0.99719
1	PA1	5-FU	1.1	0.55403	0.59844	0.84409	0.60356	0.58509	0.58153	0.75564	0.71266
1	PA1	5-FU	3.4	0.3552	0.39059	0.30178	0.19685	0.21667	0.17141	0.3712	0.41824
1	PA1	5-FU	10	0.12769	0.18022	0.09616	0.07002	0.13453	0.10677	0.00161	0.25056
1	RKO	5-FU	0.0045	0.82993	0.7276	1.04085	1.04501	1.03458	1.08714	1.01705	1.02392
1	RKO	5-FU	0.014	0.80944	0.85487	0.90334	0.80599	1.13091	1.02468	0.94063	0.92099
1	RKO	5-FU	0.04	0.84118	0.77734	0.97802	1.04387	1.092	1.11788	1.00501	1.00697
1	RKO	5-FU	0.12	0.82029	0.79131	0.71751	0.79157	1.09621	1.04774	0.90059	0.87126
1	RKO	5-FU	0.37	1.05729	0.98238	0.8508	0.89591	0.65536	0.71682	0.93761	0.91714
1	RKO	5-FU	1.1	0.76626	0.81391	0.7952	0.81273	0.65554	0.59816	0.88596	0.85377
1	RKO	5-FU	3.4	0.53643	0.51482	0.52255	0.48916	0.45367	0.43924	0.68248	0.64392
1	RKO	5-FU	10	0.53837	0.59314	0.55439	0.49731	0.49242	0.48042	0.6968	0.65683
1	RPMI7951	5-FU	0.0045	0.94201	0.98935	1.05882	1.05376	1.0434	1.05843	1.04624	1.0662
1	RPMI7951	5-FU	0.014	0.93522	1.0243	1.03056	0.99949	1.02169	1.0472	1.02216	1.0312
1	RPMI7951	5-FU	0.04	0.97796	0.98318	1.05312	1.0844	1.04791	1.03712	1.04058	1.05787
1	RPMI7951	5-FU	0.12	0.96433	1.03764	0.99286	1.03322	1.05692	0.95206	1.01263	1.01766
1	RPMI7951	5-FU	0.37	0.9431	0.98669	1.00236	0.90624	0.87403	0.91169	0.92652	0.90315
1	RPMI7951	5-FU	1.1	0.79744	0.87766	0.89702	0.93507	0.89145	0.88194	0.88277	0.85
1	RPMI7951	5-FU	3.4	0.8006	0.76815	0.68506	0.68044	0.67729	0.73849	0.66855	0.63161
1	RPMI7951	5-FU	10	0.61522	0.61947	0.64186	0.61691	0.5944	0.60751	0.52777	0.51962
1	SKMEL30	5-FU	0.0045	0.97889	0.858	0.96963	0.99377	1.25821	1.20162	0.99338	0.99086
1	SKMEL30	5-FU	0.014	0.91232	0.94571	0.78479	0.94126	1.26391	1.08941	0.97202	0.96195
1	SKMEL30	5-FU	0.04	0.9304	0.90111	0.99085	1.10598	1.28941	1.23337	1.02274	1.03203
1	SKMEL30	5-FU	0.12	0.96048	0.87992	0.68676	0.85042	1.33221	1.06771	0.96001	0.94607
1	SKMEL30	5-FU	0.37	1.20018	1.16744	1.04218	1.13487	0.86013	0.84741	1.0408	1.05819
1	SKMEL30	5-FU	1.1	1.09249	1.0334	1.0892	0.96671	0.83712	0.80526	1.00002	1.00003
1	SKMEL30	5-FU	3.4	0.96532	0.74437	0.74591	0.71323	0.6727	0.65401	0.84786	0.80985
1	SKMEL30	5-FU	10	0.50314	0.54881	0.47468	0.54237	0.53913	0.48316	0.68657	0.64758
1	SKMES1	5-FU	0.0045	0.97812	0.96334	0.96541	1.05382	0.94876	1.01096	0.98474	0.97907
1	SKMES1	5-FU	0.014	0.89182	1.06339	0.93399	0.92533	1.02784	1.02474	0.9889	0.98473
1	SKMES1	5-FU	0.04	0.90175	0.98519	0.91792	0.91672	0.87983	1.12748	0.95404	0.93827
1	SKMES1	5-FU	0.12	0.89864	0.97486	0.86375	0.97699	0.89267	1.12542	0.9652	0.9529
1	SKMES1	5-FU	0.37	0.9357	0.95956	0.85675	0.8293	0.92006	0.96966	0.96014	0.94624
1	SKMES1	5-FU	1.1	0.68752	0.74229	0.74382	0.67839	0.69402	0.72469	0.81712	0.77606
1	SKMES1	5-FU	3.4	0.5859	0.63019	0.59999	0.59076	0.56902	0.60402	0.72384	0.68192
1	SKMES1	5-FU	10	0.59268	0.61082	0.51838	0.56181	0.55554	0.55214	0.68995	0.65063
1	SKOV3	5-FU	0.0045	1.07738	0.94066	1.15013	NULL	NULL	NULL	1.04271	1.061
1	SKOV3	5-FU	0.014	0.96904	1.03045	1.06561	NULL	NULL	NULL	1.01719	1.02412
1	SKOV3	5-FU	0.04	0.99116	1.10605	1.0764	NULL	NULL	NULL	1.04219	1.06023
1	SKOV3	5-FU	0.12	0.98741	1.1466	0.89069	NULL	NULL	NULL	0.99274	0.98999
1	SKOV3	5-FU	0.37	1.14436	0.96899	0.96964	NULL	NULL	NULL	0.98233	0.9758
1	SKOV3	5-FU	1.1	0.89675	1.0015	0.94465	NULL	NULL	NULL	0.96737	0.95577
1	SKOV3	5-FU	3.4	0.87181	0.9087	0.95917	NULL	NULL	NULL	0.94514	0.92677
1	SKOV3	5-FU	10	0.77356	0.63329	0.57666	NULL	NULL	NULL	0.73822	0.69565
1	SW620	5-FU	0.0045	0.90368	0.94346	1.10661	1.1196	1.09304	1.10154	1.03698	1.0526
1	SW620	5-FU	0.014	0.90054	0.88645	0.90159	0.87638	1.00152	1.13723	0.95851	0.94411
1	SW620	5-FU	0.04	0.92293	0.89916	1.09755	1.13019	1.03941	1.13385	1.02638	1.03725
1	SW620	5-FU	0.12	0.90116	0.90813	0.87515	1.00261	1.08158	1.10261	0.98182	0.97511
1	SW620	5-FU	0.37	0.98966	1.00929	1.05149	0.90693	0.90937	0.80835	0.97936	0.97179
1	SW620	5-FU	1.1	0.91563	1.03186	0.91293	0.90633	0.91456	0.99142	0.96466	0.95219
1	SW620	5-FU	3.4	0.8118	0.77287	0.81276	0.74887	0.72712	0.78705	0.90102	0.87178
1	SW620	5-FU	10	0.49456	0.49698	0.4818	0.42648	0.45479	0.44095	0.69784	0.65778
1	SW837	5-FU	0.0045	1.45899	1.00016	0.94284	1.35861	0.97536	0.99056	0.99698	0.99582
1	SW837	5-FU	0.014	1.02143	0.83405	0.86641	0.71537	1.01119	0.92252	0.92761	0.90452
1	SW837	5-FU	0.04	1.29253	0.99891	1.23681	0.86481	0.91782	0.96043	0.98667	0.98169
1	SW837	5-FU	0.12	1.10521	1.29697	1.03225	1.14287	1.0115	0.95769	1.04315	1.06164
1	SW837	5-FU	0.37	1.02518	0.90762	0.84878	0.9505	0.78319	0.91961	0.94136	0.92192
1	SW837	5-FU	1.1	0.79332	0.85199	0.78904	0.59524	0.5129	0.70381	0.81017	0.76862
1	SW837	5-FU	3.4	0.58495	0.56222	0.56894	0.55284	0.40748	0.62784	0.63008	0.59881
1	SW837	5-FU	10	0.42281	0.70116	0.49471	0.36741	0.46402	0.40217	0.47213	0.48105
1	T47D	5-FU	0.0045	0.77332	1.01896	1.19658	0.88347	0.98254	1.34109	1.00095	1.00132
1	T47D	5-FU	0.014	0.83337	1.0689	1.08936	0.82064	1.59066	0.62956	0.93666	0.91594
1	T47D	5-FU	0.04	0.79269	1.54602	1.10952	1.65552	1.19432	1.03154	1.17883	1.28135
1	T47D	5-FU	0.12	1.43026	1.14373	1.00623	1.37018	0.9308	0.74483	1.09142	1.13512
1	T47D	5-FU	0.37	0.91836	0.74373	1.21193	0.66993	1.08012	0.75328	0.77323	0.73025
1	T47D	5-FU	1.1	0.85269	0.77187	0.81736	0.99367	0.89819	0.82144	0.77511	0.73215
1	T47D	5-FU	3.4	0.92671	0.64823	0.86133	0.86575	0.63651	0.90863	0.81449	0.77324
1	T47D	5-FU	10	0.77459	0.79159	0.96326	0.4438	0.65567	0.48691	0.57604	0.55559
1	UACC62	5-FU	0.0045	0.93063	0.89363	1.09309	1.0817	1.10377	1.01943	1.03326	1.04719
1	UACC62	5-FU	0.014	0.91588	0.94093	0.91218	0.94576	1.01421	0.91516	0.9499	0.9329
1	UACC62	5-FU	0.04	0.85238	0.85393	1.05662	1.00009	0.95288	0.9411	0.96327	0.95036
1	UACC62	5-FU	0.12	0.97609	1.03869	0.97347	0.93358	1.06159	1.06752	1.00496	1.0069
1	UACC62	5-FU	0.37	1.15285	1.08249	1.14536	0.99798	0.84263	0.80327	1.0266	1.03756
1	UACC62	5-FU	1.1	0.85573	0.98334	0.73761	0.91631	0.81498	0.85585	0.89499	0.86453
1	UACC62	5-FU	3.4	0.82335	0.74095	0.77618	0.80798	0.66253	0.65749	0.81366	0.77235
1	UACC62	5-FU	10	0.64156	0.64681	0.6748	0.68523	0.63468	0.57418	0.70346	0.66293
1	UWB1289	5-FU	0.0045	0.99086	1.00708	0.90148	1.09532	0.83134	0.95697	0.97783	0.96973
1	UWB1289	5-FU	0.014	1.02683	1.07557	0.90583	1.09371	0.9342	0.90037	0.9835	0.97739
1	UWB1289	5-FU	0.04	1.06342	1.0743	0.87704	0.73799	0.86908	1.02236	0.95672	0.94177
1	UWB1289	5-FU	0.12	0.98678	1.0477	0.83095	0.92172	0.95364	0.90787	0.94604	0.92792
1	UWB1289	5-FU	0.37	0.9553	0.91259	0.92885	0.89208	0.9605	0.91537	0.932	0.91004
1	UWB1289	5-FU	1.1	0.76238	0.75968	0.71898	0.72606	0.88698	0.85278	0.771	0.72799
1	UWB1289	5-FU	3.4	0.75659	0.69721	0.6781	0.65001	0.71085	0.73429	0.70572	0.66501
1	UWB1289	5-FU	10	0.55981	0.64362	0.51441	0.52406	0.59777	0.55642	0.51097	0.50766
1	UWB1289BRCA1	5-FU	0.0045	0.9455	1.00451	1.06369	0.98919	0.98667	1.02586	0.99796	0.99718
1	UWB1289BRCA1	5-FU	0.014	1.02312	1.05008	1.03734	0.99058	1.01326	1.04764	1.01924	1.02703
1	UWB1289BRCA1	5-FU	0.04	1.09175	0.9676	0.98989	1.04592	1.02539	0.95071	1.00492	1.00684
1	UWB1289BRCA1	5-FU	0.12	0.9677	1.00734	1.03016	0.99216	0.96992	1.03	0.99984	0.99978
1	UWB1289BRCA1	5-FU	0.37	0.92565	0.90033	0.91147	0.87544	0.88379	0.94341	0.93615	0.91529
1	UWB1289BRCA1	5-FU	1.1	0.80544	0.77673	0.78504	0.77115	0.81486	0.82885	0.85198	0.81448
1	UWB1289BRCA1	5-FU	3.4	0.82081	0.78863	0.71487	0.68784	0.74034	0.79848	0.8265	0.78622
1	UWB1289BRCA1	5-FU	10	0.6372	0.59062	0.55284	0.56133	0.68157	0.65747	0.68478	0.64598
1	VCAP	5-FU	0.0045	1.16285	1.03154	1.14001	0.98925	1.09127	1.00983	1.05457	1.07859
1	VCAP	5-FU	0.014	1.14283	1.13425	0.98382	0.90698	1.0221	0.99385	1.00728	1.01014
1	VCAP	5-FU	0.04	1.03358	1.16256	1.20636	1.02873	1.10496	0.99181	1.06134	1.08876
1	VCAP	5-FU	0.12	1.02654	1.15157	0.91072	0.88842	1.08271	0.96288	0.99514	0.99329
1	VCAP	5-FU	0.37	0.94397	0.97391	1.02238	1.01737	1.0744	0.72174	0.996	0.99447
1	VCAP	5-FU	1.1	1.01036	0.95553	1.10018	0.87455	1.0104	0.94642	0.98424	0.97839
1	VCAP	5-FU	3.4	1.01391	1.05068	1.0315	1.03893	1.04314	0.98249	1.03169	1.04491
1	VCAP	5-FU	10	0.86546	0.83973	0.91857	0.73419	0.85133	0.85143	0.85265	0.81524
1	ZR751	5-FU	0.0045	0.83964	0.8769	1.14142	1.07557	0.83067	0.83259	0.81517	0.77396
1	ZR751	5-FU	0.014	0.98684	1.04818	0.89588	0.8564	0.87827	0.93801	0.89515	0.86472
1	ZR751	5-FU	0.04	1.06397	0.9082	0.99378	1.03408	0.89115	0.9278	0.95163	0.93514
1	ZR751	5-FU	0.12	0.84454	0.96199	0.90436	0.94537	0.83197	0.86046	0.84871	0.8108
1	ZR751	5-FU	0.37	0.98779	0.73289	0.94823	0.69479	1.10319	1.04262	0.96068	0.94695
1	ZR751	5-FU	1.1	0.71014	0.8625	0.85532	0.69264	0.86765	0.85599	0.81148	0.77002
1	ZR751	5-FU	3.4	0.69807	0.68259	0.5722	0.59882	0.62599	0.60901	0.417	0.44566
1	ZR751	5-FU	10	0.60205	0.64261	0.51899	0.43687	0.53132	0.61069	0.31314	0.38589
1	A2058	ABT-888	0.0045	0.96373	1.08112	0.98597	1.07389	1.06401	1.16144	1.03385	1.04804
1	A2058	ABT-888	0.014	0.94423	1.05048	1.02153	1.09014	1.05921	1.15831	1.02711	1.0383
1	A2058	ABT-888	0.04	1.00804	1.04872	0.99314	1.18076	1.03697	1.10116	1.0213	1.02997
1	A2058	ABT-888	0.12	0.91487	1.0174	1.01365	1.15927	1.00977	1.20747	1.00782	1.0109
1	A2058	ABT-888	0.37	0.08902	1.13985	1.02704	1.13152	0.97169	1.0714	1.02439	1.03439
1	A2058	ABT-888	1.1	1.07184	1.15598	1.01851	1.06504	0.91883	1.13342	1.03361	1.0477
1	A2058	ABT-888	3.4	1.03267	1.09246	0.98521	1.02659	0.98352	1.01547	1.01056	1.01475
1	A2058	ABT-888	10	0.93422	1.05243	1.02212	1.00956	0.80999	1.04542	1.00798	1.01112
1	A2780	ABT-888	0.0045	1.02216	1.00764	1.00345	0.96217	1.01234	1.05198	1.00386	1.00537
1	A2780	ABT-888	0.014	1.01316	0.93665	0.96982	1.05857	1.09539	0.97902	0.99848	0.9979
1	A2780	ABT-888	0.04	0.98022	1.00344	0.98387	0.87188	1.04416	1.02849	0.99753	0.99658
1	A2780	ABT-888	0.12	0.88609	0.94458	0.96935	0.91563	1.07644	0.97615	0.98292	0.9766
1	A2780	ABT-888	0.37	1.03788	1.01764	1.07345	1.00909	1.00101	0.97687	1.00516	1.00718
1	A2780	ABT-888	1.1	0.91475	0.91537	1.00813	0.96414	0.92379	0.92628	0.96974	0.95892
1	A2780	ABT-888	3.4	1.06999	1.02121	1.01101	0.90512	0.91181	0.96065	0.99446	0.99235
1	A2780	ABT-888	10	0.80042	0.95819	0.87425	0.80605	0.69929	0.67236	0.91491	0.88873
1	A375	ABT-888	0.0045	0.87024	0.863	0.93994	0.92939	1.13379	1.10692	0.96772	0.95624
1	A375	ABT-888	0.014	0.84801	0.78768	1.0097	1.06428	1.07623	1.09095	1.01736	1.02436
1	A375	ABT-888	0.04	0.8774	0.73689	0.9692	0.98828	1.11174	1.08797	0.98973	0.98586
1	A375	ABT-888	0.12	0.85921	0.7961	1.03844	1.05742	1.11178	1.14629	1.02237	1.0315
1	A375	ABT-888	0.37	1.12159	1.03996	1.05866	1.07808	0.99884	0.89762	1.023	1.0324
1	A375	ABT-888	1.1	1.13614	1.17787	1.15707	1.07802	0.92096	0.88117	1.04861	1.06971
1	A375	ABT-888	3.4	1.09675	1.00346	1.04697	1.09736	1.05651	0.88705	1.02411	1.03399
1	A375	ABT-888	10	1.12865	1.10897	1.15895	1.06855	0.8849	0.85501	1.04064	1.05796
1	A427	ABT-888	0.0045	0.78882	1.0121	1.11536	NULL	NULL	NULL	1.00651	1.00907
1	A427	ABT-888	0.014	1.02502	1.08294	1.12594	NULL	NULL	NULL	1.0431	1.06157
1	A427	ABT-888	0.04	0.77295	0.48043	1.18027	NULL	NULL	NULL	0.86068	0.82437
1	A427	ABT-888	0.12	0.37268	0.89886	1.20465	NULL	NULL	NULL	0.94232	0.92315
1	A427	ABT-888	0.37	0.8774	1.07149	0.9117	NULL	NULL	NULL	0.94999	0.93302
1	A427	ABT-888	1.1	0.91465	0.98723	0.87055	NULL	NULL	NULL	0.95174	0.93529
1	A427	ABT-888	3.4	0.93183	1.01054	0.93813	NULL	NULL	NULL	0.96545	0.95323
1	A427	ABT-888	10	0.81007	0.67958	0.71793	NULL	NULL	NULL	0.82074	0.77996
1	CAOV3	ABT-888	0.0045	1.13379	1.1414	1.11338	1.08552	1.30264	1.1739	1.16794	1.26215
1	CAOV3	ABT-888	0.014	1.01865	0.83663	1.07351	0.97196	0.95306	1.04727	0.99386	0.99152
1	CAOV3	ABT-888	0.04	1.21269	1.17126	0.97397	1.1827	1.15161	1.12624	1.19495	1.3103
1	CAOV3	ABT-888	0.12	0.85512	1.04102	1.10547	0.85382	1.01873	0.98662	1.00347	1.00482
1	CAOV3	ABT-888	0.37	1.3725	1.12235	1.12656	0.82721	1.14848	1.04298	1.15281	1.23595
1	CAOV3	ABT-888	1.1	1.30369	1.09269	1.21821	0.88787	1.0327	0.97426	1.07921	1.11606
1	CAOV3	ABT-888	3.4	0.9336	1.08093	0.88874	0.8422	1.05999	0.95198	0.92326	0.89908
1	CAOV3	ABT-888	10	1.0483	0.90814	1.03253	0.96351	0.86981	0.84265	0.9136	0.88712
1	COLO320DM	ABT-888	0.0045	0.84971	1.12397	1.25073	0.89336	0.98075	1.06404	1.00799	1.01114
1	COLO320DM	ABT-888	0.014	0.88625	0.99194	0.98081	0.95628	1.04974	1.01866	0.99505	0.99316
1	COLO320DM	ABT-888	0.04	0.97017	0.89172	0.78914	0.96795	0.96567	0.87562	0.97331	0.96368
1	COLO320DM	ABT-888	0.12	0.84596	0.91351	1.01707	0.91914	1.13413	0.93191	0.97208	0.96203
1	COLO320DM	ABT-888	0.37	1.06978	0.98736	0.92053	1.14769	1.07377	0.85448	1.01016	1.01418
1	COLO320DM	ABT-888	1.1	0.98988	1.06873	1.04183	1.07234	0.79295	0.95548	1.00567	1.00789
1	COLO320DM	ABT-888	3.4	1.13156	0.99923	1.01663	0.89144	0.81951	1.03158	1.00285	1.00396
1	COLO320DM	ABT-888	10	1.11084	0.8667	0.97402	1.07803	1.00606	0.92865	0.99639	0.99501
1	DLD1	ABT-888	0.0045	1.00659	0.91946	0.93161	1.03861	1.04815	1.00437	1.00211	1.00293
1	DLD1	ABT-888	0.014	0.87524	0.9775	1.10046	1.05675	1.0442	1.05138	1.018	1.02527
1	DLD1	ABT-888	0.04	0.94772	0.94883	0.99602	0.99439	1.13215	1.0108	0.99814	0.99742
1	DLD1	ABT-888	0.12	0.93947	0.89219	0.9626	1.02659	1.14861	1.13088	0.99791	0.99711
1	DLD1	ABT-888	0.37	0.94401	1.0853	0.9279	0.88085	0.90762	0.9068	0.96691	0.95516
1	DLD1	ABT-888	1.1	1.11196	1.14988	1.03218	1.02092	0.87874	1.00373	1.0101	1.0141
1	DLD1	ABT-888	3.4	1.09941	1.10799	1.02419	1.0018	1.00354	0.939	1.00531	1.00739
1	DLD1	ABT-888	10	1.03029	1.13577	1.06443	1.01127	0.77752	0.89977	1.00793	1.01105
1	EFM192B	ABT-888	0.0045	0.99206	1.06642	1.02214	1.07024	1.01435	1.11288	1.03932	1.05602
1	EFM192B	ABT-888	0.014	0.91699	0.91051	0.95395	1.22467	1.01958	1.07157	0.98791	0.98338
1	EFM192B	ABT-888	0.04	1.07083	1.00404	0.70972	0.95181	1.06899	1.13434	1.03255	1.04616
1	EFM192B	ABT-888	0.12	0.82945	0.962	0.89046	1.11302	1.18503	1.2374	1.03342	1.04742
1	EFM192B	ABT-888	0.37	1.03716	1.10803	0.93246	0.95404	0.98902	0.94946	0.97379	0.96432
1	EFM192B	ABT-888	1.1	0.92623	1.03933	0.97958	1.05825	0.9754	0.97219	0.97934	0.97177
1	EFM192B	ABT-888	3.4	1.05813	1.22491	1.13549	0.95878	0.96867	0.99228	1.02259	1.03181
1	EFM192B	ABT-888	10	1.03867	1.12708	1.03297	1.10316	0.89766	0.87809	1.03194	1.04527
1	ES2	ABT-888	0.0045	1.00189	0.72828	0.78726	0.81884	1.04407	0.93706	0.93628	0.91545
1	ES2	ABT-888	0.014	0.99979	0.95844	0.98387	1.04883	1.13174	1.15279	1.01176	1.01644
1	ES2	ABT-888	0.04	1.07755	0.79431	0.89417	0.79427	0.96264	1.03539	0.96363	0.95083
1	ES2	ABT-888	0.12	0.90797	0.9366	1.09344	1.06083	0.97712	1.07395	1.0092	1.01284
1	ES2	ABT-888	0.37	1.04782	1.00451	1.05331	1.08732	0.81591	0.80685	1.01265	1.01769
1	ES2	ABT-888	1.1	1.1435	1.08612	1.14143	1.20453	0.86364	0.82234	1.05275	1.07587
1	ES2	ABT-888	3.4	1.03746	1.07079	1.02481	1.08569	0.82678	0.7927	1.01501	1.02103
1	ES2	ABT-888	10	1.03307	1.14808	1.1128	1.09333	1.02043	0.94648	1.03	1.04247
1	HCT116	ABT-888	0.0045	0.86462	0.90083	0.79998	1.0951	1.04475	1.05439	0.98638	0.9813
1	HCT116	ABT-888	0.014	0.87812	0.85643	1.00653	1.02517	1.17635	1.08579	1.00776	1.01082
1	HCT116	ABT-888	0.04	0.89276	0.87842	0.89307	0.99385	1.073	1.14887	0.97127	0.96095
1	HCT116	ABT-888	0.12	0.8762	0.86417	1.06478	1.09927	1.03204	1.075	1.02334	1.03289
1	HCT116	ABT-888	0.37	1.01473	1.0105	0.95686	1.02316	0.88477	0.8139	0.99188	0.98881
1	HCT116	ABT-888	1.1	1.11499	1.05405	0.95838	1.02527	0.81562	0.85025	0.99595	0.9944
1	HCT116	ABT-888	3.4	0.99634	0.98651	0.95771	1.02784	0.84245	0.79829	0.98604	0.98083
1	HCT116	ABT-888	10	1.1527	1.12251	1.00853	1.13173	0.93446	0.84582	1.03133	1.04439
1	HT144	ABT-888	0.0045	1.00101	0.94862	0.94316	0.93092	1.06828	1.0856	0.98133	0.97445
1	HT144	ABT-888	0.014	0.8944	0.97834	1.05368	1.03403	1.08141	1.01759	1.01865	1.02619
1	HT144	ABT-888	0.04	0.93534	0.90277	1.00589	1.04737	1.10858	1.01457	1.00745	1.01038
1	HT144	ABT-888	0.12	0.91316	1.00319	1.13668	1.02816	1.06606	1.01869	1.01695	1.02378
1	HT144	ABT-888	0.37	1.05494	1.05229	1.02069	1.03743	0.94066	0.92031	1.02097	1.0295
1	HT144	ABT-888	1.1	1.07761	1.12357	0.99222	1.00299	0.89264	0.97193	0.99824	0.99756
1	HT144	ABT-888	3.4	1.00574	1.04798	1.01109	0.95384	0.93226	0.85256	0.98505	0.97949
1	HT144	ABT-888	10	1.21164	1.04803	0.95655	0.95388	0.91655	0.82422	0.96646	0.95457
1	HT29	ABT-888	0.0045	0.92849	0.98582	1.04368	1.0483	1.01158	1.06693	1.01192	1.01666
1	HT29	ABT-888	0.014	0.95113	0.90037	1.02873	1.13411	0.94013	1.03083	0.99557	0.99388
1	HT29	ABT-888	0.04	0.95448	0.93399	1.0053	1.06534	1.07021	1.07183	1.01518	1.02127
1	HT29	ABT-888	0.12	0.96233	0.99328	0.88749	1.02903	1.13393	1.14607	1.00485	1.00675
1	HT29	ABT-888	0.37	1.0624	1.24064	0.91652	0.91306	1.01323	1.06106	1.01594	1.02234
1	HT29	ABT-888	1.1	1.21424	1.1764	1.02613	1.07516	0.99727	1.13276	1.04324	1.06178
1	HT29	ABT-888	3.4	1.16551	1.15534	0.87279	0.98959	1.01559	1.12356	1.02941	1.04161
1	HT29	ABT-888	10	1.0403	1.12638	0.94588	1.03446	0.93655	0.92946	0.99568	0.99403
1	KPL1	ABT-888	0.0045	0.87467	0.91109	0.9049	0.88461	1.13423	1.15751	0.93365	0.91212
1	KPL1	ABT-888	0.014	0.89214	0.86468	0.95113	1.09267	1.128	1.07539	1.00906	1.01264
1	KPL1	ABT-888	0.04	0.91787	0.89168	0.94931	0.79253	1.05075	1.03073	0.95276	0.93661
1	KPL1	ABT-888	0.12	0.85221	0.84736	1.03466	1.08208	1.20536	1.22398	1.039	1.05555
1	KPL1	ABT-888	0.37	1.1462	1.02127	1.06843	1.15052	0.96177	0.85152	1.03016	1.0427
1	KPL1	ABT-888	1.1	1.0197	1.08565	1.04406	0.87882	0.98558	0.76627	1.00181	1.00251
1	KPL1	ABT-888	3.4	0.82696	1.00145	1.04843	0.88318	0.95821	0.83136	0.9432	0.92428
1	KPL1	ABT-888	10	0.99283	0.90111	0.8302	0.92753	0.78398	0.69632	0.90083	0.87155
1	LNCAP	ABT-888	0.0045	0.97839	0.65414	0.64597	0.74102	0.55638	1.254	0.77931	0.73643
1	LNCAP	ABT-888	0.014	1.09578	0.68673	0.95	1.22864	0.7517	0.79877	0.91774	0.89223
1	LNCAP	ABT-888	0.04	0.57294	0.82683	0.51096	0.79405	0.66972	0.99215	0.80872	0.76708
1	LNCAP	ABT-888	0.12	1.05379	0.97729	0.97959	0.74054	1.14794	0.59903	0.98664	0.98165
1	LNCAP	ABT-888	0.37	0.85653	0.96968	1.10306	0.68427	0.77439	0.81477	0.88998	0.85854
1	LNCAP	ABT-888	1.1	1.10413	0.61516	0.73832	1.03528	0.95	0.94325	0.96639	0.95448
1	LNCAP	ABT-888	3.4	0.87122	1.41403	0.936	1.0876	0.98069	1.0201	1.00025	1.00035
1	LNCAP	ABT-888	10	0.8289	0.62417	1.09593	0.56378	1.19829	0.75145	0.85568	0.81867
1	LOVO	ABT-888	0.0045	0.73327	0.90635	1.03205	0.88963	1.16181	1.21879	0.98494	0.97934
1	LOVO	ABT-888	0.014	0.91816	0.73319	0.95788	0.87499	0.89671	0.89382	0.94675	0.92884
1	LOVO	ABT-888	0.04	0.8019	0.92559	0.80778	0.90693	0.90192	1.1327	0.95165	0.93517
1	LOVO	ABT-888	0.12	0.89465	0.98159	0.95498	0.86231	1.03698	0.9797	0.98402	0.97809
1	LOVO	ABT-888	0.37	0.87897	0.94558	1.06642	1.09468	1.02628	0.91987	0.99318	0.99059
1	LOVO	ABT-888	1.1	1.06032	1.28878	0.97969	0.90535	0.77967	1.08129	1.00953	1.0133
1	LOVO	ABT-888	3.4	0.94608	1.20978	0.9852	0.99032	0.85667	1.11916	0.99407	0.99181
1	LOVO	ABT-888	10	0.92686	0.99241	0.94453	0.65329	0.70255	0.80944	0.93195	0.90998
1	MDAMB436	ABT-888	0.0045	0.92236	1.04712	0.85744	0.88565	1.03071	1.01318	0.98166	0.9749
1	MDAMB436	ABT-888	0.014	0.91639	0.97526	0.99163	0.98228	1.03928	1.10762	0.99265	0.98986
1	MDAMB436	ABT-888	0.04	1.0098	0.95583	0.75045	0.86687	0.97587	1.00618	0.98055	0.9734
1	MDAMB436	ABT-888	0.12	0.90518	0.93265	1.00414	0.98889	1.04769	0.97897	0.99093	0.98751
1	MDAMB436	ABT-888	0.37	1.06157	0.98972	1.06197	1.01745	0.91882	0.90975	1.00201	1.00279
1	MDAMB436	ABT-888	1.1	1.02603	1.02065	1.00385	0.89402	0.88443	0.89756	0.97171	0.96154
1	MDAMB436	ABT-888	3.4	1.04154	0.97995	0.85841	0.85802	0.83274	0.82454	0.91442	0.88813
1	MDAMB436	ABT-888	10	0.77066	0.7971	0.85251	0.70408	0.78709	0.79877	0.86953	0.83454
1	MSTO	ABT-888	0.0045	0.76164	0.63019	0.58626	0.77532	0.96097	0.68612	0.86416	0.82835
1	MSTO	ABT-888	0.014	1.00573	0.63817	0.91252	1.20583	0.94937	1.13831	0.99045	0.98685
1	MSTO	ABT-888	0.04	1.02937	0.81797	0.68715	0.31732	0.99881	1.05681	0.95961	0.94555
1	MSTO	ABT-888	0.12	0.87026	0.92009	0.99788	1.10074	1.05475	1.12611	1.01092	1.01525
1	MSTO	ABT-888	0.37	0.80422	1.21979	0.94514	0.25481	0.72713	0.51228	0.88776	0.8559
1	MSTO	ABT-888	1.1	0.97247	1.24589	0.66207	1.33775	0.65874	0.99912	0.99399	0.9917
1	MSTO	ABT-888	3.4	1.12502	0.46906	0.97735	1.17808	0.81549	0.98755	0.99256	0.98974
1	MSTO	ABT-888	10	1.00906	0.78437	0.93502	0.05552	0.8148	1.21491	0.94382	0.92507
1	NCIH1650	ABT-888	0.0045	1.04525	1.06622	0.93024	1.02647	1.00291	1.02331	1.01899	1.02668
1	NCIH1650	ABT-888	0.014	0.95962	0.93004	1.07299	1.07761	1.08572	0.98057	1.02042	1.02871
1	NCIH1650	ABT-888	0.04	1.00166	1.0323	1.03531	0.97507	1.03905	1.0115	1.01674	1.02348
1	NCIH1650	ABT-888	0.12	0.89979	0.97787	1.06448	0.97346	1.06247	1.04818	1.00999	1.01395
1	NCIH1650	ABT-888	0.37	1.00109	1.01382	1.03767	0.97304	0.96445	0.8031	0.98994	0.98615
1	NCIH1650	ABT-888	1.1	1.03828	0.9996	0.96126	0.97657	0.9154	0.95146	0.97561	0.96675
1	NCIH1650	ABT-888	3.4	1.09284	0.99185	1.04383	0.87337	0.88395	0.81748	0.95047	0.93364
1	NCIH1650	ABT-888	10	0.97645	0.72705	0.83242	0.82629	0.83637	0.77372	0.85545	0.81841
1	NCIH2122	ABT-888	0.0045	1.10974	1.01114	1.01298	1.00083	1.05083	1.06197	1.01419	1.01987
1	NCIH2122	ABT-888	0.014	1.1181	0.93837	1.1176	1.02221	1.10405	1.09585	1.04303	1.06147
1	NCIH2122	ABT-888	0.04	1.05693	0.99011	1.05915	1.05373	1.05168	0.96858	1.0232	1.03268
1	NCIH2122	ABT-888	0.12	0.9982	0.98009	1.00801	1.0189	1.15141	1.03155	1.00604	1.00841
1	NCIH2122	ABT-888	0.37	1.08692	1.10581	0.93558	0.90551	0.8942	0.95944	0.97564	0.96679
1	NCIH2122	ABT-888	1.1	0.96673	1.03051	0.94676	1.0555	0.92401	0.84733	0.98002	0.97268
1	NCIH2122	ABT-888	3.4	0.94653	0.9947	0.84623	0.90682	0.86228	0.84553	0.94458	0.92605
1	NCIH2122	ABT-888	10	0.92734	0.94425	0.84289	0.88419	0.77464	0.75318	0.93372	0.91221
1	NCIH23	ABT-888	0.0045	1.01053	1.0444	1.03765	0.85096	1.07727	1.10342	1.01884	1.02646
1	NCIH23	ABT-888	0.014	0.84517	0.9835	1.05726	0.99187	1.0702	0.98851	0.99538	0.99362
1	NCIH23	ABT-888	0.04	0.9655	0.85806	0.95122	0.97336	1.11721	0.95347	0.98061	0.97348
1	NCIH23	ABT-888	0.12	0.84973	0.86901	0.95879	0.97781	1.10453	1.31718	0.9849	0.97928
1	NCIH23	ABT-888	0.37	1.14449	0.99545	0.99784	0.86434	0.92846	0.9647	0.99057	0.98701
1	NCIH23	ABT-888	1.1	1.02384	1.11834	0.99649	0.96824	0.98074	0.92087	0.99464	0.9926
1	NCIH23	ABT-888	3.4	1.05771	1.06544	0.98797	0.84863	1.13775	0.88861	1.01059	1.01479
1	NCIH23	ABT-888	10	1.0363	1.001	0.93754	0.87866	0.99281	1.08466	0.99855	0.99799
1	NCIH460	ABT-888	0.0045	0.89022	0.93617	0.97461	0.97652	0.996	1.06357	0.98368	0.97763
1	NCIH460	ABT-888	0.014	0.88413	0.81604	1.01662	0.96059	0.99244	0.99957	0.98433	0.97851
1	NCIH460	ABT-888	0.04	0.9026	0.88521	0.92865	0.96539	1.02914	1.09311	0.9641	0.95145
1	NCIH460	ABT-888	0.12	0.88089	0.80508	1.01383	1.0853	1.09158	1.03526	1.01599	1.02241
1	NCIH460	ABT-888	0.37	0.99195	1.03414	0.95773	0.9683	0.917	0.98711	0.98513	0.9796
1	NCIH460	ABT-888	1.1	1.04423	1.07871	0.98309	1.01466	0.87181	0.87934	0.99926	0.99897
1	NCIH460	ABT-888	3.4	0.97979	1.089	0.98746	1.00185	0.94035	1.00271	0.99647	0.99512
1	NCIH460	ABT-888	10	0.9872	1.04906	0.9468	1.03544	0.81072	0.8901	0.97787	0.96979
1	NCIH520	ABT-888	0.0045	1.04115	0.7896	1.17691	0.90649	1.04906	1.01176	1.01031	1.0144
1	NCIH520	ABT-888	0.014	0.88721	0.96909	0.89795	0.99327	1.10229	1.21137	0.99249	0.98964
1	NCIH520	ABT-888	0.04	0.93096	0.97991	1.05712	0.93572	1.15716	0.83288	0.98297	0.97667
1	NCIH520	ABT-888	0.12	0.84068	1.05567	0.88674	0.91236	1.2691	1.10424	0.99363	0.99121
1	NCIH520	ABT-888	0.37	1.10075	1.21178	0.90054	1.02468	1.06444	0.67003	1.01722	1.02416
1	NCIH520	ABT-888	1.1	0.93178	0.91605	1.21492	1.00813	1.07186	0.8794	0.98795	0.98343
1	NCIH520	ABT-888	3.4	0.89886	0.96428	1.23564	0.95532	1.11051	0.68611	0.98379	0.97778
1	NCIH520	ABT-888	10	1.09743	1.00157	0.93775	0.89709	1.1483	0.87053	0.98783	0.98327
1	OCUBM	ABT-888	0.0045	0.86276	0.9299	1.19689	0.92296	1.03807	1.09541	0.98179	0.97507
1	OCUBM	ABT-888	0.014	1.01497	0.87636	1.16469	0.8524	0.95251	1.06192	0.98151	0.97469
1	OCUBM	ABT-888	0.04	0.91833	0.89435	0.81727	0.76852	0.93894	0.98149	0.8891	0.85749
1	OCUBM	ABT-888	0.12	0.95719	0.94597	1.01109	0.94981	0.97548	1.08603	0.96139	0.94788
1	OCUBM	ABT-888	0.37	1.12553	0.95579	1.01727	1.05893	0.92527	0.92978	0.98471	0.97903
1	OCUBM	ABT-888	1.1	0.98578	0.94456	0.94946	0.92022	0.95694	1.00584	0.94595	0.92781
1	OCUBM	ABT-888	3.4	1.09228	0.97591	0.97095	0.97092	0.82847	0.9506	0.96674	0.95494
1	OCUBM	ABT-888	10	0.90273	1.07467	0.96696	1.04178	0.87174	1.0467	1.00492	1.00684
1	OV90	ABT-888	0.0045	0.97105	0.96502	1.0421	0.99162	1.05493	1.09057	1.01323	1.01851
1	OV90	ABT-888	0.014	0.86773	0.96134	1.00019	1.01042	1.08587	1.06106	1.00418	1.00581
1	OV90	ABT-888	0.04	0.98676	0.99734	1.04737	0.97102	1.1203	1.10521	1.01749	1.02454
1	OV90	ABT-888	0.12	0.89587	0.94094	1.08425	0.94132	1.08484	0.99779	0.97553	0.96665
1	OV90	ABT-888	0.37	1.05049	1.06123	1.05852	0.97647	0.92071	0.92148	1.0106	1.0148
1	OV90	ABT-888	1.1	1.09803	1.08678	1.08446	0.9475	0.9407	0.94073	1.01255	1.01755
1	OV90	ABT-888	3.4	1.03828	1.07827	1.04262	0.99593	0.99273	0.95424	1.01343	1.01879
1	OV90	ABT-888	10	1.09398	0.92528	1.00659	1.0777	0.93299	0.87757	0.97572	0.9669
1	OVCAR3	ABT-888	0.0045	0.97562	1.04101	1.01084	1.00801	1.13628	1.06107	1.02517	1.03551
1	OVCAR3	ABT-888	0.014	1.03167	0.87763	1.04443	1.04024	1.02193	0.97408	1.026	1.0367
1	OVCAR3	ABT-888	0.04	0.97302	1.04123	1.04847	0.93186	0.99354	0.92431	0.98342	0.97728
1	OVCAR3	ABT-888	0.12	1.093	1.00333	1.08805	0.94307	1.05984	0.96038	1.03057	1.04329
1	OVCAR3	ABT-888	0.37	1.18143	1.04615	1.08334	1.01186	1.1922	1.1626	1.11401	1.17123
1	OVCAR3	ABT-888	1.1	0.94056	1.06363	1.01636	0.92854	0.98287	0.94571	0.96425	0.95165
1	OVCAR3	ABT-888	3.4	1.04664	0.99863	1.00359	0.78549	1.07497	0.86785	1.00109	1.00151
1	OVCAR3	ABT-888	10	0.92401	0.86562	0.87939	0.85922	0.72589	0.8145	0.85449	0.81732
1	PA1	ABT-888	0.0045	0.84248	0.85622	0.89417	0.9507	1.02711	1.13986	0.9624	0.94921
1	PA1	ABT-888	0.014	0.81135	0.83955	1.03174	0.96881	1.17323	1.22369	1.00013	1.00018
1	PA1	ABT-888	0.04	0.84288	0.9885	0.94248	1.01135	1.12523	1.12431	0.99997	0.99996
1	PA1	ABT-888	0.12	0.87173	0.97584	0.97081	1.00806	1.02358	1.06729	0.99624	0.9948
1	PA1	ABT-888	0.37	1.18442	1.12595	1.09831	1.05923	0.89314	0.90345	1.03531	1.05017
1	PA1	ABT-888	1.1	1.19188	1.33283	1.08913	1.072	0.85595	0.84934	1.03609	1.0513
1	PA1	ABT-888	3.4	1.10091	0.95539	1.0254	0.97858	0.97224	0.83951	0.9884	0.98405
1	PA1	ABT-888	10	1.05617	0.99169	1.03956	0.86497	0.75958	0.99988	0.99804	0.99729
1	RKO	ABT-888	0.0045	0.76445	0.8576	0.61964	0.78159	1.0891	1.08596	0.90834	0.88067
1	RKO	ABT-888	0.014	0.81307	0.79598	0.95881	0.96762	1.0832	1.04233	0.98273	0.97634
1	RKO	ABT-888	0.04	0.81857	0.82084	0.83626	0.84849	1.07104	1.05229	0.92097	0.89623
1	RKO	ABT-888	0.12	0.80242	0.81699	0.94545	1.00922	1.08072	1.06137	0.98944	0.98547
1	RKO	ABT-888	0.37	1.08026	1.08053	1.01866	1.07422	0.72138	0.72501	1.02091	1.02941
1	RKO	ABT-888	1.1	1.09268	1.10846	1.0944	1.07615	0.70112	0.7324	1.03734	1.05313
1	RKO	ABT-888	3.4	1.07984	1.06955	0.98169	1.03756	0.77103	0.73229	1.00442	1.00615
1	RKO	ABT-888	10	1.07331	1.0984	0.97249	1.03761	0.72792	0.68575	1.00232	1.00322
1	RPMI7951	ABT-888	0.0045	0.99583	0.97042	0.97506	1.03687	1.05087	1.04788	1.01581	1.02216
1	RPMI7951	ABT-888	0.014	0.9622	0.97041	1.07845	1.07478	1.04589	1.03764	1.03989	1.05686
1	RPMI7951	ABT-888	0.04	0.94856	1.07598	0.9347	0.97406	1.1067	1.10937	1.02409	1.03396
1	RPMI7951	ABT-888	0.12	0.88252	0.92414	1.05848	1.05701	1.01703	1.10447	1.03544	1.05036
1	RPMI7951	ABT-888	0.37	1.05389	1.0938	1.07482	1.0269	0.92306	1.07375	1.06031	1.0872
1	RPMI7951	ABT-888	1.1	1.03094	1.032	1.02224	1.02413	0.96499	0.94864	1.02234	1.03145
1	RPMI7951	ABT-888	3.4	1.04159	1.0573	1.0219	0.97154	0.96952	0.96291	0.9968	0.99557
1	RPMI7951	ABT-888	10	1.04026	1.03118	1.07956	1.0614	0.94973	0.93613	1.03421	1.04857
1	SKMEL30	ABT-888	0.0045	0.90445	0.9694	0.99938	0.95754	1.28736	1.10101	0.99243	0.98956
1	SKMEL30	ABT-888	0.014	0.79267	0.87547	0.86507	1.13515	1.12447	1.1582	0.99999	0.99999
1	SKMEL30	ABT-888	0.04	0.88836	0.86956	0.92414	0.76487	1.26557	1.13066	0.95266	0.93648
1	SKMEL30	ABT-888	0.12	0.72134	0.89826	1.15932	0.96477	1.00734	1.06048	0.99325	0.99069
1	SKMEL30	ABT-888	0.37	1.20192	1.05215	0.90636	1.04585	0.97208	0.84609	1.00429	1.00596
1	SKMEL30	ABT-888	1.1	0.95763	1.25085	0.96929	1.09093	0.9062	0.83847	0.9821	0.97549
1	SKMEL30	ABT-888	3.4	1.03414	1.1743	1.04934	1.19222	0.92179	0.87552	1.01967	1.02764
1	SKMEL30	ABT-888	10	1.30612	1.0913	0.9249	1.10663	0.94657	0.86207	1.00902	1.01258
1	SKMES1	ABT-888	0.0045	0.97654	0.96903	0.90054	1.06515	1.07449	1.14168	1.01098	1.01534
1	SKMES1	ABT-888	0.014	0.82745	0.89235	1.06076	1.07749	1.02633	1.09059	1.0227	1.03197
1	SKMES1	ABT-888	0.04	1.04841	1.05945	0.19924	0.8463	1.09389	1.02606	1.01947	1.02736
1	SKMES1	ABT-888	0.12	0.78247	0.97144	0.90061	1.03642	1.06986	1.03477	1.00165	1.00229
1	SKMES1	ABT-888	0.37	1.00889	0.98363	1.14509	1.10877	0.96561	0.8925	0.998	0.99723
1	SKMES1	ABT-888	1.1	1.14794	1.06555	0.88035	1.04879	1.01052	1.07183	1.02961	1.0419
1	SKMES1	ABT-888	3.4	0.92091	1.03534	1.03335	0.94463	0.9662	1.04904	0.99988	0.99983
1	SKMES1	ABT-888	10	0.99217	1.05597	0.97395	0.92904	0.77695	0.99408	0.9909	0.98746
1	SKOV3	ABT-888	0.0045	1.02557	0.9879	0.98148	NULL	NULL	NULL	0.99302	0.99037
1	SKOV3	ABT-888	0.014	0.94569	1.09792	1.08813	NULL	NULL	NULL	1.0484	1.0694
1	SKOV3	ABT-888	0.04	0.97059	1.10856	1.10693	NULL	NULL	NULL	1.05822	1.08406
1	SKOV3	ABT-888	0.12	1.09974	1.05096	1.1225	NULL	NULL	NULL	1.05448	1.07845
1	SKOV3	ABT-888	0.37	0.98202	1.01108	1.01227	NULL	NULL	NULL	1.00631	1.00879
1	SKOV3	ABT-888	1.1	0.90174	1.06413	0.92045	NULL	NULL	NULL	0.9525	0.93627
1	SKOV3	ABT-888	3.4	1.08825	0.94743	1.08529	NULL	NULL	NULL	1.0469	1.06718
1	SKOV3	ABT-888	10	1.06547	0.99496	1.03875	NULL	NULL	NULL	1.02179	1.03067
1	SW620	ABT-888	0.0045	0.89141	0.95406	0.792	0.87063	0.90932	0.99929	0.9582	0.9437
1	SW620	ABT-888	0.014	0.96362	0.84559	1.02562	1.06603	1.12179	1.06753	1.01784	1.02504
1	SW620	ABT-888	0.04	0.95159	0.95957	0.88615	0.87174	0.98396	1.06399	0.9819	0.97522
1	SW620	ABT-888	0.12	0.86524	0.97035	1.10942	0.96374	1.05777	1.13448	1.00556	1.00774
1	SW620	ABT-888	0.37	1.16638	1.04483	0.9609	1.01122	0.97624	0.99469	1.00117	1.00162
1	SW620	ABT-888	1.1	1.04264	0.97043	0.97625	1.08801	0.97144	0.96166	0.98944	0.98547
1	SW620	ABT-888	3.4	1.11148	1.0867	0.91493	0.93566	0.96998	0.93773	0.98119	0.97426
1	SW620	ABT-888	10	1.14369	1.02843	0.97749	1.10749	0.99128	0.91106	1.0039	1.00542
1	SW837	ABT-888	0.0045	1.07055	1.02558	0.67716	1.07005	0.98653	0.92275	1.00392	1.00545
1	SW837	ABT-888	0.014	0.86675	1.02484	0.97831	1.22862	1.19247	1.08724	1.03539	1.05028
1	SW837	ABT-888	0.04	1.16238	1.2334	0.97157	1.21486	1.0205	0.83357	1.05679	1.08191
1	SW837	ABT-888	0.12	1.09118	1.15061	1.42262	0.79858	1.28715	1.03353	1.07408	1.10816
1	SW837	ABT-888	0.37	1.07602	1.02821	1.03975	0.74368	0.70405	0.82117	0.94918	0.93197
1	SW837	ABT-888	1.1	1.06248	0.9556	0.87063	0.9189	0.91286	0.91645	0.94424	0.92561
1	SW837	ABT-888	3.4	1.08877	1.29981	0.7686	0.84584	0.69793	1.01498	0.95318	0.93716
1	SW837	ABT-888	10	1.05127	0.79067	0.80133	1.10686	0.78926	0.81612	0.8622	0.82611
1	T47D	ABT-888	0.0045	0.71681	1.3103	0.97695	1.05417	1.18652	0.8187	1.01952	1.02743
1	T47D	ABT-888	0.014	0.84111	1.4109	1.31372	1.23786	2.51064	1.48763	1.39094	1.71937
1	T47D	ABT-888	0.04	1.27187	0.87858	0.98516	1.10843	0.97935	1.06488	1.03125	1.04427
1	T47D	ABT-888	0.12	0.72446	1.22383	1.01346	0.91428	1.18772	1.34486	1.12119	1.18294
1	T47D	ABT-888	0.37	1.30448	0.98234	1.46926	1.02754	0.8035	1.00654	1.02136	1.03005
1	T47D	ABT-888	1.1	0.91904	0.83459	1.17553	0.67515	1.02923	0.74958	0.83378	0.79419
1	T47D	ABT-888	3.4	1.14572	1.38734	1.18103	0.70366	0.93673	0.91042	1.05109	1.07339
1	T47D	ABT-888	10	1.51968	0.76063	0.99964	0.60044	1.14343	0.65334	0.83856	0.79947
1	UACC62	ABT-888	0.0045	0.92454	0.90829	0.8695	0.93139	1.17167	1.10621	0.94958	0.93249
1	UACC62	ABT-888	0.014	0.91115	0.83037	0.99089	1.09792	1.09383	1.16784	1.02798	1.03955
1	UACC62	ABT-888	0.04	0.88461	0.87338	1.05354	0.97348	1.11953	1.05326	1.00896	1.0125
1	UACC62	ABT-888	0.12	0.89899	0.87437	1.10846	1.01707	1.1261	1.0663	1.02754	1.03892
1	UACC62	ABT-888	0.37	1.07784	1.08103	1.17926	1.01954	1.12485	1.04842	1.05155	1.07408
1	UACC62	ABT-888	1.1	1.03293	1.00913	1.12498	1.15803	0.93342	1.00937	1.01411	1.01975
1	UACC62	ABT-888	3.4	0.97175	0.98221	1.05624	1.14721	0.97442	0.97722	0.98618	0.98102
1	UACC62	ABT-888	10	1.07752	1.07468	1.07521	1.00534	0.9702	1.02911	1.03412	1.04844
1	UWB1289	ABT-888	0.0045	0.95421	1.06756	0.82458	1.0273	0.94127	1.00692	0.98355	0.97745
1	UWB1289	ABT-888	0.014	1.05679	1.00421	0.90657	1.03479	0.90458	1.04148	1.01619	1.0227
1	UWB1289	ABT-888	0.04	0.97834	0.99845	0.80891	1.06255	0.85025	0.99919	0.99021	0.98652
1	UWB1289	ABT-888	0.12	1.05829	1.02004	1.06943	0.93913	0.8983	1.08526	1.03221	1.04566
1	UWB1289	ABT-888	0.37	1.15614	1.18545	0.96658	0.88859	1.02381	0.99259	1.00685	1.00954
1	UWB1289	ABT-888	1.1	0.94231	0.93233	0.99621	0.92475	0.96735	0.97302	0.96124	0.94769
1	UWB1289	ABT-888	3.4	1.12164	1.12576	0.83076	0.84957	1.05137	0.9285	0.99152	0.98831
1	UWB1289	ABT-888	10	0.93448	0.8436	0.89354	0.74689	0.88996	0.87261	0.89403	0.86338
1	UWB1289BRCA1	ABT-888	0.0045	0.99401	0.99251	1.00771	1.09883	1.03487	1.06827	1.01361	1.01905
1	UWB1289BRCA1	ABT-888	0.014	0.94253	0.94342	1.11708	1.07292	1.12415	1.04489	1.03698	1.0526
1	UWB1289BRCA1	ABT-888	0.04	1.0018	0.98173	1.04851	1.01134	1.0098	1.05028	1.00679	1.00946
1	UWB1289BRCA1	ABT-888	0.12	0.96525	0.98899	1.03915	1.05339	1.0683	1.06762	1.02922	1.04134
1	UWB1289BRCA1	ABT-888	0.37	1.07121	1.05381	1.02335	0.90289	1.03924	1.02977	1.02191	1.03084
1	UWB1289BRCA1	ABT-888	1.1	1.09625	1.03088	0.96735	1.01183	0.95586	1.02312	1.0112	1.01565
1	UWB1289BRCA1	ABT-888	3.4	1.06168	1.06745	1.01083	0.85417	1.02267	0.98449	1.01073	1.01499
1	UWB1289BRCA1	ABT-888	10	0.95579	0.95003	0.98586	0.94316	0.8884	0.91888	0.96454	0.95203
1	VCAP	ABT-888	0.0045	1.13331	1.15372	0.92647	0.87488	0.95862	0.98356	0.97313	0.96344
1	VCAP	ABT-888	0.014	1.02611	1.02411	1.15071	0.92534	1.25144	1.05688	1.03724	1.05298
1	VCAP	ABT-888	0.04	1.15409	1.09909	0.94018	0.96398	1.05058	1.10597	1.0661	1.09596
1	VCAP	ABT-888	0.12	0.98988	1.07689	1.09083	1.05154	1.15493	1.04148	1.05699	1.08221
1	VCAP	ABT-888	0.37	0.98261	1.02018	1.03005	0.91368	1.04785	0.94012	1.00128	1.00178
1	VCAP	ABT-888	1.1	1.02689	1.06443	1.21343	1.05944	1.06825	0.94032	1.05504	1.07929
1	VCAP	ABT-888	3.4	1.21775	1.10113	1.11284	0.88926	0.98499	1.03752	1.06139	1.08883
1	VCAP	ABT-888	10	1.19991	1.15277	1.08729	0.94826	1.16106	1.1455	1.12731	1.19302
1	ZR751	ABT-888	0.0045	0.90263	0.96377	0.74395	0.73092	0.83629	1.01727	0.83083	0.79095
1	ZR751	ABT-888	0.014	0.89107	0.81046	0.97423	0.73107	1.07503	0.80789	0.80455	0.76265
1	ZR751	ABT-888	0.04	0.95394	0.88496	0.96161	0.89975	0.95173	0.90667	0.9112	0.88417
1	ZR751	ABT-888	0.12	0.86376	0.89258	0.71828	0.79917	0.9374	0.98167	0.84289	0.80429
1	ZR751	ABT-888	0.37	0.95594	1.07585	0.89385	0.93198	0.97896	0.99446	0.95998	0.94603
1	ZR751	ABT-888	1.1	0.90124	0.87881	0.9181	0.86751	1.11061	0.85924	0.8591	0.82256
1	ZR751	ABT-888	3.4	0.89472	0.93567	0.85865	0.80027	0.95982	0.82844	0.84083	0.80199
1	ZR751	ABT-888	10	0.9036	1.3796	0.87757	0.79847	0.8362	0.84695	0.82078	0.78001
1	A2058	AZD1775	0.00022	1.0131	1.15403	0.17298	1.13076	1.01552	1.1982	1.03583	1.05093
1	A2058	AZD1775	0.00065	0.93483	0.48401	1.00683	1.09093	1.06785	1.15037	1.01861	1.02613
1	A2058	AZD1775	0.002	1.00207	1.15672	0.98925	1.20028	0.96495	1.09675	1.02448	1.03452
1	A2058	AZD1775	0.006	0.93245	0.26871	1.0277	1.16755	1.02327	1.09358	1.01278	1.01787
1	A2058	AZD1775	0.019	1.02909	1.03187	0.79398	0.86802	1.03011	1.03604	1.01481	1.02074
1	A2058	AZD1775	0.055	1.01391	1.05636	1.09796	1.17949	0.95869	1.11392	1.03773	1.0537
1	A2058	AZD1775	0.17	0.7243	0.88261	0.77761	0.92971	0.65615	0.75508	0.8649	0.8292
1	A2058	AZD1775	0.5	0.16559	0.18245	0.09001	0.16632	0.14059	0.14197	0.04958	0.26779
1	A2780	AZD1775	0.00022	0.99462	1.01021	0.0387	1.0697	1.00937	1.04716	1.00378	1.00525
1	A2780	AZD1775	0.00065	0.93887	0.91935	1.04191	0.95262	0.99415	1.05018	0.98952	0.98558
1	A2780	AZD1775	0.002	1.03296	1.07884	1.01052	0.98659	1.05115	0.93925	1.00835	1.01164
1	A2780	AZD1775	0.006	0.98219	0.95087	0.92221	0.9687	1.00122	1.00404	0.99034	0.9867
1	A2780	AZD1775	0.019	1.00762	0.93091	0.62038	0.51156	1.06436	1.03079	0.98788	0.98334
1	A2780	AZD1775	0.055	0.92584	0.90382	0.93137	0.91365	0.93549	0.9455	0.97124	0.96091
1	A2780	AZD1775	0.17	0.58342	0.67649	0.71971	0.75646	0.81299	0.63239	0.86044	0.82409
1	A2780	AZD1775	0.5	0.19814	0.28132	0.21019	0.23123	0.33326	0.26372	0.45772	0.47154
1	A375	AZD1775	0.00022	1.07059	1.04431	1.12403	1.14722	0.95348	1.0287	1.02669	1.03769
1	A375	AZD1775	0.00065	0.96364	1.0362	1.15736	1.15441	0.93015	0.97239	1.00205	1.00285
1	A375	AZD1775	0.002	1.09415	0.9764	1.10666	1.05084	0.97353	0.94525	1.00646	1.009
1	A375	AZD1775	0.006	0.98755	0.989	1.18885	1.09786	0.94417	0.95082	0.99437	0.99223
1	A375	AZD1775	0.019	1.04676	1.07177	0.8065	0.78083	1.08998	1.14497	1.02751	1.03887
1	A375	AZD1775	0.055	0.88142	0.98663	0.98119	0.98615	1.08676	1.04767	0.99345	0.99096
1	A375	AZD1775	0.17	0.75473	0.77779	0.82821	0.83097	0.84858	0.73221	0.89516	0.86473
1	A375	AZD1775	0.5	0.45181	0.40263	0.39797	0.40079	0.47386	0.40306	0.56554	0.54756
1	A427	AZD1775	0.00022	0.90213	1.15893	0.81368	NULL	NULL	NULL	0.94428	0.92566
1	A427	AZD1775	0.00065	1.03192	0.80675	1.076	NULL	NULL	NULL	1.017	1.02385
1	A427	AZD1775	0.002	0.91269	0.82739	0.86539	NULL	NULL	NULL	0.92179	0.89725
1	A427	AZD1775	0.006	1.02483	0.86974	1.09546	NULL	NULL	NULL	1.01327	1.01857
1	A427	AZD1775	0.019	0.84219	0.56491	0.9795	NULL	NULL	NULL	0.90709	0.87915
1	A427	AZD1775	0.055	0.98978	0.66793	0.86821	NULL	NULL	NULL	0.92355	0.89944
1	A427	AZD1775	0.17	0.62544	0.69187	0.60406	NULL	NULL	NULL	0.74613	0.70332
1	A427	AZD1775	0.5	0.12374	0.05811	0.06606	NULL	NULL	NULL	-0.46987	0.13033
1	CAOV3	AZD1775	0.00022	1.0912	1.00282	1.22892	0.93113	1.15942	1.14873	1.1476	1.22706
1	CAOV3	AZD1775	0.00065	0.98539	0.86742	1.23996	0.97659	0.99125	1.01716	0.9847	0.97901
1	CAOV3	AZD1775	0.002	1.12255	0.80564	1.32934	1.07507	1.11158	1.01284	1.11624	1.17485
1	CAOV3	AZD1775	0.006	1.16432	0.9933	0.96871	1.13289	1.16832	1.14728	1.17079	1.26714
1	CAOV3	AZD1775	0.019	0.96365	0.96105	0.51814	0.52516	0.96023	0.69537	0.75382	0.71086
1	CAOV3	AZD1775	0.055	0.72866	0.86483	0.63445	0.74594	0.68241	0.77294	0.603	0.57674
1	CAOV3	AZD1775	0.17	0.37283	0.33826	0.37821	0.39309	0.48553	0.33486	-0.2759	0.17054
1	CAOV3	AZD1775	0.5	0.24526	0.18934	0.29418	0.25438	0.19856	0.23244	-0.86533	0.07533
1	COLO320DM	AZD1775	0.00022	0.90142	0.92918	1.11832	1.21537	0.89788	1.22488	1.00847	1.01181
1	COLO320DM	AZD1775	0.00065	1.00334	0.88196	1.05431	0.88648	0.95438	0.87215	0.97008	0.95937
1	COLO320DM	AZD1775	0.002	1.14822	1.00068	1.28564	1.21066	0.98414	1.09907	1.04206	1.06004
1	COLO320DM	AZD1775	0.006	1.03608	0.91042	1.09566	0.95825	0.96337	0.92436	0.98558	0.98021
1	COLO320DM	AZD1775	0.019	1.24373	1.24088	0.88138	1.03058	0.9353	0.83714	0.99379	0.99143
1	COLO320DM	AZD1775	0.055	0.85397	1.04144	0.88258	0.99274	0.93634	1.01107	0.98697	0.9821
1	COLO320DM	AZD1775	0.17	0.70165	0.80516	0.75852	0.69957	0.80861	0.7477	0.89769	0.86777
1	COLO320DM	AZD1775	0.5	0.19919	0.23366	0.1806	0.19777	0.28463	0.14268	0.41654	0.44537
1	DLD1	AZD1775	0.00022	1.02662	1.08671	1.05709	1.1215	1.06281	0.99358	1.02245	1.03161
1	DLD1	AZD1775	0.00065	1.02943	1.06702	1.11064	1.16346	1.03368	1.0237	1.01894	1.0266
1	DLD1	AZD1775	0.002	1.03001	1.08214	1.02529	1.06741	1.05498	1.06543	1.02254	1.03174
1	DLD1	AZD1775	0.006	1.04284	1.07353	1.0536	1.16256	1.0859	0.97214	1.02376	1.03349
1	DLD1	AZD1775	0.019	1.06052	0.97384	0.89486	0.93307	0.95003	0.96145	0.98254	0.97609
1	DLD1	AZD1775	0.055	0.91132	1.03065	1.02087	1.01314	0.99932	1.0105	1.00453	1.0063
1	DLD1	AZD1775	0.17	0.97566	0.79376	0.85019	0.99923	0.90177	0.70339	0.94894	0.93166
1	DLD1	AZD1775	0.5	0.67199	0.58731	0.69631	0.4936	0.64864	0.71937	0.83995	0.80101
1	EFM192B	AZD1775	0.00022	1.06766	1.07724	1.1449	1.11728	1.04821	0.95795	1.06348	1.09199
1	EFM192B	AZD1775	0.00065	0.69202	0.79169	0.94569	1.01264	1.02923	0.9526	0.95264	0.93645
1	EFM192B	AZD1775	0.002	1.03079	0.98969	1.0596	0.94168	0.97216	0.9857	0.98877	0.98455
1	EFM192B	AZD1775	0.006	0.91305	0.86741	1.01887	1.04469	1.08295	1.03198	1.02279	1.0321
1	EFM192B	AZD1775	0.019	0.97762	0.98167	0.71205	0.8629	1.15478	0.85484	0.92459	0.90074
1	EFM192B	AZD1775	0.055	0.8896	1.00547	0.78705	1.08698	0.92101	0.90399	0.9169	0.89119
1	EFM192B	AZD1775	0.17	0.83972	0.9034	0.70424	0.94562	0.76973	0.76355	0.80285	0.76086
1	EFM192B	AZD1775	0.5	0.48411	0.55386	0.54935	0.63524	0.59208	0.45693	0.4601	0.47309
1	ES2	AZD1775	0.00022	1.19203	1.0943	1.06617	1.04668	1.0054	0.98838	1.02687	1.03795
1	ES2	AZD1775	0.00065	1.04657	1.03489	1.0237	1.13119	1.07984	1.04625	1.02221	1.03127
1	ES2	AZD1775	0.002	1.08213	1.0827	1.01215	1.02278	0.97282	0.98523	1.00848	1.01183
1	ES2	AZD1775	0.006	1.01544	0.99659	1.03668	1.04182	1.07872	1.07288	1.01885	1.02648
1	ES2	AZD1775	0.019	1.12865	0.96252	0.73777	0.72121	1.13027	1.09146	1.01304	1.01824
1	ES2	AZD1775	0.055	1.02321	1.02112	1.02582	1.09587	1.04868	1.15108	1.0179	1.02513
1	ES2	AZD1775	0.17	0.80638	0.94509	0.74973	0.80515	0.85131	0.85683	0.9081	0.88038
1	ES2	AZD1775	0.5	0.2932	0.32494	0.19651	0.30914	0.3132	0.27917	0.41249	0.44288
1	HCT116	AZD1775	0.00022	1.10952	1.00438	1.02174	0.98552	0.97888	0.96209	0.9975	0.99654
1	HCT116	AZD1775	0.00065	0.98462	1.05582	1.17036	1.06682	0.93684	0.89576	1.00988	1.01379
1	HCT116	AZD1775	0.002	1.02071	1.06219	0.98053	0.98795	0.92179	0.90039	0.99216	0.98919
1	HCT116	AZD1775	0.006	0.93576	1.02074	1.06832	1.01139	0.89819	0.97225	0.99595	0.9944
1	HCT116	AZD1775	0.019	1.0326	0.95452	0.82931	0.92954	0.95014	1.0128	0.97589	0.96713
1	HCT116	AZD1775	0.055	1.03253	0.96871	1.05187	0.98289	0.95711	0.93445	0.98791	0.98338
1	HCT116	AZD1775	0.17	1.046	1.01374	0.90868	0.99996	0.96823	0.95959	0.99209	0.98909
1	HCT116	AZD1775	0.5	0.68551	0.76043	0.57235	0.71881	0.8065	0.67654	0.82545	0.78507
1	HT144	AZD1775	0.00022	1.03392	1.05827	1.08337	1.02828	1.01176	1.02833	1.02243	1.03158
1	HT144	AZD1775	0.00065	1.09853	1.10925	1.10763	1.06147	0.98599	1.00718	1.05634	1.08123
1	HT144	AZD1775	0.002	1.07189	0.99951	1.0715	1.07068	0.92308	0.91294	1.02525	1.03562
1	HT144	AZD1775	0.006	1.03148	1.01808	1.12429	0.99445	0.96589	0.99003	1.00457	1.00636
1	HT144	AZD1775	0.019	1.06706	0.98284	0.96634	0.97673	1.05895	1.04587	1.01043	1.01456
1	HT144	AZD1775	0.055	0.9407	1.06875	1.06497	1.03333	1.05845	0.9516	1.03285	1.04659
1	HT144	AZD1775	0.17	0.92835	0.92949	0.86507	0.79348	0.88839	0.8202	0.9037	0.87503
1	HT144	AZD1775	0.5	0.61392	0.70987	0.631	0.71531	0.61759	0.64142	0.66895	0.63196
1	HT29	AZD1775	0.00022	1.10315	1.04436	1.02785	0.81267	0.96342	1.06964	1.01551	1.02173
1	HT29	AZD1775	0.00065	0.97372	0.94271	1.07838	1.10955	1.05213	1.09699	1.02764	1.03906
1	HT29	AZD1775	0.002	1.00476	1.05913	0.95019	1.00849	1.04225	0.98332	1.00289	1.00401
1	HT29	AZD1775	0.006	0.96268	1.10716	1.13688	0.99601	1.08092	1.13815	1.0393	1.05599
1	HT29	AZD1775	0.019	0.93461	1.12576	0.6212	0.64551	0.94872	0.97015	0.97372	0.96422
1	HT29	AZD1775	0.055	1.05062	1.03052	0.6909	1.07284	0.94551	0.91354	0.99473	0.99272
1	HT29	AZD1775	0.17	0.82209	0.7211	0.96162	0.94024	0.79557	0.72242	0.90724	0.87933
1	HT29	AZD1775	0.5	0.08216	0.18359	0.02951	0.0801	0.10127	0.09655	-0.05598	0.23133
1	KPL1	AZD1775	0.00022	0.94993	0.98846	0.95594	1.18479	1.28665	1.08902	1.02613	1.03689
1	KPL1	AZD1775	0.00065	1.01505	1.01397	1.19093	1.11157	0.82408	0.90955	1.0099	1.01382
1	KPL1	AZD1775	0.002	1.06776	1.0059	1.06102	1.07127	1.09917	1.09171	1.0462	1.06614
1	KPL1	AZD1775	0.006	0.95157	1.01463	1.08566	1.06289	1.1499	0.97143	1.02614	1.0369
1	KPL1	AZD1775	0.019	1.01562	1.00055	0.92041	0.93057	1.01988	1.08357	1.00553	1.0077
1	KPL1	AZD1775	0.055	1.0153	1.02732	1.10651	0.9741	0.92591	1.03967	1.0145	1.0203
1	KPL1	AZD1775	0.17	0.83512	0.89974	0.88854	0.7654	0.79012	0.64129	0.85736	0.82058
1	KPL1	AZD1775	0.5	0.60854	0.58092	0.53924	0.6065	0.52594	0.4367	0.6015	0.57554
1	LNCAP	AZD1775	0.00022	1.06677	1.17031	0.98807	0.83499	1.29019	1.26281	1.06865	1.09984
1	LNCAP	AZD1775	0.00065	1.19648	1.14205	1.26546	1.0457	0.72309	1.17421	1.08996	1.13282
1	LNCAP	AZD1775	0.002	1.09494	0.95107	0.84717	0.88896	0.96662	0.88239	0.94891	0.93162
1	LNCAP	AZD1775	0.006	0.83605	0.99113	1.06011	0.81818	0.98938	1.22947	0.994	0.99172
1	LNCAP	AZD1775	0.019	0.81759	1.26214	0.53389	0.70015	0.68035	0.7156	0.78829	0.74565
1	LNCAP	AZD1775	0.055	0.92104	1.10898	1.22599	0.7772	0.77938	1.21643	1.00913	1.01274
1	LNCAP	AZD1775	0.17	0.3549	0.82071	0.66322	0.807	0.65856	0.69472	0.76274	0.71971
1	LNCAP	AZD1775	0.5	0.48617	0.43661	0.67619	0.43718	0.39398	0.46682	0.5134	0.50937
1	LOVO	AZD1775	0.00022	0.91428	0.97864	0.9941	1.27803	1.13343	1.14287	1.02975	1.0421
1	LOVO	AZD1775	0.00065	1.07956	1.02909	0.96399	1.33392	0.79778	1.00334	1.00774	1.01079
1	LOVO	AZD1775	0.002	0.97839	1.24052	1.11932	0.89339	1.01667	1.0626	1.01871	1.02628
1	LOVO	AZD1775	0.006	0.97476	1.09005	1.04058	1.20264	1.1417	1.00994	1.03045	1.04312
1	LOVO	AZD1775	0.019	0.79386	1.04922	0.46973	0.48669	0.8686	0.69428	0.85771	0.82098
1	LOVO	AZD1775	0.055	0.82352	1.01546	0.67602	0.76783	0.69063	0.70766	0.8536	0.81632
1	LOVO	AZD1775	0.17	0.30415	0.32594	0.51032	0.53303	0.30425	0.39422	0.50837	0.50584
1	LOVO	AZD1775	0.5	0.07418	0.11338	0.10247	0.10361	0.08341	0.0825	-0.14352	0.2049
1	MDAMB436	AZD1775	0.00022	1.11843	1.05828	1.04745	1.01134	1.14106	1.05372	1.0305	1.04319
1	MDAMB436	AZD1775	0.00065	1.10692	0.96524	1.09404	0.90501	1.02024	0.95073	0.99592	0.99436
1	MDAMB436	AZD1775	0.002	1.13711	1.09248	1.05924	0.90341	1.03608	1.01483	1.02606	1.03679
1	MDAMB436	AZD1775	0.006	1.0292	0.9783	1.09942	0.96809	1.02251	0.97304	1.00022	1.00031
1	MDAMB436	AZD1775	0.019	1.0411	1.09344	0.9391	0.76282	0.99216	0.94031	0.98078	0.97371
1	MDAMB436	AZD1775	0.055	0.95986	1.04171	0.92505	0.90992	0.99062	0.97387	0.98114	0.97419
1	MDAMB436	AZD1775	0.17	0.95093	0.91238	0.63876	0.61091	0.8937	0.84753	0.92245	0.89807
1	MDAMB436	AZD1775	0.5	0.54365	0.58283	0.46481	0.51962	0.58601	0.48701	0.64635	0.61247
1	MSTO	AZD1775	0.00022	0.91437	1.20931	1.06567	1.25017	0.96004	1.23399	1.05416	1.07797
1	MSTO	AZD1775	0.00065	1.25413	0.96366	0.96498	1.09673	0.88755	1.0575	1.0047	1.00654
1	MSTO	AZD1775	0.002	0.87647	1.38361	1.13908	1.14504	0.92666	1.07182	1.04214	1.06016
1	MSTO	AZD1775	0.006	0.53538	1.01291	0.903	0.93977	0.9409	1.1652	0.97414	0.96479
1	MSTO	AZD1775	0.019	1.02652	1.3327	0.2026	0.13817	0.9807	1.11703	1.00151	1.0021
1	MSTO	AZD1775	0.055	0.93904	1.18655	0.88846	1.2948	0.91002	0.10305	0.96701	0.9553
1	MSTO	AZD1775	0.17	0.68275	0.98578	0.59768	0.7419	0.92164	0.87055	0.90945	0.88203
1	MSTO	AZD1775	0.5	0.11288	0.12488	0.09012	0.13796	0.10899	0.11987	0.09576	0.28549
1	NCIH1650	AZD1775	0.00022	1.017	1.02564	1.00685	1.03437	1.07285	0.98907	1.0163	1.02285
1	NCIH1650	AZD1775	0.00065	0.98319	1.01129	0.93288	0.94393	0.93059	1.03147	0.97132	0.96102
1	NCIH1650	AZD1775	0.002	1.05727	1.04402	0.95036	0.9327	1.0262	1.02152	1.01822	1.02558
1	NCIH1650	AZD1775	0.006	1.03544	1.01514	1.02669	0.95269	1.02985	1.01322	1.016	1.02243
1	NCIH1650	AZD1775	0.019	1.04243	1.05848	0.50332	0.47361	0.91494	0.87857	0.91581	0.88984
1	NCIH1650	AZD1775	0.055	0.9858	1.05676	1.01477	0.98449	1.02557	0.96717	1.00022	1.00031
1	NCIH1650	AZD1775	0.17	0.78779	0.9325	0.88713	0.78313	0.85379	0.64348	0.84743	0.80936
1	NCIH1650	AZD1775	0.5	0.51886	0.55605	0.44931	0.51768	0.5457	0.40034	0.49224	0.49465
1	NCIH2122	AZD1775	0.00022	1.0523	1.03054	1.14202	1.01956	1.03121	1.00724	1.01373	1.01922
1	NCIH2122	AZD1775	0.00065	1.05922	0.91824	1.05374	0.97979	0.97822	0.94068	0.99042	0.98681
1	NCIH2122	AZD1775	0.002	1.12294	1.08605	0.9615	1.01894	0.9675	0.92076	0.99693	0.99575
1	NCIH2122	AZD1775	0.006	1.06573	0.95026	1.07577	0.98938	0.97462	0.95983	0.99179	0.98868
1	NCIH2122	AZD1775	0.019	1.15434	1.04268	0.90071	0.87	0.96063	0.97141	0.98438	0.97858
1	NCIH2122	AZD1775	0.055	1.17388	1.08871	1.06814	1.05239	0.95559	0.89879	1.02644	1.03733
1	NCIH2122	AZD1775	0.17	1.04357	1.01757	1.05031	0.85353	0.85791	0.92709	0.98732	0.98258
1	NCIH2122	AZD1775	0.5	0.1247	0.16644	0.09685	0.14943	0.17272	0.08827	0.10229	0.28809
1	NCIH23	AZD1775	0.00022	0.91345	0.96692	0.94773	1.02936	1.08717	0.95071	0.98029	0.97305
1	NCIH23	AZD1775	0.00065	0.04606	0.9585	1.06416	1.07264	1.01617	1.01142	1.00642	1.00894
1	NCIH23	AZD1775	0.002	0.9391	0.93812	1.01717	0.98494	1.17821	0.94122	0.98237	0.97586
1	NCIH23	AZD1775	0.006	0.9562	0.99965	0.98677	1.04853	1.01252	0.94567	0.99681	0.99559
1	NCIH23	AZD1775	0.019	1.03541	1.12296	0.82287	0.81288	1.06666	0.93344	0.99264	0.98985
1	NCIH23	AZD1775	0.055	0.95107	0.89333	0.99297	0.98948	0.82012	0.78325	0.96204	0.94874
1	NCIH23	AZD1775	0.17	0.19608	0.21506	0.29293	0.30633	0.20175	0.15356	0.26493	0.36095
1	NCIH23	AZD1775	0.5	0.06854	0.06491	0.057	0.05316	0.05395	0.05295	-0.35541	0.15274
1	NCIH460	AZD1775	0.00022	1.00677	1.11056	1.07724	1.04889	0.93855	0.94959	1.0181	1.02541
1	NCIH460	AZD1775	0.00065	0.98269	0.95655	1.01409	1.09511	0.907	0.98157	0.98811	0.98365
1	NCIH460	AZD1775	0.002	0.99353	1.04611	1.02186	1.02086	0.86133	0.9426	1.00473	1.00658
1	NCIH460	AZD1775	0.006	0.91854	0.95961	1.03178	1.06338	0.92699	0.9403	0.96615	0.95416
1	NCIH460	AZD1775	0.019	0.9963	0.98327	0.99043	0.98076	1.00733	1.02621	0.99561	0.99393
1	NCIH460	AZD1775	0.055	0.98218	0.90679	1.01099	0.99469	0.99613	0.98486	0.99323	0.99066
1	NCIH460	AZD1775	0.17	0.96187	0.94427	1.11576	1.04924	0.91477	0.90157	0.9683	0.95701
1	NCIH460	AZD1775	0.5	0.83239	0.81653	0.85912	0.85263	0.87754	0.81993	0.88699	0.85499
1	NCIH520	AZD1775	0.00022	0.90796	0.92144	0.98652	0.87309	1.10628	0.912	0.96565	0.9535
1	NCIH520	AZD1775	0.00065	0.96689	1.12421	1.05546	0.91967	1.27912	1.08794	1.02735	1.03864
1	NCIH520	AZD1775	0.002	0.99827	0.96454	1.19482	0.92111	1.0777	1.05179	1.00977	1.01364
1	NCIH520	AZD1775	0.006	1.17765	0.89479	1.09875	1.01884	0.78617	0.9025	0.98415	0.97827
1	NCIH520	AZD1775	0.019	1.03979	0.85199	0.53839	0.41488	0.92795	0.94014	0.95395	0.93816
1	NCIH520	AZD1775	0.055	1.07827	0.94415	1.05728	1.05458	1.09003	0.84078	1.0215	1.03025
1	NCIH520	AZD1775	0.17	0.98745	1.07203	0.90904	0.8924	1.07124	0.76165	0.97901	0.97132
1	NCIH520	AZD1775	0.5	0.72393	0.5963	0.51809	0.37228	0.67464	0.47264	0.76898	0.72596
1	OCUBM	AZD1775	0.00022	1.08105	1.17669	1.06339	1.01284	1.05496	1.03518	1.06484	1.09405
1	OCUBM	AZD1775	0.00065	1.01849	0.98546	0.97288	0.92803	0.94103	1.21095	0.97626	0.96763
1	OCUBM	AZD1775	0.002	1.01742	0.95561	1.16208	1.10213	1.01885	1.14616	1.06623	1.09616
1	OCUBM	AZD1775	0.006	1.11499	1.08602	1.12283	1.05726	1.05442	1.09068	1.09547	1.14151
1	OCUBM	AZD1775	0.019	0.83293	1.08188	0.90376	0.80961	0.92945	0.90394	0.886	0.85382
1	OCUBM	AZD1775	0.055	0.9442	1.06654	0.84958	1.00875	1.04163	0.87503	0.97315	0.96346
1	OCUBM	AZD1775	0.17	0.74135	0.7153	0.81931	0.78897	0.80574	0.77899	0.72556	0.68355
1	OCUBM	AZD1775	0.5	0.40193	0.45243	0.30746	0.39114	0.4014	0.38513	-0.04384	0.23526
1	OV90	AZD1775	0.00022	0.93558	1.0316	1.03828	0.92659	1.01913	0.99785	1.00669	1.00932
1	OV90	AZD1775	0.00065	0.93141	0.98041	1.04165	1.05863	0.9857	0.93936	0.98648	0.98143
1	OV90	AZD1775	0.002	1.02974	0.98602	0.92683	1.03263	1.00128	1.06464	1.01218	1.01703
1	OV90	AZD1775	0.006	1.01461	0.97089	1.09543	1.08767	0.92046	0.92205	0.99424	0.99205
1	OV90	AZD1775	0.019	0.99933	0.98481	0.92838	0.80272	0.97647	1.03675	0.98453	0.97878
1	OV90	AZD1775	0.055	0.89934	1.00305	1.10163	1.00829	1.14352	1.0363	1.01745	1.02449
1	OV90	AZD1775	0.17	0.95648	0.93348	0.84388	0.92396	0.90665	0.96446	0.94147	0.92206
1	OV90	AZD1775	0.5	0.60025	0.80218	0.46606	0.59182	0.56867	0.49803	0.5692	0.55034
1	OVCAR3	AZD1775	0.00022	1.04865	0.85978	1.12314	0.87611	1.27009	1.16309	1.081	1.11884
1	OVCAR3	AZD1775	0.00065	1.05145	1.08161	1.03101	0.90081	1.0504	1.102	1.04883	1.07004
1	OVCAR3	AZD1775	0.002	1.19132	1.10005	1.1339	0.95902	1.08659	0.94601	1.08771	1.12929
1	OVCAR3	AZD1775	0.006	1.00066	0.77343	1.0818	1.12234	1.0769	1.01266	1.04306	1.06151
1	OVCAR3	AZD1775	0.019	1.06591	1.07962	0.38092	0.33267	0.94426	0.95993	0.95174	0.93529
1	OVCAR3	AZD1775	0.055	1.03363	0.89826	0.86223	0.91817	0.97785	0.68079	0.90536	0.87704
1	OVCAR3	AZD1775	0.17	0.53417	0.63919	0.66037	0.65996	0.63844	0.45077	0.55944	0.54295
1	OVCAR3	AZD1775	0.5	0.12917	0.11915	0.10232	0.12803	0.1593	0.14129	-1.01631	0.0611
1	PA1	AZD1775	0.00022	0.94235	0.94038	1.08175	1.12029	1.08029	1.0702	1.03379	1.04796
1	PA1	AZD1775	0.00065	0.93134	1.07596	1.15709	0.90997	1.02313	0.95784	0.99554	0.99384
1	PA1	AZD1775	0.002	0.95588	1.11515	1.04979	1.09504	0.87673	0.99942	1.01132	1.01582
1	PA1	AZD1775	0.006	1.00191	0.99141	1.037	1.2066	0.92327	1.01796	1.00461	1.00641
1	PA1	AZD1775	0.019	1.07551	1.20279	0.41083	0.39043	1.1995	1.13311	1.04621	1.06616
1	PA1	AZD1775	0.055	1.07214	1.12673	1.01745	1.08133	1.12083	1.02505	1.03444	1.0489
1	PA1	AZD1775	0.17	0.92865	0.93981	0.89441	0.95166	1.00863	0.93617	0.97018	0.9595
1	PA1	AZD1775	0.5	0.46276	0.65461	0.13238	0.24705	0.40652	0.19998	0.47907	0.4857
1	RKO	AZD1775	0.00022	0.96672	0.93581	1.09163	1.09411	0.90903	0.95674	0.98202	0.97538
1	RKO	AZD1775	0.00065	0.92742	0.96405	1.12257	1.0909	0.91392	0.87677	0.9743	0.965
1	RKO	AZD1775	0.002	1.04072	0.9599	1.1003	1.11263	0.92044	0.93465	1.00014	1.00019
1	RKO	AZD1775	0.006	0.97355	1.00018	1.10338	1.06646	0.91104	0.96516	0.99391	0.99159
1	RKO	AZD1775	0.019	1.20292	1.11709	0.82273	0.87581	1.03877	1.03329	1.01631	1.02287
1	RKO	AZD1775	0.055	1.08987	1.06212	1.01817	1.08093	1.0256	1.10033	1.03183	1.04511
1	RKO	AZD1775	0.17	1.07934	0.96507	0.78294	0.81009	0.97896	0.99875	0.98693	0.98204
1	RKO	AZD1775	0.5	0.45268	0.46754	0.38611	0.39243	0.42562	0.40606	0.59574	0.57097
1	RPMI7951	AZD1775	0.00022	1.01142	0.95705	0.91383	1.04525	1.09767	0.99288	1.00209	1.0029
1	RPMI7951	AZD1775	0.00065	0.93665	0.93881	1.01806	0.97327	1.11821	0.99833	0.98606	0.98086
1	RPMI7951	AZD1775	0.002	1.0344	1.00519	0.89187	0.98893	0.95147	0.9793	0.98439	0.97859
1	RPMI7951	AZD1775	0.006	1.04542	0.91378	1.02113	1.08559	1.01954	1.00025	1.01963	1.02759
1	RPMI7951	AZD1775	0.019	1.00375	1.03612	0.58193	0.60427	0.95707	1.04735	0.98071	0.97361
1	RPMI7951	AZD1775	0.055	0.97796	1.048	0.99164	1.09838	0.98792	1.04158	1.01606	1.02251
1	RPMI7951	AZD1775	0.17	0.78532	0.84001	0.89672	0.88444	0.82665	0.74524	0.82226	0.78161
1	RPMI7951	AZD1775	0.5	0.38245	0.39929	0.2928	0.41932	0.31396	0.28906	-0.02846	0.24033
1	SKMEL30	AZD1775	0.00022	1.12051	0.98131	0.98487	1.24984	1.30135	1.10637	1.05168	1.07427
1	SKMEL30	AZD1775	0.00065	1.11513	0.8517	1.13698	1.19666	1.11081	0.96839	1.05147	1.07396
1	SKMEL30	AZD1775	0.002	1.16437	1.05486	0.84044	1.14201	1.14195	1.08409	1.05149	1.07399
1	SKMEL30	AZD1775	0.006	1.02825	1.05928	1.32888	1.2373	1.18709	0.9354	1.05587	1.08053
1	SKMEL30	AZD1775	0.019	1.21348	1.16364	1.08924	1.08791	1.17856	1.04541	1.05726	1.08261
1	SKMEL30	AZD1775	0.055	1.16164	1.18104	0.98399	0.98523	1.07124	1.22754	1.05297	1.0762
1	SKMEL30	AZD1775	0.17	1.0018	0.93289	0.67878	0.8429	0.91413	1.00061	0.96173	0.94833
1	SKMEL30	AZD1775	0.5	0.29117	0.30895	0.18864	0.19881	0.22363	0.25924	0.31656	0.38773
1	SKMES1	AZD1775	0.00022	0.93387	1.04784	0.95833	1.06736	0.8824	1.03933	0.99938	0.99914
1	SKMES1	AZD1775	0.00065	0.9282	0.95402	1.04267	1.02497	0.97417	1.00791	0.99521	0.99338
1	SKMES1	AZD1775	0.002	0.92497	0.88133	0.94272	1.0593	1.01615	1.06948	0.98894	0.98478
1	SKMES1	AZD1775	0.006	0.91836	1.04249	1.00675	1.06889	0.93465	0.99559	1.00062	1.00086
1	SKMES1	AZD1775	0.019	0.92968	1.01012	0.75991	0.86337	0.97572	1.01734	0.97419	0.96485
1	SKMES1	AZD1775	0.055	1.02727	0.90892	0.97601	1.00545	1.00655	0.94295	0.99505	0.99316
1	SKMES1	AZD1775	0.17	0.35942	0.44172	0.55714	0.52824	0.48177	0.427	0.58847	0.56524
1	SKMES1	AZD1775	0.5	0.12142	0.13327	0.11088	0.13095	0.12952	0.13648	-0.08557	0.22204
1	SKOV3	AZD1775	0.00022	0.91947	1.19891	1.1067	NULL	NULL	NULL	1.0581	1.08388
1	SKOV3	AZD1775	0.00065	1.13845	0.91462	0.94003	NULL	NULL	NULL	0.96456	0.95206
1	SKOV3	AZD1775	0.002	1.01159	1.0281	0.93252	NULL	NULL	NULL	1.0066	1.00919
1	SKOV3	AZD1775	0.006	1.01479	1.02258	1.05398	NULL	NULL	NULL	1.0128	1.0179
1	SKOV3	AZD1775	0.019	1.01042	0.47407	1.1163	NULL	NULL	NULL	1.00594	1.00827
1	SKOV3	AZD1775	0.055	0.98327	1.10124	1.05879	NULL	NULL	NULL	1.03274	1.04643
1	SKOV3	AZD1775	0.17	0.7359	0.88375	0.88005	NULL	NULL	NULL	0.92678	0.90348
1	SKOV3	AZD1775	0.5	0.36507	0.43903	0.508	NULL	NULL	NULL	0.52828	0.51999
1	SW620	AZD1775	0.00022	1.03213	1.09575	0.99348	1.13543	0.93001	1.05627	1.01723	1.02417
1	SW620	AZD1775	0.00065	0.94609	0.88208	1.15024	1.00226	0.96588	1.03112	0.9936	0.99117
1	SW620	AZD1775	0.002	1.04722	1.00556	1.03445	1.11271	0.98452	1.01434	1.0096	1.0134
1	SW620	AZD1775	0.006	0.99308	0.97295	0.96936	0.99856	0.91169	1.05542	0.99318	0.99059
1	SW620	AZD1775	0.019	1.01139	0.9484	0.62634	0.78275	0.96106	0.99057	0.98155	0.97475
1	SW620	AZD1775	0.055	0.97209	1.02474	0.85025	0.90425	0.93184	0.92549	0.97053	0.95997
1	SW620	AZD1775	0.17	0.70702	0.71784	0.70789	0.66265	0.80672	0.5892	0.86216	0.82606
1	SW620	AZD1775	0.5	0.22846	0.28747	0.23578	0.24057	0.26651	0.24507	0.43625	0.45771
1	SW837	AZD1775	0.00022	0.96764	1.22504	1.09164	0.9166	1.24514	1.34187	1.09541	1.14141
1	SW837	AZD1775	0.00065	1.03187	0.66067	1.26349	1.37936	0.93085	1.25568	1.08719	1.12848
1	SW837	AZD1775	0.002	0.89554	1.14556	0.94387	1.05427	1.0406	0.93668	0.99494	0.99301
1	SW837	AZD1775	0.006	0.81867	0.90183	1.0095	1.28977	1.13126	1.12609	1.04258	1.06081
1	SW837	AZD1775	0.019	1.11832	1.05913	0.60095	0.45972	0.94573	1.03837	0.99482	0.99284
1	SW837	AZD1775	0.055	1.05671	0.87411	0.88892	0.76666	0.70345	0.90133	0.91814	0.89272
1	SW837	AZD1775	0.17	1.3194	1.13156	0.58298	0.69433	0.74871	0.64647	0.78814	0.7455
1	SW837	AZD1775	0.5	0.4386	0.65501	0.28724	0.266	0.48966	0.35215	0.3977	0.43389
1	T47D	AZD1775	0.00022	0.90224	0.83009	1.2512	1.02301	1.21862	0.95457	0.98575	0.98044
1	T47D	AZD1775	0.00065	0.76786	0.86595	0.95827	0.84986	1.01782	0.77317	0.8062	0.7644
1	T47D	AZD1775	0.002	0.98317	1.03031	1.06903	1.10594	1.04979	1.10852	1.07297	1.10645
1	T47D	AZD1775	0.006	1.26167	0.96094	1.04736	0.8792	1.26452	1.5597	1.18167	1.2864
1	T47D	AZD1775	0.019	0.89761	1.01186	0.91896	0.51752	1.35095	1.09716	0.95549	0.94016
1	T47D	AZD1775	0.055	0.91583	1.22903	1.08098	1.08997	1.02777	0.53474	1.06696	1.09727
1	T47D	AZD1775	0.17	0.58179	0.85956	1.09978	1.03979	1.33495	0.82698	0.9347	0.91345
1	T47D	AZD1775	0.5	0.70607	0.83058	0.66669	0.54609	0.88992	0.79399	0.63629	0.60398
1	UACC62	AZD1775	0.00022	1.07271	0.97469	1.05578	1.07486	1.11222	1.00447	1.04199	1.05994
1	UACC62	AZD1775	0.00065	0.98515	1.02786	1.17172	0.94655	1.06902	1.08505	1.0319	1.04522
1	UACC62	AZD1775	0.002	1.06631	1.07939	1.10919	0.97987	1.07118	1.03044	1.04484	1.06413
1	UACC62	AZD1775	0.006	1.01446	1.10106	1.10747	1.05951	0.9587	1.00976	1.02449	1.03453
1	UACC62	AZD1775	0.019	1.05088	1.08216	0.98442	0.92082	0.99255	1.09893	1.01448	1.02028
1	UACC62	AZD1775	0.055	1.09561	0.92562	1.0772	1.05243	1.09102	0.99425	1.04235	1.06047
1	UACC62	AZD1775	0.17	0.70726	0.74294	0.79871	0.80581	0.78302	0.76807	0.82859	0.7885
1	UACC62	AZD1775	0.5	0.57646	0.55053	0.51028	0.56883	0.50846	0.5537	0.59945	0.57391
1	UWB1289	AZD1775	0.00022	1.00423	1.05069	1.08655	1.04989	1.08415	1.05404	1.0428	1.06113
1	UWB1289	AZD1775	0.00065	1.05057	0.96635	0.93987	0.77958	1.06879	1.00908	0.98964	0.98574
1	UWB1289	AZD1775	0.002	1.01019	1.07062	1.0122	0.99122	1.03962	0.98628	1.00933	1.01302
1	UWB1289	AZD1775	0.006	1.01643	0.97453	0.91883	0.90974	0.94956	1.01653	0.96755	0.95601
1	UWB1289	AZD1775	0.019	0.90689	0.90944	0.2737	0.39455	0.93097	0.83483	0.88405	0.85151
1	UWB1289	AZD1775	0.055	0.64518	0.71557	0.54322	0.59077	0.54574	0.51545	0.52606	0.51839
1	UWB1289	AZD1775	0.17	0.20118	0.21834	0.17026	0.23846	0.15835	0.18805	-0.37252	0.14916
1	UWB1289	AZD1775	0.5	0.10513	0.13887	0.09955	0.11836	0.12834	0.09564	-0.83778	0.07826
1	UWB1289BRCA1	AZD1775	0.00022	1.05884	0.95116	1.13352	1.05614	1.02347	1.0381	1.02975	1.0421
1	UWB1289BRCA1	AZD1775	0.00065	1.0097	0.9941	1.00735	1.00619	0.99556	1.05583	1.00436	1.00606
1	UWB1289BRCA1	AZD1775	0.002	1.03608	1.05485	0.97662	1.03938	1.04402	1.04079	1.02539	1.03582
1	UWB1289BRCA1	AZD1775	0.006	1.02222	0.95372	1.00131	0.96526	0.9784	0.94704	0.98154	0.97473
1	UWB1289BRCA1	AZD1775	0.019	0.9364	0.98125	0.32763	0.47216	0.87898	0.80421	0.88858	0.85688
1	UWB1289BRCA1	AZD1775	0.055	0.70643	0.83194	0.61552	0.66735	0.60653	0.58846	0.71311	0.67185
1	UWB1289BRCA1	AZD1775	0.17	0.2219	0.22236	0.29419	0.24851	0.22788	0.18622	0.03664	0.26303
1	UWB1289BRCA1	AZD1775	0.5	0.1242	0.14806	0.15397	0.14339	0.14629	0.15816	-0.23797	0.17975
1	VCAP	AZD1775	0.00022	1.05853	1.0309	1.06694	0.98397	1.03535	1.02502	1.02985	1.04225
1	VCAP	AZD1775	0.00065	0.99521	1.06041	1.14524	0.9394	1.12515	0.95674	1.02512	1.03544
1	VCAP	AZD1775	0.002	1.03578	0.9847	1.04472	1.01057	0.95688	0.91823	0.99784	0.99701
1	VCAP	AZD1775	0.006	1.15199	1.06797	1.05402	1.0389	1.0408	1.02002	1.04242	1.06057
1	VCAP	AZD1775	0.019	1.17168	0.82938	0.98206	1.03665	1.07575	1.0862	1.05008	1.07189
1	VCAP	AZD1775	0.055	1.12324	1.07132	1.07441	1.07714	1.0215	0.95525	1.06442	1.09341
1	VCAP	AZD1775	0.17	0.93459	0.9597	0.94596	0.96025	1.07166	0.94881	0.95712	0.94229
1	VCAP	AZD1775	0.5	0.14566	0.22117	0.09778	0.1157	0.22676	0.14619	-0.76264	0.08685
1	ZR751	AZD1775	0.00022	0.91264	0.8006	1.04658	1.08337	1.06689	1.16973	1.06673	1.09692
1	ZR751	AZD1775	0.00065	0.73166	0.95904	0.7694	0.65824	0.81664	0.99091	0.71954	0.67787
1	ZR751	AZD1775	0.002	0.91484	0.88118	0.95157	0.96477	0.82066	0.89579	0.87971	0.8464
1	ZR751	AZD1775	0.006	0.84388	0.78841	0.75115	0.89777	0.94739	0.76237	0.7543	0.71133
1	ZR751	AZD1775	0.019	0.84566	0.87494	0.77319	0.86169	0.80676	0.81999	0.77876	0.73587
1	ZR751	AZD1775	0.055	0.76666	0.98911	0.80994	0.97864	0.96872	0.98619	0.96774	0.95626
1	ZR751	AZD1775	0.17	0.78256	0.88806	0.76023	0.87809	0.70353	0.74861	0.68612	0.64718
1	ZR751	AZD1775	0.5	0.77759	0.78837	0.64698	0.69451	0.71877	0.68147	0.58007	0.5587
1	A2058	BEZ-235	0.00019	0.98442	1.01703	1.02488	1.09818	1.07001	1.15791	1.02353	1.03316
1	A2058	BEZ-235	0.00055	0.92673	0.99407	1.01508	1.10928	1.06254	1.13891	1.01933	1.02716
1	A2058	BEZ-235	0.0017	0.93673	1.01711	0.95213	1.09753	1.01859	1.15662	1.00898	1.01253
1	A2058	BEZ-235	0.005	0.8399	0.97515	0.92993	1.06928	1.02702	1.03812	1.00055	1.00076
1	A2058	BEZ-235	0.015	1	0.28486	0.7222	0.71277	0.83647	0.97727	0.87344	0.83908
1	A2058	BEZ-235	0.045	0.3398	0.35529	0.34786	0.36263	0.78868	0.10026	0.46935	0.4792
1	A2058	BEZ-235	0.14	0.39793	0.28378	0.22569	0.21766	0.308	0.27053	0.34862	0.40535
1	A2058	BEZ-235	0.4	0.19368	0.17544	0.17609	0.16395	0.17907	0.42292	0.12263	0.29633
1	A2780	BEZ-235	0.00019	1.0332	1.00772	1.01318	0.9623	0.99742	1.01987	1.00404	1.00562
1	A2780	BEZ-235	0.00055	1.01295	0.96496	0.95423	0.83151	1.00662	0.95533	0.9842	0.97833
1	A2780	BEZ-235	0.0017	0.98906	0.90358	0.90625	0.82211	0.98592	0.92547	0.96587	0.95379
1	A2780	BEZ-235	0.005	0.697	0.78683	0.92013	0.81678	0.79021	0.64656	0.90773	0.87993
1	A2780	BEZ-235	0.015	0.91546	0.99092	0.49331	0.38657	0.77802	0.6695	0.87445	0.84026
1	A2780	BEZ-235	0.045	0.14233	0.13856	0.14734	0.1386	0.46675	0.43779	0.24967	0.35339
1	A2780	BEZ-235	0.14	0.20806	0.20427	0.08804	0.07295	0.13355	0.12992	0.21285	0.33581
1	A2780	BEZ-235	0.4	0.09195	0.08603	0.09754	0.08588	0.08099	0.0761	0.04704	0.26685
1	A375	BEZ-235	0.00019	0.88218	0.84121	1.0651	1.00508	1.09945	1.05477	1.01409	1.01972
1	A375	BEZ-235	0.00055	0.94249	0.82913	1.09354	1.08068	0.95206	1.13542	1.00776	1.01082
1	A375	BEZ-235	0.0017	0.90097	0.81921	1.00558	1.06402	1.03562	1.10912	1.00974	1.01359
1	A375	BEZ-235	0.005	0.91001	0.85029	1.12296	1.13374	1.06549	1.07231	1.03184	1.04513
1	A375	BEZ-235	0.015	0.86343	0.90319	0.8848	0.82562	1.05764	0.92985	0.94646	0.92847
1	A375	BEZ-235	0.045	0.47879	0.46645	0.41896	0.4349	0.84666	0.88314	0.64188	0.60868
1	A375	BEZ-235	0.14	0.56051	0.57166	0.29848	0.2467	0.41699	0.37381	0.55663	0.54083
1	A375	BEZ-235	0.4	0.19485	0.18141	0.20511	0.18342	0.20096	0.18628	0.20787	0.3335
1	A427	BEZ-235	0.00019	0.92611	0.81108	1.10032	NULL	NULL	NULL	0.95848	0.94407
1	A427	BEZ-235	0.00055	1.04142	0.95829	1.16923	NULL	NULL	NULL	1.02195	1.0309
1	A427	BEZ-235	0.0017	0.96516	0.99278	1.15938	NULL	NULL	NULL	0.99608	0.99458
1	A427	BEZ-235	0.005	0.86801	0.78659	0.94873	NULL	NULL	NULL	0.92343	0.89929
1	A427	BEZ-235	0.015	0.37805	0.83185	0.907	NULL	NULL	NULL	0.90041	0.87105
1	A427	BEZ-235	0.045	0.61838	0.67762	0.85593	NULL	NULL	NULL	0.78948	0.74689
1	A427	BEZ-235	0.14	0.68895	0.39368	0.50893	NULL	NULL	NULL	0.63462	0.60259
1	A427	BEZ-235	0.4	0.37143	0.35308	0.38555	NULL	NULL	NULL	0.46424	0.47582
1	CAOV3	BEZ-235	0.00019	1.04684	0.98272	0.99797	0.80637	1.18972	1.14455	1.02887	1.04083
1	CAOV3	BEZ-235	0.00055	1.00118	0.87488	1.18921	1.0197	1.19626	1.12772	1.09265	1.13705
1	CAOV3	BEZ-235	0.0017	1.04375	1.19716	0.90847	1.0395	1.04747	0.99503	1.05312	1.07642
1	CAOV3	BEZ-235	0.005	0.73448	0.85629	1.0664	0.99446	1.03625	0.85031	0.89898	0.86932
1	CAOV3	BEZ-235	0.015	0.97669	0.97868	0.73201	0.61065	0.81142	0.93164	0.82088	0.78012
1	CAOV3	BEZ-235	0.045	0.57382	0.58105	0.62106	0.51654	0.75953	0.86725	0.33686	0.3988
1	CAOV3	BEZ-235	0.14	0.70403	0.54584	0.40133	0.41656	0.53745	0.5585	0.20128	0.33046
1	CAOV3	BEZ-235	0.4	0.32529	0.33093	0.28028	0.27863	0.33683	0.32275	-0.46805	0.13066
1	COLO320DM	BEZ-235	0.00019	0.91127	1.04754	1.01618	0.97428	0.99286	0.91973	0.99402	0.99174
1	COLO320DM	BEZ-235	0.00055	1.05192	0.98493	1.12721	0.85658	1.25844	1.04762	1.01753	1.0246
1	COLO320DM	BEZ-235	0.0017	1.2475	0.96973	0.97678	0.94353	0.92277	1.04715	0.99022	0.98653
1	COLO320DM	BEZ-235	0.005	0.84447	0.8906	1.08539	0.87789	1.07441	0.97858	0.97559	0.96673
1	COLO320DM	BEZ-235	0.015	0.93886	1.05661	0.84717	0.64704	1.00752	0.8562	0.96099	0.94736
1	COLO320DM	BEZ-235	0.045	0.50769	0.43141	0.56089	0.39167	0.88079	0.89236	0.77384	0.73087
1	COLO320DM	BEZ-235	0.14	0.67491	0.52686	0.3544	0.3243	0.55076	0.5591	0.77688	0.73395
1	COLO320DM	BEZ-235	0.4	0.26805	0.23253	0.25569	0.23713	0.24542	0.21003	0.487	0.49107
1	DLD1	BEZ-235	0.00019	0.90797	0.8782	1.14777	1.05796	1.01042	1.00695	1.00333	1.00463
1	DLD1	BEZ-235	0.00055	0.94593	0.9179	1.12386	1.04384	1.0206	1.0261	1.0089	1.01241
1	DLD1	BEZ-235	0.0017	0.929	0.93551	1.07694	0.98353	1.09251	1.01109	0.99896	0.99856
1	DLD1	BEZ-235	0.005	0.8979	0.98023	0.96866	1.07191	1.07876	1.03579	1.00308	1.00428
1	DLD1	BEZ-235	0.015	0.08398	1.04371	0.67921	0.75136	0.82667	0.98189	0.90862	0.88102
1	DLD1	BEZ-235	0.045	0.31104	0.53523	0.32617	0.37501	0.71442	0.67498	0.69643	0.6565
1	DLD1	BEZ-235	0.14	0.45641	0.48512	0.3205	0.22949	0.03578	0.31477	0.55774	0.54167
1	DLD1	BEZ-235	0.4	0.22312	0.22777	0.18584	0.24338	0.15802	0.19926	0.40034	0.43548
1	EFM192B	BEZ-235	0.00019	0.94062	1.00819	1.01262	1.06347	1.00033	1.08576	1.0094	1.01312
1	EFM192B	BEZ-235	0.00055	0.93932	1.00969	0.93554	1.03911	1.08716	1.21321	1.02188	1.0308
1	EFM192B	BEZ-235	0.0017	0.96997	0.94688	1.05694	1.06232	1.04077	1.17336	1.04329	1.06185
1	EFM192B	BEZ-235	0.005	1.04422	0.88537	0.93307	1.02357	1.27899	0.92659	0.98011	0.9728
1	EFM192B	BEZ-235	0.015	0.88127	0.77616	0.74914	0.76711	0.94663	0.91508	0.82949	0.78948
1	EFM192B	BEZ-235	0.045	0.39887	0.38734	0.34506	0.36002	0.75069	0.72221	0.15269	0.30894
1	EFM192B	BEZ-235	0.14	0.55653	0.52882	0.17623	0.15474	0.41307	0.37991	0.16046	0.31228
1	EFM192B	BEZ-235	0.4	0.07826	0.09893	0.08493	0.07526	0.09454	0.10366	-1.18785	0.04817
1	ES2	BEZ-235	0.00019	0.9418	1.03697	0.95945	1.03875	1.02307	1.06374	1.01448	1.02028
1	ES2	BEZ-235	0.00055	0.92898	0.76125	1.09215	1.05832	0.9951	0.98006	0.99388	0.99155
1	ES2	BEZ-235	0.0017	0.9814	1.04231	1.02599	0.99863	1.00645	1.12941	1.00788	1.01098
1	ES2	BEZ-235	0.005	0.7562	0.79963	1.03508	1.00719	0.92179	0.91612	0.95862	0.94425
1	ES2	BEZ-235	0.015	0.98092	0.91578	0.89111	0.91361	0.83494	0.77017	0.9497	0.93265
1	ES2	BEZ-235	0.045	0.57964	0.56266	0.56468	0.49756	1.05287	0.93869	0.72666	0.68459
1	ES2	BEZ-235	0.14	0.63931	0.67937	0.37516	0.36739	0.55128	0.47685	0.67425	0.63662
1	ES2	BEZ-235	0.4	0.24415	0.26879	0.26909	0.23918	0.22713	0.2456	0.31119	0.38485
1	HCT116	BEZ-235	0.00019	0.86149	0.83873	0.97004	0.97605	1.02659	1.02167	0.98651	0.98147
1	HCT116	BEZ-235	0.00055	1.07505	0.7686	1.002	1.06748	0.93969	1.00827	1.00253	1.00351
1	HCT116	BEZ-235	0.0017	0.85918	0.81435	0.9528	0.95449	1.03892	1.03902	0.97657	0.96804
1	HCT116	BEZ-235	0.005	0.89926	0.83699	1.03346	1.08491	1.01516	1.11279	1.01186	1.01658
1	HCT116	BEZ-235	0.015	0.90282	0.94516	0.98388	1.07461	0.88795	0.83456	0.96098	0.94734
1	HCT116	BEZ-235	0.045	1.00206	1.02974	1.02273	0.91619	0.83784	0.76023	0.9794	0.97185
1	HCT116	BEZ-235	0.14	1.01117	0.99236	0.65477	0.67551	0.93749	0.92879	0.96584	0.95375
1	HCT116	BEZ-235	0.4	0.55901	0.48393	0.48388	0.42622	0.50493	0.53196	0.6523	0.61754
1	HT144	BEZ-235	0.00019	0.92792	0.94773	1.02451	1.082	1.10438	1.07239	1.03463	1.04918
1	HT144	BEZ-235	0.00055	0.95657	0.93362	0.98155	1.01416	0.99625	0.99724	0.99183	0.98874
1	HT144	BEZ-235	0.0017	0.96036	0.96255	0.99823	1.00763	1.07391	1.04132	1.00214	1.00297
1	HT144	BEZ-235	0.005	0.89048	0.94516	1.12414	0.98527	0.96463	1.00197	0.98143	0.97459
1	HT144	BEZ-235	0.015	0.90937	0.91205	0.90973	0.88433	0.86409	0.89924	0.92637	0.90296
1	HT144	BEZ-235	0.045	0.57589	0.5531	0.53517	0.50814	0.86223	0.76438	0.58141	0.55974
1	HT144	BEZ-235	0.14	0.7511	0.71285	0.38428	0.33955	0.56691	0.5042	0.54287	0.53062
1	HT144	BEZ-235	0.4	0.33321	0.34882	0.30404	0.29872	0.33893	0.28381	0.16275	0.31327
1	HT29	BEZ-235	0.00019	0.95585	0.9543	1.1511	0.99938	0.97863	1.14116	0.99516	0.99331
1	HT29	BEZ-235	0.00055	0.94265	0.99114	0.97088	0.91806	1.13357	1.08514	0.99162	0.98845
1	HT29	BEZ-235	0.0017	0.89925	0.96943	1.04457	1.02361	0.96559	1.12421	0.99848	0.9979
1	HT29	BEZ-235	0.005	0.81162	0.90101	1.03496	1.07406	0.9267	0.84471	0.96061	0.94686
1	HT29	BEZ-235	0.015	0.9646	0.95527	0.71315	0.61363	0.92697	0.90565	0.96179	0.94841
1	HT29	BEZ-235	0.045	0.54334	0.51656	0.41718	0.44131	0.77743	0.86963	0.72238	0.68054
1	HT29	BEZ-235	0.14	0.69622	0.53818	0.32971	0.35615	0.47551	0.51906	0.69456	0.6548
1	HT29	BEZ-235	0.4	0.36369	0.29199	0.26668	0.29852	0.35079	0.31356	0.48231	0.48789
1	KPL1	BEZ-235	0.00019	0.9552	0.81749	0.97817	1.00508	1.21647	1.0833	0.99422	0.99202
1	KPL1	BEZ-235	0.00055	0.89366	0.88756	1.18844	0.98077	1.19199	1.15548	1.0453	1.06481
1	KPL1	BEZ-235	0.0017	0.94001	0.93287	1.04994	1.04401	1.06658	1.00798	1.01764	1.02476
1	KPL1	BEZ-235	0.005	0.68246	0.7016	0.78689	0.87769	0.87487	0.92669	0.87264	0.83815
1	KPL1	BEZ-235	0.015	1.03784	0.86619	0.47774	0.44838	0.72631	0.65279	0.74447	0.70171
1	KPL1	BEZ-235	0.045	0.38425	0.28438	0.36668	0.32685	0.51235	0.48925	0.32659	0.39316
1	KPL1	BEZ-235	0.14	0.3462	0.32536	0.2388	0.2862	0.35783	0.34648	0.24979	0.35345
1	KPL1	BEZ-235	0.4	0.23581	0.29188	0.20174	0.20327	0.22458	0.21272	-0.04511	0.23484
1	LNCAP	BEZ-235	0.00019	0.99461	0.92052	0.74785	0.96682	0.81982	1.19018	0.96447	0.95194
1	LNCAP	BEZ-235	0.00055	0.80113	0.85608	1.13575	0.74031	0.72388	1.17614	0.88479	0.85239
1	LNCAP	BEZ-235	0.0017	0.85524	1.20625	0.8185	0.60452	0.84722	0.91713	0.9013	0.87212
1	LNCAP	BEZ-235	0.005	0.80684	0.73411	0.44357	0.49523	1.00814	1.13552	0.84022	0.80131
1	LNCAP	BEZ-235	0.015	0.89425	1.1726	0.45526	0.70813	0.66739	0.69112	0.78111	0.73827
1	LNCAP	BEZ-235	0.045	0.19483	0.24423	0.17134	0.26216	0.467	0.87711	0.15826	0.31133
1	LNCAP	BEZ-235	0.14	0.22938	0.42639	0.15112	0.08467	0.17703	0.15065	-0.10756	0.21537
1	LNCAP	BEZ-235	0.4	0.14386	0.09836	0.14913	0.13098	0.19116	0.14081	-0.19471	0.19086
1	LOVO	BEZ-235	0.00019	0.86026	1.02259	1.01481	0.95031	1.06126	0.96628	0.99543	0.99368
1	LOVO	BEZ-235	0.00055	0.90843	0.99683	0.74657	1.05333	1.08035	0.88633	0.97664	0.96813
1	LOVO	BEZ-235	0.0017	1.01622	0.85761	0.79047	0.82414	1.03835	0.71251	0.91658	0.89079
1	LOVO	BEZ-235	0.005	0.43137	0.67516	0.60949	0.88094	0.53816	0.59216	0.75479	0.71182
1	LOVO	BEZ-235	0.015	0.55986	0.84596	0.29202	0.32139	0.61152	0.72903	0.74251	0.6998
1	LOVO	BEZ-235	0.045	0.1855	0.18978	0.20347	0.17149	0.43855	0.40465	0.21714	0.33781
1	LOVO	BEZ-235	0.14	0.23571	0.35825	0.1419	0.12047	0.2673	0.27472	0.33563	0.39812
1	LOVO	BEZ-235	0.4	0.18626	0.16338	0.13163	0.10548	0.14551	0.16612	0.10092	0.28754
1	MDAMB436	BEZ-235	0.00019	1.06583	0.93484	0.97296	0.96233	1.06507	0.92525	0.98159	0.9748
1	MDAMB436	BEZ-235	0.00055	0.91953	0.9343	0.9481	0.9736	1.09409	1.02725	0.97765	0.96949
1	MDAMB436	BEZ-235	0.0017	0.97621	0.93119	0.82063	0.85417	0.92833	0.9176	0.95513	0.93969
1	MDAMB436	BEZ-235	0.005	0.70677	0.69722	0.86463	0.84639	0.77498	0.75993	0.85185	0.81434
1	MDAMB436	BEZ-235	0.015	0.8314	0.78536	0.65708	0.65707	0.78109	0.77546	0.85968	0.82323
1	MDAMB436	BEZ-235	0.045	0.57786	0.53967	0.55275	0.53871	0.71356	0.70218	0.68073	0.64236
1	MDAMB436	BEZ-235	0.14	0.59629	0.56544	0.48489	0.49112	0.50822	0.56135	0.64965	0.61527
1	MDAMB436	BEZ-235	0.4	0.46813	0.45378	0.46786	0.37588	0.40179	0.37526	0.52469	0.51741
1	MSTO	BEZ-235	0.00019	1.17716	0.53984	0.89161	1.07853	0.89663	1.238	0.99475	0.99275
1	MSTO	BEZ-235	0.00055	1.05357	0.78145	0.87668	1.18293	0.90588	1.09604	0.99139	0.98813
1	MSTO	BEZ-235	0.0017	0.91046	1.09731	0.81295	1.14099	0.80193	1.03213	0.98775	0.98316
1	MSTO	BEZ-235	0.005	0.89438	0.71856	0.88245	1.15559	0.92417	1.15858	0.96002	0.94608
1	MSTO	BEZ-235	0.015	1.00089	1.01573	0.6656	0.98639	0.66933	0.82913	0.95932	0.94517
1	MSTO	BEZ-235	0.045	0.36011	0.15381	0.38868	0.21089	0.59303	0.93953	0.587	0.56409
1	MSTO	BEZ-235	0.14	0.3421	0.45449	0.13522	0.05016	0.30609	0.13063	0.36472	0.4145
1	MSTO	BEZ-235	0.4	0.05707	0.01575	0.04095	0.07794	0.0518	0.02727	-0.29096	0.16702
1	NCIH1650	BEZ-235	0.00019	0.92397	1.00682	0.9995	1.01614	0.98635	0.94248	0.99452	0.99243
1	NCIH1650	BEZ-235	0.00055	0.93591	1.07875	1.0031	0.97923	1.01677	0.97548	0.99314	0.99054
1	NCIH1650	BEZ-235	0.0017	1.03708	1.02871	0.96826	1.03945	0.97834	0.97444	1.00272	1.00378
1	NCIH1650	BEZ-235	0.005	1.00411	1.03508	1.05159	1.09288	1.01447	0.96759	1.0189	1.02655
1	NCIH1650	BEZ-235	0.015	0.91377	0.9018	0.77533	0.65512	0.91264	0.89529	0.91735	0.89174
1	NCIH1650	BEZ-235	0.045	0.56854	0.62274	0.56284	0.56491	0.78302	0.73909	0.59973	0.57413
1	NCIH1650	BEZ-235	0.14	0.61241	0.70173	0.44227	0.43623	0.51866	0.55889	0.5222	0.51563
1	NCIH1650	BEZ-235	0.4	0.48104	0.45561	0.45582	0.41142	0.47628	0.40829	0.39287	0.43099
1	NCIH2122	BEZ-235	0.00019	1.09286	0.98632	1.00611	1.0003	1.09822	1.06371	1.0155	1.02172
1	NCIH2122	BEZ-235	0.00055	1.06969	0.99752	1.06845	1.08054	1.1328	1.08142	1.03272	1.0464
1	NCIH2122	BEZ-235	0.0017	1.06297	0.97967	1.0337	0.95338	1.10463	0.95869	1.00301	1.00418
1	NCIH2122	BEZ-235	0.005	1.10072	0.99228	1.13308	1.1001	1.0762	0.99218	1.03816	1.05433
1	NCIH2122	BEZ-235	0.015	0.98652	0.91638	0.88693	0.8353	0.89895	0.87647	0.94885	0.93155
1	NCIH2122	BEZ-235	0.045	0.40945	0.38493	0.37291	0.3648	0.86354	0.82707	0.5829	0.56089
1	NCIH2122	BEZ-235	0.14	0.83896	0.59862	0.15331	0.12425	0.36291	0.37257	0.5481	0.53448
1	NCIH2122	BEZ-235	0.4	0.10698	0.10703	0.11175	0.09925	0.09983	0.09777	-0.02505	0.24147
1	NCIH23	BEZ-235	0.00019	0.99756	1.12509	1.00196	1.10164	1.0759	1.01081	1.0199	1.02797
1	NCIH23	BEZ-235	0.00055	0.93768	1.02438	1.06626	1.05994	1.04223	1.02056	1.01535	1.02151
1	NCIH23	BEZ-235	0.0017	0.91324	1.07795	0.91314	1.00783	0.97591	0.94143	0.98022	0.97295
1	NCIH23	BEZ-235	0.005	0.83879	0.93013	0.94884	0.92309	1.01145	1.00836	0.97074	0.96025
1	NCIH23	BEZ-235	0.015	0.0703	0.91281	0.72056	0.66372	0.87129	0.86823	0.89212	0.86109
1	NCIH23	BEZ-235	0.045	0.47525	0.53434	0.44343	0.38163	0.74225	0.8417	0.67959	0.64135
1	NCIH23	BEZ-235	0.14	0.01385	0.56535	0.33075	0.31048	0.40401	0.40215	0.52946	0.52084
1	NCIH23	BEZ-235	0.4	0.20824	0.19516	0.20084	0.20856	0.24663	0.22618	0.26491	0.36094
1	NCIH460	BEZ-235	0.00019	0.87805	0.91444	1.00325	1.07286	1.03453	1.0909	1.01234	1.01725
1	NCIH460	BEZ-235	0.00055	0.90265	0.78888	0.90691	0.92582	0.85021	0.80668	0.91302	0.88641
1	NCIH460	BEZ-235	0.0017	0.87527	0.84385	0.92671	0.96498	1.01546	1.0085	0.96328	0.95037
1	NCIH460	BEZ-235	0.005	0.80532	0.86068	0.94914	0.97805	0.82157	0.79101	0.8859	0.8537
1	NCIH460	BEZ-235	0.015	0.95921	0.89542	0.94053	0.93402	0.87382	0.93916	0.9568	0.94187
1	NCIH460	BEZ-235	0.045	0.75678	0.8288	0.70468	0.71974	0.78502	0.87292	0.82841	0.7883
1	NCIH460	BEZ-235	0.14	0.94753	0.87989	0.53214	0.50311	0.76752	0.7886	0.8345	0.79499
1	NCIH460	BEZ-235	0.4	0.41377	0.40766	0.38998	0.3761	0.40575	0.39271	0.39446	0.43195
1	NCIH520	BEZ-235	0.00019	1.16415	0.94136	1.20726	0.80774	1.07668	0.89215	1.00355	1.00493
1	NCIH520	BEZ-235	0.00055	0.88491	0.92486	1.22766	1.00153	0.82576	0.98027	0.9808	0.97373
1	NCIH520	BEZ-235	0.0017	1.08579	0.79664	0.9165	0.81023	0.94926	0.87305	0.95608	0.94093
1	NCIH520	BEZ-235	0.005	0.83656	0.69205	0.938	0.81072	0.83829	0.79866	0.92336	0.8992
1	NCIH520	BEZ-235	0.015	0.87655	0.92165	0.61741	0.55949	1.12681	0.85815	0.94378	0.92502
1	NCIH520	BEZ-235	0.045	0.18674	0.25821	0.18471	0.13506	0.47266	0.58736	0.40632	0.43911
1	NCIH520	BEZ-235	0.14	0.3076	0.37732	0.12324	0.1357	0.20573	0.14351	0.31064	0.38456
1	NCIH520	BEZ-235	0.4	0.14	0.08381	0.12376	0.12029	0.15991	0.10705	0.16905	0.31602
1	OCUBM	BEZ-235	0.00019	0.97138	0.93567	1.07537	1.05565	0.97421	0.95855	0.96889	0.95779
1	OCUBM	BEZ-235	0.00055	0.8476	1.00934	0.95117	1.06031	0.98442	0.91603	0.96309	0.95012
1	OCUBM	BEZ-235	0.0017	1.01292	0.95785	1.03247	1.01778	1.01834	0.96543	1.01718	1.0241
1	OCUBM	BEZ-235	0.005	0.63596	0.68743	0.81502	0.86074	0.89218	0.91844	0.80054	0.75843
1	OCUBM	BEZ-235	0.015	0.93094	0.83925	0.54765	0.45876	0.72301	0.75936	0.66226	0.62612
1	OCUBM	BEZ-235	0.045	0.25011	0.26203	0.24492	0.18325	0.58915	0.6167	-0.53623	0.11888
1	OCUBM	BEZ-235	0.14	0.39176	0.33731	0.09278	0.06578	0.19872	0.19875	-0.8221	0.07998
1	OCUBM	BEZ-235	0.4	0.02659	0.02401	0.03624	0.01278	0.01393	0.01725	-3.3765	0.00232
1	OV90	BEZ-235	0.00019	0.86915	0.9444	0.97696	1.0683	0.96285	1.07289	0.97581	0.96702
1	OV90	BEZ-235	0.00055	0.94968	0.93187	1.02733	1.12707	1.04912	0.97022	0.99903	0.99866
1	OV90	BEZ-235	0.0017	0.93025	0.84745	0.90517	0.9749	1.02339	1.01442	0.96154	0.94808
1	OV90	BEZ-235	0.005	0.87064	0.95091	1.00283	0.97232	0.83429	0.93486	0.95345	0.93751
1	OV90	BEZ-235	0.015	0.99466	0.84412	0.63059	0.6756	0.72643	0.8887	0.80869	0.76704
1	OV90	BEZ-235	0.045	0.45705	0.4785	0.34865	0.49863	0.59118	0.67775	0.43308	0.4557
1	OV90	BEZ-235	0.14	0.36145	0.35475	0.33246	0.37596	0.39087	0.27442	0.18721	0.32408
1	OV90	BEZ-235	0.4	0.28801	0.27032	0.26783	0.2703	0.26153	0.22789	-0.03902	0.23684
1	OVCAR3	BEZ-235	0.00019	0.94078	1.08335	0.98349	1.03838	1.0171	1.10097	1.0269	1.038
1	OVCAR3	BEZ-235	0.00055	0.98024	1.04064	1.07708	1.0042	0.97528	0.96147	0.99232	0.98941
1	OVCAR3	BEZ-235	0.0017	0.89907	1.01608	1.15532	0.97113	0.90859	0.95634	0.96368	0.9509
1	OVCAR3	BEZ-235	0.005	0.88736	0.8447	0.91053	0.90518	0.80012	0.84198	0.8586	0.82199
1	OVCAR3	BEZ-235	0.015	0.80331	0.85444	0.683	0.68858	0.85885	0.84482	0.80978	0.7682
1	OVCAR3	BEZ-235	0.045	0.51354	0.51741	0.46531	0.44507	0.76244	0.72634	0.34857	0.40532
1	OVCAR3	BEZ-235	0.14	0.52289	0.68483	0.32908	0.27345	0.47549	0.48607	0.28006	0.3686
1	OVCAR3	BEZ-235	0.4	0.19226	0.19857	0.18854	0.17168	0.19063	0.17919	-0.63473	0.1037
1	PA1	BEZ-235	0.00019	0.89713	0.78513	0.97972	1.08448	1.17429	1.23841	1.01472	1.02062
1	PA1	BEZ-235	0.00055	0.83562	0.86868	1.14563	0.95609	1.0674	1.05947	1.00361	1.00502
1	PA1	BEZ-235	0.0017	0.81524	1.08813	1.04906	0.98657	0.9044	1.21588	1.00823	1.01147
1	PA1	BEZ-235	0.005	0.74686	0.81401	0.95531	0.87836	1.07364	1.02886	0.95956	0.94548
1	PA1	BEZ-235	0.015	0.82118	0.94154	0.72435	0.76073	0.85821	0.89197	0.91863	0.89333
1	PA1	BEZ-235	0.045	0.54308	0.39209	0.33329	0.43934	0.74148	0.80469	0.66891	0.63192
1	PA1	BEZ-235	0.14	0.58674	0.59556	0.28554	0.2058	0.39931	0.33162	0.53119	0.52209
1	PA1	BEZ-235	0.4	0.13685	0.23394	0.14781	0.19284	0.17459	0.16315	0.17161	0.31715
1	RKO	BEZ-235	0.00019	0.79704	0.75376	0.95408	1.03025	1.13321	1.05258	0.99638	0.99499
1	RKO	BEZ-235	0.00055	0.78716	0.78282	0.99972	0.98326	1.09925	1.07051	0.99606	0.99455
1	RKO	BEZ-235	0.0017	0.87248	0.7745	0.89342	0.93563	1.02321	0.97933	0.95883	0.94452
1	RKO	BEZ-235	0.005	0.78355	0.72862	0.97746	0.9988	0.98919	0.95666	0.98457	0.97884
1	RKO	BEZ-235	0.015	0.89778	0.8621	0.75448	0.64931	0.72539	0.7372	0.8649	0.8292
1	RKO	BEZ-235	0.045	0.46036	0.45493	0.46887	0.40684	0.67353	0.62885	0.64684	0.61288
1	RKO	BEZ-235	0.14	0.53346	0.55522	0.38223	0.38487	0.45518	0.49825	0.65868	0.62302
1	RKO	BEZ-235	0.4	0.35881	0.33843	0.33839	0.32095	0.32318	0.30408	0.49031	0.49333
1	RPMI7951	BEZ-235	0.00019	1.02463	1.00355	1.01271	1.0152	0.94624	0.96843	1.00789	1.011
1	RPMI7951	BEZ-235	0.00055	0.94287	0.97676	0.9871	1.00208	1.06197	1.0012	0.99428	0.9921
1	RPMI7951	BEZ-235	0.0017	0.93899	1.03708	1.00748	1.00824	1.0516	0.95143	1.00763	1.01063
1	RPMI7951	BEZ-235	0.005	0.7088	0.8994	0.95726	0.97433	0.97082	0.84103	0.9275	0.90438
1	RPMI7951	BEZ-235	0.015	0.87277	0.88167	0.68716	0.63803	0.83025	0.80461	0.80348	0.76152
1	RPMI7951	BEZ-235	0.045	0.36408	0.38108	0.33726	0.32346	0.63588	0.64481	0.03752	0.26335
1	RPMI7951	BEZ-235	0.14	0.55079	0.49612	0.2486	0.23026	0.34846	0.30127	-0.09607	0.21883
1	RPMI7951	BEZ-235	0.4	0.23013	0.22053	0.20191	0.19767	0.21288	0.19806	-0.53361	0.11931
1	SKMEL30	BEZ-235	0.00019	0.93878	0.88917	1.23001	1.04465	0.95023	1.07939	0.99877	0.9983
1	SKMEL30	BEZ-235	0.00055	0.89599	0.87172	0.96288	1.02562	1.23268	1.1097	0.99723	0.99617
1	SKMEL30	BEZ-235	0.0017	0.93785	0.86026	1.14967	1.14414	1.19518	1.11578	1.05876	1.08487
1	SKMEL30	BEZ-235	0.005	0.91922	0.89056	1.0199	1.08928	1.24308	1.18949	1.02556	1.03607
1	SKMEL30	BEZ-235	0.015	1.00758	1.12122	0.99966	1.02455	0.96734	0.92747	1.00174	1.00242
1	SKMEL30	BEZ-235	0.045	0.73298	0.60997	0.46444	0.64999	0.78418	0.80782	0.82258	0.78196
1	SKMEL30	BEZ-235	0.14	0.72225	0.74967	0.28651	0.29488	0.54075	0.47826	0.67571	0.63791
1	SKMEL30	BEZ-235	0.4	0.24312	0.28389	0.18599	0.22073	0.19591	0.19308	0.2456	0.3514
1	SKMES1	BEZ-235	0.00019	0.85046	0.92387	1.07898	1.04687	1.06821	1.03642	1.02173	1.03058
1	SKMES1	BEZ-235	0.00055	1.01877	1.00439	1.06083	0.96568	0.96744	1.05008	1.00613	1.00853
1	SKMES1	BEZ-235	0.0017	0.88623	0.99483	1.03967	0.95324	0.99409	0.96416	0.98876	0.98454
1	SKMES1	BEZ-235	0.005	0.89342	0.91653	1.01195	0.99551	1.00715	0.89317	0.97605	0.96734
1	SKMES1	BEZ-235	0.015	0.94593	0.97383	0.86089	0.88016	0.83559	0.93574	0.94857	0.93119
1	SKMES1	BEZ-235	0.045	0.4774	0.55051	0.53039	0.48592	0.85943	0.83672	0.67228	0.63488
1	SKMES1	BEZ-235	0.14	0.66574	0.75292	0.25166	0.24343	0.44375	0.47401	0.58515	0.56265
1	SKMES1	BEZ-235	0.4	0.1822	0.18507	0.18247	0.1644	0.17118	0.28058	0.09364	0.28465
1	SKOV3	BEZ-235	0.00019	1.03324	1.09378	1.04328	NULL	NULL	NULL	1.02428	1.03423
1	SKOV3	BEZ-235	0.00055	0.98767	1.07772	0.98627	NULL	NULL	NULL	0.99289	0.99019
1	SKOV3	BEZ-235	0.0017	0.96958	0.9935	0.90515	NULL	NULL	NULL	0.9823	0.97576
1	SKOV3	BEZ-235	0.005	0.81232	1.05335	0.93537	NULL	NULL	NULL	0.96171	0.9483
1	SKOV3	BEZ-235	0.015	0.97929	0.7322	0.79794	NULL	NULL	NULL	0.87065	0.83584
1	SKOV3	BEZ-235	0.045	0.27819	0.25874	0.74888	NULL	NULL	NULL	0.26682	0.36189
1	SKOV3	BEZ-235	0.14	0.58699	0.23206	0.28761	NULL	NULL	NULL	0.28591	0.3716
1	SKOV3	BEZ-235	0.4	0.22953	0.16282	0.17485	NULL	NULL	NULL	0.00072	0.25025
1	SW620	BEZ-235	0.00019	0.87167	0.95911	0.97275	1.05583	0.9169	1.05119	0.98619	0.98104
1	SW620	BEZ-235	0.00055	0.9052	0.98702	1.02508	0.91231	1.04742	1.14362	1.0024	1.00333
1	SW620	BEZ-235	0.0017	0.93993	1.00475	0.87224	0.98721	1.14221	1.07587	0.9984	0.99778
1	SW620	BEZ-235	0.005	0.94401	0.83453	0.97489	0.96063	0.967	1.12148	0.98532	0.97985
1	SW620	BEZ-235	0.015	0.98292	1.04697	0.74092	0.76081	0.92557	0.88196	0.9597	0.94566
1	SW620	BEZ-235	0.045	0.4822	0.51723	0.47262	0.40181	0.86883	0.87687	0.7237	0.68179
1	SW620	BEZ-235	0.14	0.79146	0.57628	0.23233	0.25942	0.45459	0.53958	0.7216	0.67981
1	SW620	BEZ-235	0.4	0.17982	0.16608	0.16599	0.13914	0.15768	0.15852	0.27569	0.36637
1	SW837	BEZ-235	0.00019	0.86586	1.05771	0.98233	0.97782	1.10079	0.93546	0.98693	0.98204
1	SW837	BEZ-235	0.00055	1.27699	1.13433	1.25478	1.05543	1.10456	0.83108	1.07324	1.10687
1	SW837	BEZ-235	0.0017	0.93874	1.18682	0.78766	1.02533	0.84943	0.98233	0.97386	0.96441
1	SW837	BEZ-235	0.005	1.01733	0.76477	1.23074	0.39382	1.22452	0.92928	0.98243	0.97594
1	SW837	BEZ-235	0.015	0.95051	1.30081	0.87076	0.90577	0.76968	0.76109	0.9231	0.89888
1	SW837	BEZ-235	0.045	0.56365	0.61605	0.78204	0.70654	1.02573	0.7598	0.79854	0.75633
1	SW837	BEZ-235	0.14	0.69759	1.00018	0.3602	0.22283	0.57541	0.65613	0.68527	0.64642
1	SW837	BEZ-235	0.4	0.28127	0.32126	0.20204	0.28048	0.20426	0.15183	0.08004	0.27934
1	T47D	BEZ-235	0.00019	1.45609	0.96354	1.40807	0.82495	1.31858	1.26593	1.32419	1.56741
1	T47D	BEZ-235	0.00055	1.03837	0.66911	1.49322	0.81285	1.24365	1.26501	1.1668	1.26015
1	T47D	BEZ-235	0.0017	1.10153	0.6962	0.93383	1.02597	0.79853	0.8053	0.82329	0.78273
1	T47D	BEZ-235	0.005	0.63984	0.66859	1.10891	1.13532	1.55177	0.65317	0.85087	0.81323
1	T47D	BEZ-235	0.015	1.09146	0.79961	0.53518	0.84389	1.98839	0.97757	0.88176	0.84881
1	T47D	BEZ-235	0.045	0.42637	0.41511	0.35915	0.3875	0.76159	0.52208	-0.09468	0.21925
1	T47D	BEZ-235	0.14	0.44214	0.59488	0.38314	0.36229	0.28998	0.21334	-0.24792	0.17729
1	T47D	BEZ-235	0.4	0.33329	0.28938	0.1949	0.30734	0.3573	0.22726	-0.52929	0.12003
1	UACC62	BEZ-235	0.00019	0.91301	0.80308	1.00082	1.0632	1.17096	1.09513	1.02125	1.0299
1	UACC62	BEZ-235	0.00055	0.87473	0.88551	1.02184	1.0369	1.18999	1.00553	1.00916	1.01278
1	UACC62	BEZ-235	0.0017	0.90052	0.87095	0.95918	1.00434	1.13938	1.07106	0.98759	0.98294
1	UACC62	BEZ-235	0.005	0.81058	0.74362	1.13724	0.98381	0.97685	1.06531	0.9866	0.9816
1	UACC62	BEZ-235	0.015	0.8891	0.85873	0.96497	0.90686	0.87564	0.84652	0.91561	0.88959
1	UACC62	BEZ-235	0.045	0.52398	0.57335	0.49036	0.44235	0.82058	0.8584	0.59522	0.57056
1	UACC62	BEZ-235	0.14	0.58114	0.5774	0.32249	0.25917	0.42759	0.43806	0.43532	0.45712
1	UACC62	BEZ-235	0.4	0.21659	0.21009	0.2142	0.19996	0.20013	0.18879	-0.06826	0.22743
1	UWB1289	BEZ-235	0.00019	0.9897	1.01963	0.89231	1.02932	0.92119	1.01148	1.00049	1.00068
1	UWB1289	BEZ-235	0.00055	1.04806	1.05754	0.83224	1.10095	0.89194	1.04578	1.03845	1.05475
1	UWB1289	BEZ-235	0.0017	1.07901	1.07452	0.7801	0.9645	0.87042	1.00447	0.98689	0.98199
1	UWB1289	BEZ-235	0.005	1.00042	0.89331	0.79203	0.98526	0.73655	0.92335	0.91937	0.89424
1	UWB1289	BEZ-235	0.015	0.95048	0.93836	0.77484	0.55457	1.07869	0.94601	0.95006	0.93311
1	UWB1289	BEZ-235	0.045	0.41802	0.3638	0.3708	0.36318	0.87496	0.88426	0.21983	0.33907
1	UWB1289	BEZ-235	0.14	0.61346	0.63285	0.3607	0.35725	0.43422	0.46863	0.33304	0.39669
1	UWB1289	BEZ-235	0.4	0.27741	0.27673	0.27812	0.2624	0.27838	0.28009	-0.0742	0.22556
1	UWB1289BRCA1	BEZ-235	0.00019	0.98639	1.00673	1.05302	1.10992	1.08147	1.08669	1.04205	1.06003
1	UWB1289BRCA1	BEZ-235	0.00055	1.00377	0.96626	1.02804	1.03303	1.04476	0.98624	1.0102	1.01424
1	UWB1289BRCA1	BEZ-235	0.0017	1.01819	0.95513	1.06503	1.05299	1.03379	1.07502	1.02744	1.03877
1	UWB1289BRCA1	BEZ-235	0.005	0.82232	0.93752	0.94381	0.97604	0.89452	1.03781	0.96048	0.94669
1	UWB1289BRCA1	BEZ-235	0.015	0.96805	0.94273	0.6156	0.68571	0.96877	0.97853	0.97052	0.95996
1	UWB1289BRCA1	BEZ-235	0.045	0.45225	0.42949	0.39904	0.34535	0.84372	0.80791	0.47087	0.48021
1	UWB1289BRCA1	BEZ-235	0.14	0.70422	0.73563	0.26079	0.29808	0.47728	0.49392	0.5333	0.52362
1	UWB1289BRCA1	BEZ-235	0.4	0.20781	0.23809	0.23019	0.21423	0.23046	0.24433	0.05139	0.26846
1	VCAP	BEZ-235	0.00019	1.12236	0.97503	1.05288	0.91792	1.29444	1.03837	1.04086	1.05828
1	VCAP	BEZ-235	0.00055	1.06055	1.18948	1.15007	1.06676	1.04757	1.06835	1.05986	1.08652
1	VCAP	BEZ-235	0.0017	1.14384	1.02942	1.04758	1.00614	1.14335	0.94174	1.0346	1.04913
1	VCAP	BEZ-235	0.005	0.92527	0.9551	1.09376	1.00607	1.1259	0.97058	0.98925	0.98521
1	VCAP	BEZ-235	0.015	0.94075	1.14291	1.03429	0.86559	0.91482	0.97054	0.95845	0.94403
1	VCAP	BEZ-235	0.045	0.73963	0.65859	0.69739	0.57234	0.97765	0.91309	0.69725	0.65724
1	VCAP	BEZ-235	0.14	0.63744	0.77905	0.52771	0.42824	0.76343	0.66281	0.60564	0.57886
1	VCAP	BEZ-235	0.4	0.39905	0.45262	0.44275	0.41542	0.42665	0.40943	0.20776	0.33344
1	ZR751	BEZ-235	0.00019	0.70525	0.9446	1.01492	0.76271	0.98731	0.92246	0.91682	0.89109
1	ZR751	BEZ-235	0.00055	0.85013	1.04334	0.84607	0.77093	1.03037	0.7935	0.80075	0.75865
1	ZR751	BEZ-235	0.0017	0.95055	0.93077	0.83833	0.76833	0.84033	0.79473	0.78818	0.74554
1	ZR751	BEZ-235	0.005	0.86566	0.62273	0.81233	0.72239	0.74129	0.92975	0.69457	0.65481
1	ZR751	BEZ-235	0.015	0.84853	0.77143	0.59055	0.57982	0.70084	0.73429	0.59864	0.57327
1	ZR751	BEZ-235	0.045	0.29047	0.28263	0.34888	0.58852	0.63319	0.75207	0.08357	0.28071
1	ZR751	BEZ-235	0.14	0.38909	0.38756	0.20821	0.15721	0.35335	0.34426	-0.27372	0.17106
1	ZR751	BEZ-235	0.4	0.21591	0.1796	0.14068	0.266	0.19625	0.17498	-1.02171	0.06065
1	A2058	Bortezomib	1.9e-05	0.95752	1.10763	1.02679	1.13736	1.03768	1.13558	1.03561	1.0506
1	A2058	Bortezomib	5.5e-05	0.99988	1.06774	1.063	1.18467	1.05867	1.12765	1.03214	1.04556
1	A2058	Bortezomib	0.00017	0.91404	1.04292	0.92379	1.09034	0.97926	1.13793	1.0056	1.00779
1	A2058	Bortezomib	0.0005	0.98173	1.06267	1.07313	1.21584	1.02409	1.08094	1.03335	1.04732
1	A2058	Bortezomib	0.0015	1.09466	1.23765	1.07204	1.1645	0.87524	1.07979	1.04246	1.06063
1	A2058	Bortezomib	0.0045	0.89842	0.98856	1.02143	0.94618	0.8322	0.83906	0.95894	0.94467
1	A2058	Bortezomib	0.014	0.00388	0.00996	0.01301	0.0083	0.00331	0.00492	-1.54794	0.02924
1	A2058	Bortezomib	0.04	0.00285	0.00385	0.00416	0.00215	0.0036	0.00188	-1.91146	0.01767
1	A2780	Bortezomib	1.9e-05	0.95484	0.96226	1.07261	0.99017	1.11225	1.04604	1.00697	1.00971
1	A2780	Bortezomib	5.5e-05	1.06383	1.05508	1.05192	1.11179	1.01352	1.04198	1.02024	1.02846
1	A2780	Bortezomib	0.00017	0.92406	0.93616	1.02674	1.00632	1.04434	1.0891	1.00637	1.00887
1	A2780	Bortezomib	0.0005	0.96279	0.91803	1.08004	1.06623	0.9986	0.9934	0.99844	0.99784
1	A2780	Bortezomib	0.0015	0.90546	0.83017	1.04663	0.95166	0.92462	0.82406	0.96552	0.95332
1	A2780	Bortezomib	0.0045	0.09247	0.07622	0.1321	0.08906	0.10476	0.08861	0.06818	0.27478
1	A2780	Bortezomib	0.014	0.00302	0.00325	0.00153	0.00179	0.00127	0.00122	-1.48569	0.03188
1	A2780	Bortezomib	0.04	0.00118	0.00132	0.0018	0.00245	0.00133	0.00115	-1.57176	0.02829
1	A375	Bortezomib	1.9e-05	0.87993	0.78253	0.95781	1.06339	1.04815	1.05486	1.00142	1.00197
1	A375	Bortezomib	5.5e-05	1.04419	0.9978	1.04246	1.04355	0.96963	0.94144	1.00952	1.01328
1	A375	Bortezomib	0.00017	0.85087	0.75108	0.99615	1.0677	1.12935	1.12127	1.01501	1.02103
1	A375	Bortezomib	0.0005	1.06481	0.91863	1.10961	1.0197	0.96238	0.94774	0.9957	0.99406
1	A375	Bortezomib	0.0015	1.06749	1.07752	1.05128	1.11414	0.95116	0.86452	1.02757	1.03896
1	A375	Bortezomib	0.0045	0.97007	0.93798	1.08038	1.05991	1.02316	1.01277	1.00851	1.01187
1	A375	Bortezomib	0.014	0.00772	0.0148	0.00455	0.00432	0.00382	0.00157	-1.5885	0.02764
1	A375	Bortezomib	0.04	0.00157	0.00133	0.00281	0.0026	0.00188	0.00199	-1.98414	0.01597
1	A427	Bortezomib	1.9e-05	0.86306	0.91364	1.19596	NULL	NULL	NULL	0.95114	0.93451
1	A427	Bortezomib	5.5e-05	1.02002	0.94648	0.92477	NULL	NULL	NULL	0.97024	0.95958
1	A427	Bortezomib	0.00017	0.999	0.69062	1.02171	NULL	NULL	NULL	0.99946	0.99925
1	A427	Bortezomib	0.0005	0.87736	1.06587	1.09837	NULL	NULL	NULL	1.03451	1.049
1	A427	Bortezomib	0.0015	0.8972	1.10617	0.85671	NULL	NULL	NULL	0.94132	0.92187
1	A427	Bortezomib	0.0045	0.43501	0.58796	0.68396	NULL	NULL	NULL	0.7127	0.67147
1	A427	Bortezomib	0.014	0.00199	0.00124	0.00129	NULL	NULL	NULL	-2.59901	0.00681
1	A427	Bortezomib	0.04	0.00071	0.00156	0.00091	NULL	NULL	NULL	-2.78778	0.00524
1	CAOV3	Bortezomib	1.9e-05	1.06456	0.78085	1.11586	0.88553	1.03121	0.92726	0.97266	0.96281
1	CAOV3	Bortezomib	5.5e-05	1.09074	1.11997	1.18842	1.19531	1.17049	1.01803	1.17665	1.27748
1	CAOV3	Bortezomib	0.00017	1.04184	0.90656	1.10655	1.02966	0.97222	1.07504	1.04576	1.06549
1	CAOV3	Bortezomib	0.0005	1.01341	1.21588	1.15396	1.23023	1.14994	1.02348	1.18427	1.29105
1	CAOV3	Bortezomib	0.0015	1.01703	1.22557	1.02595	0.92533	1.07911	0.91217	1.0277	1.03915
1	CAOV3	Bortezomib	0.0045	0.08927	0.06359	0.17304	0.07414	0.04895	0.08953	-2.26266	0.01086
1	CAOV3	Bortezomib	0.014	0.00228	0.00242	0.00245	0.0019	0.00188	0.00161	-7.03829	1e-05
1	CAOV3	Bortezomib	0.04	0.00151	0.00197	0.00257	0.00215	0.00167	0.00154	-7.21849	1e-05
1	COLO320DM	Bortezomib	1.9e-05	1.00729	1.11761	1.02549	1.03764	0.91899	1.04218	1.01121	1.01566
1	COLO320DM	Bortezomib	5.5e-05	0.91935	0.9595	0.82856	0.99599	0.92569	1.01362	0.97867	0.97086
1	COLO320DM	Bortezomib	0.00017	0.94071	1.08861	1.035	1.03064	1.02857	1.28342	1.01165	1.01628
1	COLO320DM	Bortezomib	0.0005	0.91458	0.89797	0.87299	0.99711	1.03283	1.06786	0.9837	0.97766
1	COLO320DM	Bortezomib	0.0015	1.07247	0.99807	1.0738	0.9577	0.80318	0.90511	0.99193	0.98887
1	COLO320DM	Bortezomib	0.0045	1.12091	1.08515	1.29142	1.12233	0.99541	0.96695	1.03538	1.05027
1	COLO320DM	Bortezomib	0.014	0.14316	0.11724	0.12274	0.14065	0.0724	0.06842	0.23495	0.34625
1	COLO320DM	Bortezomib	0.04	0.04954	0.0727	0.05394	0.07371	0.06109	0.05657	-0.02222	0.24242
1	DLD1	Bortezomib	1.9e-05	0.98615	0.94364	1.09444	1.0087	1.03388	1.06947	1.00812	1.01132
1	DLD1	Bortezomib	5.5e-05	1.03465	1.00836	1.07616	1.06154	1.03234	1.0075	1.01271	1.01778
1	DLD1	Bortezomib	0.00017	0.95039	0.89392	1.01608	1.04753	0.99342	1.01606	1.00182	1.00253
1	DLD1	Bortezomib	0.0005	0.97831	1.11511	0.8653	1.00465	1.00589	1.00821	1.00203	1.00282
1	DLD1	Bortezomib	0.0015	1.01229	1.02845	1.05136	1.0964	0.84539	0.88163	1.00778	1.01084
1	DLD1	Bortezomib	0.0045	0.66139	0.82596	0.72386	0.59699	0.16455	0.45306	0.82133	0.7806
1	DLD1	Bortezomib	0.014	0.01298	0.01309	0.01234	0.00874	0.00796	0.01372	-0.68494	0.09673
1	DLD1	Bortezomib	0.04	0.00684	0.00672	0.01075	0.00837	0.00572	0.00761	-0.90097	0.0717
1	EFM192B	Bortezomib	1.9e-05	0.91466	1.08077	1.03476	1.15609	0.93204	1.02452	1.02651	1.03743
1	EFM192B	Bortezomib	5.5e-05	0.96285	1.06827	1.18498	1.07584	0.91393	0.96417	1.0146	1.02045
1	EFM192B	Bortezomib	0.00017	0.87394	0.96503	1.09006	1.00948	0.88751	1.08518	0.98836	0.98399
1	EFM192B	Bortezomib	0.0005	0.91091	0.80361	0.98675	1.07029	1.0941	1.20861	1.02552	1.03601
1	EFM192B	Bortezomib	0.0015	1.07943	1.0397	1.03699	0.98434	0.86067	0.77418	1.00963	1.01344
1	EFM192B	Bortezomib	0.0045	0.72195	0.83639	0.90586	0.79404	0.72148	0.76277	0.77267	0.72968
1	EFM192B	Bortezomib	0.014	0.27851	0.33157	0.25392	0.23927	0.19423	0.16104	-0.27049	0.17183
1	EFM192B	Bortezomib	0.04	0.11891	0.1226	0.16577	0.17811	0.14853	0.15763	-0.7032	0.09431
1	ES2	Bortezomib	1.9e-05	0.98509	0.88417	1.03299	1.12784	1.08458	1.12495	1.02797	1.03954
1	ES2	Bortezomib	5.5e-05	1.10323	1.10917	0.84317	0.92873	0.82001	0.91855	0.96111	0.94751
1	ES2	Bortezomib	0.00017	0.86826	0.77695	1.07504	1.13448	1.03722	1.02872	1.01588	1.02226
1	ES2	Bortezomib	0.0005	1.05738	1.22436	1.00985	0.86558	0.83645	0.89207	0.97538	0.96645
1	ES2	Bortezomib	0.0015	1.0822	1.03203	1.11939	1.17856	0.74708	0.73427	1.02719	1.03841
1	ES2	Bortezomib	0.0045	0.97923	1.04158	1.03477	1.04785	0.88981	0.93405	1.00341	1.00474
1	ES2	Bortezomib	0.014	0.30547	0.26589	0.29168	0.20248	0.15996	0.13009	0.28934	0.37337
1	ES2	Bortezomib	0.04	0.00736	0.01028	0.00948	0.01118	0.00785	0.00987	-1.27094	0.04293
1	HCT116	Bortezomib	1.9e-05	0.8955	0.85315	1.00324	0.9902	1.01056	0.97672	0.99177	0.98866
1	HCT116	Bortezomib	5.5e-05	1.03868	0.99141	1.03431	1.01672	1.05965	0.95954	1.01244	1.0174
1	HCT116	Bortezomib	0.00017	0.91486	0.92412	1.08761	0.9986	1.08042	0.918	0.98055	0.9734
1	HCT116	Bortezomib	0.0005	0.99544	0.98966	1.11053	0.97607	1.01463	0.92893	0.99631	0.9949
1	HCT116	Bortezomib	0.0015	1.00229	1.03185	0.96678	0.99294	0.88476	0.82728	0.98996	0.98618
1	HCT116	Bortezomib	0.0045	0.55742	0.72938	0.86387	0.62309	0.71453	0.62777	0.80315	0.76117
1	HCT116	Bortezomib	0.014	0.00542	0.00536	0.00255	0.00653	0.00202	0.00212	-1.73183	0.02266
1	HCT116	Bortezomib	0.04	0.00123	0.00285	0.00247	0.00307	0.00286	0.00234	-1.92701	0.01729
1	HT144	Bortezomib	1.9e-05	0.95555	0.88453	1.06864	1.02417	0.99039	1.05763	1.00531	1.00739
1	HT144	Bortezomib	5.5e-05	1.06761	1.09921	1.06145	1.09138	0.96733	0.92082	1.04578	1.06552
1	HT144	Bortezomib	0.00017	0.96353	0.91	1.08456	1.06275	0.9634	1.10354	1.00956	1.01334
1	HT144	Bortezomib	0.0005	1.00485	0.99455	0.96409	0.98397	0.87664	0.94239	0.98074	0.97365
1	HT144	Bortezomib	0.0015	1.05146	1.05596	1.02146	1.03789	0.94857	0.96082	1.0214	1.03011
1	HT144	Bortezomib	0.0045	0.70879	0.73	0.67222	0.68535	0.62241	0.62746	0.71637	0.6749
1	HT144	Bortezomib	0.014	0.10598	0.06775	0.09138	0.04958	0.05417	0.05261	-1.0479	0.05848
1	HT144	Bortezomib	0.04	0.03063	0.0139	0.01666	0.01403	0.03843	0.01978	-1.93198	0.01717
1	HT29	Bortezomib	1.9e-05	0.99898	1.02163	0.91038	1.0716	0.86018	1.05557	1.00448	1.00623
1	HT29	Bortezomib	5.5e-05	1.13024	1.05018	0.74857	1.0137	0.89884	1.09343	1.01375	1.01924
1	HT29	Bortezomib	0.00017	0.96204	0.9855	1.01266	1.07074	0.91189	1.0134	0.9996	0.99945
1	HT29	Bortezomib	0.0005	1.05252	1.13124	0.96605	1.09876	0.96733	1.11925	1.03188	1.04519
1	HT29	Bortezomib	0.0015	0.91807	0.90286	1.08558	1.16764	0.90314	0.97273	0.97545	0.96654
1	HT29	Bortezomib	0.0045	0.22131	0.36853	0.28427	0.23745	0.27275	0.29597	0.4411	0.4608
1	HT29	Bortezomib	0.014	0.02461	0.01403	0.02194	0.0163	0.01135	0.01252	-0.83128	0.07897
1	HT29	Bortezomib	0.04	0.00949	0.0105	0.00909	0.00777	0.00531	0.00726	-1.08816	0.05531
1	KPL1	Bortezomib	1.9e-05	0.96874	1.02194	1.00879	1.10565	0.94428	1.18943	1.01048	1.01463
1	KPL1	Bortezomib	5.5e-05	1.05193	1.08185	1.0601	1.04909	1.10223	1.1259	1.04713	1.06752
1	KPL1	Bortezomib	0.00017	1.0309	0.91973	0.9721	1.04577	1.11527	1.05291	1.02586	1.0365
1	KPL1	Bortezomib	0.0005	0.97244	1.18415	1.01421	0.96375	1.01422	0.95655	0.99539	0.99363
1	KPL1	Bortezomib	0.0015	1.18384	1.1307	0.95055	1.12001	0.8729	0.86673	1.02384	1.0336
1	KPL1	Bortezomib	0.0045	0.8937	0.83993	1.04651	0.83978	0.93829	0.94808	0.93968	0.91978
1	KPL1	Bortezomib	0.014	0.41525	0.44328	0.42436	0.37755	0.38174	0.34319	0.36752	0.41611
1	KPL1	Bortezomib	0.04	0.33344	0.38759	0.44507	0.39974	0.42764	0.32961	0.35912	0.41129
1	LNCAP	Bortezomib	1.9e-05	0.93577	1.10495	1.07392	1.06403	1.22932	0.96712	1.04087	1.05829
1	LNCAP	Bortezomib	5.5e-05	1.26522	0.99442	0.76332	1.00545	0.79499	1.19427	0.99996	0.99994
1	LNCAP	Bortezomib	0.00017	1.55722	1.13915	1.1183	1.12598	1.51195	0.71259	1.07628	1.11154
1	LNCAP	Bortezomib	0.0005	1.12793	1.22286	1.07234	1.31909	0.7502	0.60848	1.05848	1.08445
1	LNCAP	Bortezomib	0.0015	1.21166	0.81049	1.1235	1.05679	0.81034	0.6615	0.95792	0.94333
1	LNCAP	Bortezomib	0.0045	1.17569	0.55662	0.68116	0.36425	0.34246	0.66255	0.69669	0.65673
1	LNCAP	Bortezomib	0.014	0.06814	0.19726	0.02833	0.02022	0.02152	0.02918	-1.17488	0.04904
1	LNCAP	Bortezomib	0.04	0.01222	0.00482	0.01269	0.00697	0.00971	0.00475	-1.93326	0.01714
1	LOVO	Bortezomib	1.9e-05	0.86422	0.76512	0.97583	1.13831	0.89161	1.01794	0.96699	0.95527
1	LOVO	Bortezomib	5.5e-05	0.94918	1.27702	0.96547	1.13171	0.8161	0.95589	0.98069	0.97359
1	LOVO	Bortezomib	0.00017	0.69412	1.10404	0.87738	1.01487	0.9357	1.12049	0.98795	0.98343
1	LOVO	Bortezomib	0.0005	0.99983	0.9158	0.92945	1.1109	0.63136	0.87501	0.96124	0.94769
1	LOVO	Bortezomib	0.0015	1.27512	0.94071	0.81559	1.18623	0.85534	1.00102	0.98577	0.98047
1	LOVO	Bortezomib	0.0045	0.74471	0.87566	0.61387	0.85157	0.76704	0.60449	0.86529	0.82965
1	LOVO	Bortezomib	0.014	0.01974	0.02665	0.02183	0.02157	0.01771	0.01713	-0.8673	0.07512
1	LOVO	Bortezomib	0.04	0.00454	0.0038	0.00878	0.00769	0.003	0.00666	-1.49563	0.03144
1	MDAMB436	Bortezomib	1.9e-05	0.94583	1.10344	1.02168	1.03296	1.05237	0.98526	1.01509	1.02114
1	MDAMB436	Bortezomib	5.5e-05	1.13819	1.01034	1.04514	1.06854	1.05348	1.26733	1.03315	1.04703
1	MDAMB436	Bortezomib	0.00017	1.15859	1.02801	0.94412	0.97884	0.9759	1.08762	1.00191	1.00265
1	MDAMB436	Bortezomib	0.0005	1.05428	1.14795	0.96246	1.02842	0.97516	1.0534	1.02244	1.0316
1	MDAMB436	Bortezomib	0.0015	0.94414	0.97696	1.05736	1.01917	0.87539	0.8552	0.97747	0.96925
1	MDAMB436	Bortezomib	0.0045	0.40004	0.59759	0.36771	0.44905	0.44919	0.35648	0.52043	0.51436
1	MDAMB436	Bortezomib	0.014	0.04163	0.03085	0.03471	0.03287	0.02572	0.03333	-0.90777	0.07102
1	MDAMB436	Bortezomib	0.04	0.01993	0.02872	0.02912	0.02457	0.0226	0.02367	-1.08493	0.05556
1	MSTO	Bortezomib	1.9e-05	0.56822	1.26275	0.8556	1.31455	0.94188	1.11565	1.01192	1.01666
1	MSTO	Bortezomib	5.5e-05	0.99858	1.0159	1.01524	0.85554	1.08923	1.17495	1.00649	1.00904
1	MSTO	Bortezomib	0.00017	1.08205	1.05947	0.99136	0.49288	0.97188	1.2991	1.01055	1.01473
1	MSTO	Bortezomib	0.0005	0.90541	0.7431	1.00482	1.3221	0.85362	1.16818	0.9807	0.9736
1	MSTO	Bortezomib	0.0015	0.86425	1.14231	1.1085	1.27701	0.75995	0.70358	0.99423	0.99203
1	MSTO	Bortezomib	0.0045	0.99087	1.08113	0.94917	1.02535	1.00359	1.12315	1.00604	1.00841
1	MSTO	Bortezomib	0.014	0.00204	0.00242	0.00251	0.00229	0.0012	0.00117	-1.58018	0.02796
1	MSTO	Bortezomib	0.04	0.00108	0.00142	0.00217	0.00234	0.00162	0.00145	-1.72515	0.02287
1	NCIH1650	Bortezomib	1.9e-05	0.92062	1.04471	1.05178	0.97967	0.91452	1.01317	0.99723	0.99617
1	NCIH1650	Bortezomib	5.5e-05	1.04171	1.09956	0.9593	1.04184	1.06006	1.00874	1.03161	1.0448
1	NCIH1650	Bortezomib	0.00017	0.95611	0.94556	1.02561	1.0439	0.9694	0.99904	0.98771	0.98311
1	NCIH1650	Bortezomib	0.0005	1.06538	1.10979	0.86054	1.04137	1.0405	1.03998	1.03099	1.0439
1	NCIH1650	Bortezomib	0.0015	0.73735	0.50347	0.77588	0.65084	0.54266	0.4531	0.60117	0.57528
1	NCIH1650	Bortezomib	0.0045	0.05769	0.06332	0.10058	0.06945	0.07532	0.06674	-1.07567	0.05628
1	NCIH1650	Bortezomib	0.014	0.08657	0.07893	0.06164	0.04115	0.04794	0.04033	-1.24367	0.04458
1	NCIH1650	Bortezomib	0.04	0.02431	0.03714	0.02338	0.03026	0.02557	0.02446	-1.84953	0.01925
1	NCIH2122	Bortezomib	1.9e-05	1.05463	0.934	1.086	1.14021	1.06739	0.94933	1.02675	1.03778
1	NCIH2122	Bortezomib	5.5e-05	1.13469	1.08555	0.9875	0.9784	1.01194	0.98148	0.99987	0.99982
1	NCIH2122	Bortezomib	0.00017	1.027	0.97525	1.0098	0.95439	0.97727	1.04805	0.99707	0.99595
1	NCIH2122	Bortezomib	0.0005	1.13068	0.97219	1.09641	0.97301	0.97077	0.96269	0.98745	0.98275
1	NCIH2122	Bortezomib	0.0015	1.05182	1.05117	1.01862	0.99051	0.91072	0.90849	1.00206	1.00286
1	NCIH2122	Bortezomib	0.0045	1.10165	1.05628	1.00971	1.00055	0.82362	0.90122	1.00231	1.00321
1	NCIH2122	Bortezomib	0.014	0.16627	0.1267	0.15869	0.16353	0.08339	0.09533	0.12044	0.29543
1	NCIH2122	Bortezomib	0.04	0.03236	0.03787	0.04389	0.04792	0.02895	0.04073	-0.46205	0.13175
1	NCIH23	Bortezomib	1.9e-05	0.98511	1.02526	1.17248	1.09494	1.08006	1.04405	1.02822	1.0399
1	NCIH23	Bortezomib	5.5e-05	0.84856	1.02946	1.09691	1.00968	0.93608	0.97036	0.9953	0.99351
1	NCIH23	Bortezomib	0.00017	1.01761	0.91054	0.94709	0.97333	1.08787	1.0732	0.99787	0.99705
1	NCIH23	Bortezomib	0.0005	1.02664	0.97292	1.00449	0.9244	1.00032	0.8745	0.99369	0.99129
1	NCIH23	Bortezomib	0.0015	0.92579	0.89682	1.00461	1.09998	1.05637	0.88405	0.9834	0.97725
1	NCIH23	Bortezomib	0.0045	0.30912	0.56044	0.54038	0.50342	0.40533	0.36467	0.63026	0.59896
1	NCIH23	Bortezomib	0.014	0.04063	0.04879	0.04287	0.04127	0.04617	0.0443	-0.46847	0.13058
1	NCIH23	Bortezomib	0.04	0.01682	0.01037	0.02024	0.01295	0.01588	0.01463	-0.96043	0.06602
1	NCIH460	Bortezomib	1.9e-05	0.86247	0.90543	1.04952	0.9416	1.04939	1.01956	0.98707	0.98223
1	NCIH460	Bortezomib	5.5e-05	0.98027	1.00022	0.86132	0.86493	1.03327	0.94517	0.97494	0.96586
1	NCIH460	Bortezomib	0.00017	0.89116	0.86533	1.04351	0.96364	0.99346	0.96325	0.97544	0.96653
1	NCIH460	Bortezomib	0.0005	1.01382	1.01113	0.9863	0.94106	0.96402	0.94702	0.98341	0.97726
1	NCIH460	Bortezomib	0.0015	1.02451	1.07319	1.03562	1.02067	0.99265	0.88421	1.01473	1.02063
1	NCIH460	Bortezomib	0.0045	0.96641	0.87929	0.9855	1.04324	0.96892	0.98219	0.98368	0.97763
1	NCIH460	Bortezomib	0.014	0.34587	0.29378	0.28411	0.24222	0.20875	0.19448	0.11963	0.2951
1	NCIH460	Bortezomib	0.04	0.01025	0.00984	0.0208	0.01083	0.01728	0.01219	-1.94426	0.01688
1	NCIH520	Bortezomib	1.9e-05	0.77089	0.98517	0.26044	1.05335	0.91506	0.95103	0.97262	0.96275
1	NCIH520	Bortezomib	5.5e-05	1.18775	0.98646	1.20865	0.95673	1.07347	1.08161	1.0295	1.04174
1	NCIH520	Bortezomib	0.00017	0.86599	1.06687	0.72643	0.93168	1.17282	0.99719	0.9857	0.98037
1	NCIH520	Bortezomib	0.0005	0.95187	0.99712	0.91712	1.1073	0.93747	0.86519	0.97752	0.96932
1	NCIH520	Bortezomib	0.0015	0.80311	1.09486	1.0763	1.00953	1.14056	0.83522	1.0166	1.02328
1	NCIH520	Bortezomib	0.0045	0.18901	0.25727	0.29969	0.16266	0.17414	0.17437	0.32631	0.39301
1	NCIH520	Bortezomib	0.014	0.02621	0.02002	0.02553	0.03146	0.02673	0.01674	-0.44366	0.13515
1	NCIH520	Bortezomib	0.04	0.0283	0.03411	0.03015	0.03026	0.04832	0.03178	-0.37195	0.14928
1	OCUBM	Bortezomib	1.9e-05	1.06907	1.08365	0.95525	1.22874	0.94065	0.94535	1.01363	1.01907
1	OCUBM	Bortezomib	5.5e-05	0.81344	1.07907	1.00407	1.04679	1.10182	0.94599	1.02832	1.04004
1	OCUBM	Bortezomib	0.00017	1.035	1.04241	0.97416	0.9908	0.8851	1.01896	1.00549	1.00764
1	OCUBM	Bortezomib	0.0005	0.8998	0.99148	1.12049	1.03491	0.95851	0.94496	0.97145	0.96119
1	OCUBM	Bortezomib	0.0015	0.98476	1.05391	1.14213	1.09469	0.73593	0.78906	1.02159	1.03038
1	OCUBM	Bortezomib	0.0045	0.18522	0.29747	0.37156	0.25312	0.20169	0.24357	-0.57079	0.11332
1	OCUBM	Bortezomib	0.014	0.01206	0.01616	0.01881	0.0194	0.00654	0.00866	-3.80485	0.00128
1	OCUBM	Bortezomib	0.04	0.0015	0.00174	0.00254	0.00264	0.00194	0.00181	-6.0778	5e-05
1	OV90	Bortezomib	1.9e-05	0.98463	1.00232	1.06397	1.01793	1.09694	1.01114	1.01142	1.01596
1	OV90	Bortezomib	5.5e-05	1.00719	1.02049	1.0195	0.96774	0.87751	0.93435	0.99002	0.98626
1	OV90	Bortezomib	0.00017	1.00631	0.97538	1.02863	1.08059	1.01994	1.02495	1.01757	1.02466
1	OV90	Bortezomib	0.0005	1.06807	0.98171	0.98956	0.77372	1.07546	0.94149	0.98855	0.98425
1	OV90	Bortezomib	0.0015	1.04478	1.05249	1.11216	0.99879	0.87772	0.93941	1.01706	1.02393
1	OV90	Bortezomib	0.0045	0.22228	0.34147	0.26814	0.2325	0.13586	0.17195	-0.17223	0.1969
1	OV90	Bortezomib	0.014	0.01292	0.01502	0.01707	0.01765	0.01096	0.00912	-2.38021	0.00922
1	OV90	Bortezomib	0.04	0.01897	0.00715	0.01773	0.01658	0.01463	0.01321	-2.29287	0.01041
1	OVCAR3	Bortezomib	1.9e-05	1.03082	0.97738	1.10494	1.03219	1.03666	1.06695	1.03328	1.04722
1	OVCAR3	Bortezomib	5.5e-05	1.04506	1.00027	0.89696	1.11014	0.94988	0.9888	0.99462	0.99257
1	OVCAR3	Bortezomib	0.00017	0.76134	0.94983	0.85794	0.97159	0.93189	1.06258	0.94007	0.92028
1	OVCAR3	Bortezomib	0.0005	1.23107	1.05143	1.0551	1.11845	0.90027	1.09964	1.07326	1.1069
1	OVCAR3	Bortezomib	0.0015	0.97085	0.90364	1.11711	0.9861	0.85786	0.81647	0.93629	0.91547
1	OVCAR3	Bortezomib	0.0045	0.27294	0.3737	0.2931	0.23969	0.29467	0.2378	-0.24086	0.17903
1	OVCAR3	Bortezomib	0.014	0.0063	0.00825	0.00582	0.0055	0.00425	0.00694	-4.01957	0.00095
1	OVCAR3	Bortezomib	0.04	0.0047	0.00354	0.00529	0.00547	0.0088	0.00499	-4.18144	0.00076
1	PA1	Bortezomib	1.9e-05	0.83222	0.90151	1.11308	1.03828	1.17334	1.16299	1.03398	1.04823
1	PA1	Bortezomib	5.5e-05	1.0629	0.98979	0.87911	1.32487	1.03272	0.99188	1.00569	1.00792
1	PA1	Bortezomib	0.00017	0.8819	0.94789	1.13825	1.12203	1.14144	1.14654	1.05698	1.08219
1	PA1	Bortezomib	0.0005	1.01786	1.0153	1.02912	0.96755	0.92764	0.96278	0.99599	0.99446
1	PA1	Bortezomib	0.0015	1.07468	1.07376	1.01899	1.06514	0.78352	0.86736	1.01919	1.02696
1	PA1	Bortezomib	0.0045	0.00455	0.00565	0.00299	0.0055	0.01151	0.00548	-1.42414	0.03472
1	PA1	Bortezomib	0.014	0.00201	0.00232	0.00191	0.00188	0.00125	0.00109	-1.9208	0.01744
1	PA1	Bortezomib	0.04	0.00121	0.00167	0.00222	0.00215	0.0012	0.00125	-2.04102	0.01476
1	RKO	Bortezomib	1.9e-05	0.85425	0.86243	1.15392	1.13407	1.13765	1.03404	1.03718	1.05289
1	RKO	Bortezomib	5.5e-05	0.95587	0.94315	1.10063	1.01036	1.10621	1.04128	1.01174	1.01641
1	RKO	Bortezomib	0.00017	0.86811	0.82998	1.03126	0.99962	1.18068	1.03049	1.00688	1.00958
1	RKO	Bortezomib	0.0005	1.05612	0.9322	1.07435	1.04334	1.13657	1.0553	1.02498	1.03524
1	RKO	Bortezomib	0.0015	1.03194	1.04456	1.02765	0.99351	0.74165	0.77173	1.00485	1.00675
1	RKO	Bortezomib	0.0045	0.96437	0.91126	1.00524	0.93443	0.88171	0.82806	0.96301	0.95001
1	RKO	Bortezomib	0.014	0.02216	0.01478	0.02642	0.01541	0.01502	0.00518	-0.9285	0.06901
1	RKO	Bortezomib	0.04	0.00512	0.002	0.00457	0.00483	0.00245	0.00299	-1.56993	0.02836
1	RPMI7951	Bortezomib	1.9e-05	1.00798	1.06703	1.01812	1.07459	1.09692	0.99221	1.04065	1.05797
1	RPMI7951	Bortezomib	5.5e-05	0.9763	1.08717	1.0443	1.10714	1.08603	1.04257	1.06154	1.08906
1	RPMI7951	Bortezomib	0.00017	1.01337	1.00062	1.03247	0.98508	0.99654	1.03277	1.00679	1.00946
1	RPMI7951	Bortezomib	0.0005	1.03608	1.16688	1.09335	1.04094	1.01846	1.03836	1.03791	1.05396
1	RPMI7951	Bortezomib	0.0015	1.07804	1.00718	0.97458	1.02572	0.90728	0.95205	0.99107	0.9877
1	RPMI7951	Bortezomib	0.0045	0.32154	0.30952	0.37924	0.35509	0.25336	0.39877	-0.05652	0.23116
1	RPMI7951	Bortezomib	0.014	0.00562	0.00383	0.00579	0.00469	0.00626	0.00216	-4.13631	0.00081
1	RPMI7951	Bortezomib	0.04	0.00299	0.00218	0.00805	0.00265	0.00165	0.00167	-4.87659	0.00029
1	SKMEL30	Bortezomib	1.9e-05	1.15855	0.98204	1.03333	1.20299	1.09001	1.0775	1.03868	1.05509
1	SKMEL30	Bortezomib	5.5e-05	1.20592	1.15765	0.96892	1.19646	0.92578	1.10344	1.05901	1.08524
1	SKMEL30	Bortezomib	0.00017	1.02616	0.93027	0.87342	0.99949	0.85256	1.16755	0.98281	0.97645
1	SKMEL30	Bortezomib	0.0005	1.20241	0.98676	0.94019	1.08916	1.29528	0.97328	1.01792	1.02515
1	SKMEL30	Bortezomib	0.0015	1.1189	1.00551	1.17911	0.98982	0.86902	0.7776	0.99887	0.99843
1	SKMEL30	Bortezomib	0.0045	0.29654	0.23222	0.22824	0.31991	0.24376	0.21406	0.30963	0.38402
1	SKMEL30	Bortezomib	0.014	0.00429	0.003	0.00702	0.00323	0.0019	0.00182	-1.77484	0.02135
1	SKMEL30	Bortezomib	0.04	0.00233	0.0027	0.00382	0.00378	0.00283	0.00313	-1.79692	0.02071
1	SKMES1	Bortezomib	1.9e-05	0.92006	0.97684	0.94605	1.18389	1.00658	0.93998	0.97906	0.97139
1	SKMES1	Bortezomib	5.5e-05	0.92449	0.96811	1.0967	1.00829	0.97593	1.02977	0.99578	0.99417
1	SKMES1	Bortezomib	0.00017	0.87107	0.90218	0.98731	1.10875	0.97388	1.11734	0.98957	0.98564
1	SKMES1	Bortezomib	0.0005	0.82928	1.02312	0.9224	1.08842	1.00768	1.0073	1.00397	1.00552
1	SKMES1	Bortezomib	0.0015	0.83983	1.03077	1.07749	1.00853	0.72409	0.82361	0.95801	0.94345
1	SKMES1	Bortezomib	0.0045	0.19534	0.24676	0.21556	0.25184	0.20101	0.15963	0.1645	0.31404
1	SKMES1	Bortezomib	0.014	0.01667	0.01672	0.01331	0.01671	0.01425	0.01422	-1.22053	0.04604
1	SKMES1	Bortezomib	0.04	0.00486	0.00381	0.00702	0.00692	0.00512	0.59855	-1.72283	0.02295
1	SKOV3	Bortezomib	1.9e-05	0.95899	1.02667	0.96113	NULL	NULL	NULL	0.97728	0.96899
1	SKOV3	Bortezomib	5.5e-05	1.00947	1.09943	1.06452	NULL	NULL	NULL	1.03583	1.05093
1	SKOV3	Bortezomib	0.00017	0.98914	0.83087	1.06395	NULL	NULL	NULL	0.99374	0.99136
1	SKOV3	Bortezomib	0.0005	0.86831	1.02622	1.05997	NULL	NULL	NULL	1.01483	1.02077
1	SKOV3	Bortezomib	0.0015	0.99106	0.99585	0.95002	NULL	NULL	NULL	0.99485	0.99289
1	SKOV3	Bortezomib	0.0045	0.72435	0.66121	0.79573	NULL	NULL	NULL	0.81521	0.77401
1	SKOV3	Bortezomib	0.014	0.18771	0.29604	0.18559	NULL	NULL	NULL	0.04139	0.26476
1	SKOV3	Bortezomib	0.04	0.00993	0.02774	0.01812	NULL	NULL	NULL	-1.29831	0.04133
1	SW620	Bortezomib	1.9e-05	0.87713	0.97346	1.22368	1.08761	1.04228	1.03586	1.01526	1.02138
1	SW620	Bortezomib	5.5e-05	1.01753	1.09691	0.96056	0.9758	1.04467	1.03797	1.0109	1.01523
1	SW620	Bortezomib	0.00017	0.86996	0.96631	1.05216	1.10211	1.03727	1.03068	1.01331	1.01862
1	SW620	Bortezomib	0.0005	0.98817	0.93046	0.97229	0.95636	0.97275	1.06396	0.9889	0.98473
1	SW620	Bortezomib	0.0015	0.9362	0.9165	0.99638	1.07462	0.90067	0.90862	0.96953	0.95864
1	SW620	Bortezomib	0.0045	0.6293	0.73582	0.69922	0.73471	0.56274	0.59044	0.83707	0.79782
1	SW620	Bortezomib	0.014	0.0036	0.00373	0.00303	0.00516	0.00199	0.00284	-1.27335	0.04279
1	SW620	Bortezomib	0.04	0.00244	0.00205	0.00267	0.00268	0.00239	0.00202	-1.39929	0.03593
1	SW837	Bortezomib	1.9e-05	0.91626	1.16312	0.91743	1.10532	0.96998	0.8627	0.96239	0.9492
1	SW837	Bortezomib	5.5e-05	0.83981	0.58035	0.83871	1.0238	0.87913	0.90351	0.9017	0.8726
1	SW837	Bortezomib	0.00017	0.93713	1.06754	0.999	0.90448	1.33906	0.97712	0.9922	0.98925
1	SW837	Bortezomib	0.0005	0.80208	1.55254	0.98381	1.12765	0.97821	0.94323	0.98756	0.9829
1	SW837	Bortezomib	0.0015	1.15401	1.23114	1.22382	1.05341	0.75522	1.02363	1.06405	1.09285
1	SW837	Bortezomib	0.0045	0.75111	0.4362	0.86329	0.57913	0.45292	0.38704	0.57056	0.55138
1	SW837	Bortezomib	0.014	0.50591	0.34873	0.21716	0.78308	0.18735	0.44942	0.40373	0.43753
1	SW837	Bortezomib	0.04	0.16997	0.15564	0.81159	0.27717	0.11697	0.35088	0.02763	0.25976
1	T47D	Bortezomib	1.9e-05	1.33452	0.80966	0.84116	0.92384	0.91563	0.91702	0.8895	0.85797
1	T47D	Bortezomib	5.5e-05	0.90783	0.58825	1.16342	0.97674	1.01275	1.38137	0.99334	0.99081
1	T47D	Bortezomib	0.00017	0.86727	1.3633	0.75733	1.14882	0.92797	0.9091	0.89256	0.86162
1	T47D	Bortezomib	0.0005	0.93029	0.65464	1.12586	0.94271	1.21719	1.11836	1.03803	1.05414
1	T47D	Bortezomib	0.0015	1.02094	0.81409	1.00989	1.5146	0.80014	0.78903	0.88351	0.85088
1	T47D	Bortezomib	0.0045	0.55911	0.79088	0.80724	0.45138	0.66387	0.83828	0.59752	0.57238
1	T47D	Bortezomib	0.014	0.31325	0.10256	0.12861	0.14759	0.18506	0.17944	-1.28969	0.04183
1	T47D	Bortezomib	0.04	0.00544	0.0166	0.02589	0.00584	0.01747	0.00258	-4.67744	0.00038
1	UACC62	Bortezomib	1.9e-05	1.06135	0.88466	1.08207	1.06292	1.14204	1.0243	1.04065	1.05797
1	UACC62	Bortezomib	5.5e-05	1.06398	1.02872	1.10185	1.1146	0.92588	0.97636	1.03055	1.04326
1	UACC62	Bortezomib	0.00017	0.85716	0.83211	1.05103	1.0676	1.10665	1.14097	1.03886	1.05535
1	UACC62	Bortezomib	0.0005	1.02084	0.96938	1.02023	1.06207	0.94184	0.99842	1.00626	1.00872
1	UACC62	Bortezomib	0.0015	1.0287	1.09231	1.10291	1.05366	0.79254	0.77338	1.02721	1.03844
1	UACC62	Bortezomib	0.0045	0.42036	0.46899	0.53319	0.4546	0.4614	0.41496	0.47344	0.48192
1	UACC62	Bortezomib	0.014	0.11587	0.11525	0.15943	0.10737	0.08875	0.14761	-0.45515	0.13302
1	UACC62	Bortezomib	0.04	0.047	0.04925	0.05939	0.0546	0.05348	0.06653	-0.96768	0.06536
1	UWB1289	Bortezomib	1.9e-05	0.93308	0.911	0.98455	0.96151	1.01066	0.96709	0.96952	0.95863
1	UWB1289	Bortezomib	5.5e-05	1.01745	1.06654	0.98529	0.9204	1.04	0.97044	1.00115	1.0016
1	UWB1289	Bortezomib	0.00017	0.92469	1.03904	0.91791	0.91815	0.98156	0.98105	0.95952	0.94543
1	UWB1289	Bortezomib	0.0005	1.11319	1.11334	0.93159	0.97104	0.89386	1.02467	0.9982	0.99751
1	UWB1289	Bortezomib	0.0015	0.71123	0.99812	1.01881	1.038	0.95038	1.01816	1.0068	1.00947
1	UWB1289	Bortezomib	0.0045	0.37688	0.5196	0.14139	0.46487	0.4245	0.34403	0.23308	0.34536
1	UWB1289	Bortezomib	0.014	0.02095	0.03329	0.04773	0.04338	0.03066	0.03769	-1.79954	0.02063
1	UWB1289	Bortezomib	0.04	0.02911	0.02554	0.01014	0.03031	0.01978	0.01053	-2.17577	0.01225
1	UWB1289BRCA1	Bortezomib	1.9e-05	0.95113	1.01925	1.00422	1.05908	0.75242	0.95892	0.98798	0.98347
1	UWB1289BRCA1	Bortezomib	5.5e-05	1.05255	1.07992	0.90265	0.98523	0.80462	1.05808	1.01209	1.0169
1	UWB1289BRCA1	Bortezomib	0.00017	1.01242	0.97539	0.96904	1.06446	0.82548	1.01103	0.9956	0.99392
1	UWB1289BRCA1	Bortezomib	0.0005	1.19467	1.10447	0.99398	0.97419	0.76962	0.9977	0.99731	0.99628
1	UWB1289BRCA1	Bortezomib	0.0015	1.02303	1.00479	1.09289	1.03133	0.96522	1.00117	1.00892	1.01244
1	UWB1289BRCA1	Bortezomib	0.0045	0.3993	0.55194	0.57435	0.62035	0.51437	0.54743	0.61338	0.5851
1	UWB1289BRCA1	Bortezomib	0.014	0.07755	0.06808	0.05256	0.04679	0.03302	0.04222	-0.93971	0.06795
1	UWB1289BRCA1	Bortezomib	0.04	0.02973	0.04392	0.0231	0.03939	0.02996	0.02752	-1.2687	0.04306
1	VCAP	Bortezomib	1.9e-05	1.21564	1.03372	1.10363	1.05309	0.99415	1.04177	1.04244	1.0606
1	VCAP	Bortezomib	5.5e-05	1.17004	1.00057	0.98798	0.9732	0.88737	1.0073	0.99475	0.99275
1	VCAP	Bortezomib	0.00017	0.99617	1.07315	0.98574	1.04532	1.02954	1.0367	1.02984	1.04223
1	VCAP	Bortezomib	0.0005	1.11099	1.0441	0.93629	1.05231	1.01367	0.97118	1.02607	1.0368
1	VCAP	Bortezomib	0.0015	0.97881	0.85215	0.98154	1.01551	0.80255	0.77487	0.91913	0.89395
1	VCAP	Bortezomib	0.0045	0.37524	0.41244	0.5286	0.5287	0.36458	0.34058	0.14662	0.30635
1	VCAP	Bortezomib	0.014	0.03196	0.0239	0.02791	0.02398	0.02624	0.02871	-2.30554	0.01023
1	VCAP	Bortezomib	0.04	0.0486	0.05241	0.05784	0.0463	0.04427	0.03719	-1.79153	0.02086
1	ZR751	Bortezomib	1.9e-05	1.10781	0.94779	0.8338	1.12729	0.95815	0.98812	0.96706	0.95536
1	ZR751	Bortezomib	5.5e-05	1.13102	0.89888	0.81935	0.96247	0.88361	0.97503	0.91311	0.88652
1	ZR751	Bortezomib	0.00017	0.93635	0.98056	1.06918	0.73581	0.9596	1.14538	0.96326	0.95034
1	ZR751	Bortezomib	0.0005	0.80855	0.92316	0.86917	0.78086	0.82031	1.12915	0.79595	0.75362
1	ZR751	Bortezomib	0.0015	0.83449	0.90381	0.9624	1.09525	0.90124	0.95884	0.91395	0.88755
1	ZR751	Bortezomib	0.0045	0.87396	1.17438	0.97522	1.04342	1.22243	0.72475	1.01122	1.01568
1	ZR751	Bortezomib	0.014	0.51327	0.62017	0.47676	0.52751	0.34696	0.3156	0.14964	0.30763
1	ZR751	Bortezomib	0.04	0.41629	0.37265	0.35417	0.44847	0.38453	0.39244	-0.14345	0.20492
1	A2058	Carboplatin	0.022	0.9882	1.11197	0.96174	0.09413	0.99366	1.09326	0.99537	0.9936
1	A2058	Carboplatin	0.065	0.95791	1.10767	1.02345	1.23414	0.91865	1.08579	1.027	1.03814
1	A2058	Carboplatin	0.2	0.9351	1.14331	0.99357	0.08206	1.00424	1.17822	0.99945	0.99924
1	A2058	Carboplatin	0.6	0.98066	1.13775	0.96597	1.19138	1.03259	1.06706	1.02469	1.03482
1	A2058	Carboplatin	1.9	1.05139	1.01419	1.04168	1.19804	0.9829	1.10613	1.02309	1.03253
1	A2058	Carboplatin	5.5	1.00913	1.0473	0.92153	1.01256	0.97401	1.12274	1.00548	1.00763
1	A2058	Carboplatin	17	0.70321	0.67832	0.68603	0.81462	0.69302	0.62716	0.81128	0.7698
1	A2058	Carboplatin	50	0.25026	0.2273	0.188	0.229	0.23897	0.1878	0.24983	0.35347
1	A2780	Carboplatin	0.022	0.94339	0.92225	1.01146	0.94399	1.014	0.93431	0.97749	0.96928
1	A2780	Carboplatin	0.065	0.99542	1.06503	1.0077	1.02119	0.9485	0.94664	1.00061	1.00085
1	A2780	Carboplatin	0.2	0.97915	1.06642	0.92909	0.85293	0.96056	0.9914	0.98811	0.98365
1	A2780	Carboplatin	0.6	0.96256	0.96384	0.91785	1.02795	0.95794	0.91849	0.98425	0.9784
1	A2780	Carboplatin	1.9	0.90853	0.90916	1.08236	0.90854	0.88622	0.87846	0.96275	0.94967
1	A2780	Carboplatin	5.5	0.8417	0.75841	0.83136	0.78764	0.82966	0.64919	0.91752	0.89195
1	A2780	Carboplatin	17	0.3997	0.47391	0.4387	0.45383	0.40144	0.43285	0.67744	0.63944
1	A2780	Carboplatin	50	0.26369	0.21099	0.26762	0.23881	0.21148	0.21588	0.42476	0.45048
1	A375	Carboplatin	0.022	1.05887	1.00037	1.09314	1.03844	0.95776	0.98435	1.00919	1.01282
1	A375	Carboplatin	0.065	1.10141	1.07709	1.20977	1.16281	0.98448	0.94389	1.04085	1.05826
1	A375	Carboplatin	0.2	1.06218	1.03841	1.00357	1.0331	0.97352	1.0094	1.01005	1.01403
1	A375	Carboplatin	0.6	1.12459	1.05655	1.12557	1.09771	0.94697	0.97611	1.0355	1.05044
1	A375	Carboplatin	1.9	1.10601	1.00296	0.96877	1.00158	1.11438	1.12723	1.02535	1.03577
1	A375	Carboplatin	5.5	1.03134	0.97593	1.01455	0.92326	1.16063	1.15967	1.01084	1.01514
1	A375	Carboplatin	17	0.97757	0.91221	0.87344	0.90127	1.00414	0.95582	0.96738	0.95579
1	A375	Carboplatin	50	0.62385	0.5714	0.64847	0.65511	0.63676	0.6044	0.77946	0.73658
1	A427	Carboplatin	0.022	0.91668	0.94096	0.98685	NULL	NULL	NULL	0.96708	0.95539
1	A427	Carboplatin	0.065	1.0583	1.02341	0.9586	NULL	NULL	NULL	1.01252	1.01751
1	A427	Carboplatin	0.2	0.85883	0.53125	1.09544	NULL	NULL	NULL	0.91768	0.89215
1	A427	Carboplatin	0.6	1.16992	1.13037	0.81526	NULL	NULL	NULL	1.06629	1.09625
1	A427	Carboplatin	1.9	1.00549	0.95498	1.01397	NULL	NULL	NULL	1.00296	1.00411
1	A427	Carboplatin	5.5	0.65202	0.91615	1.14059	NULL	NULL	NULL	0.95263	0.93644
1	A427	Carboplatin	17	0.67164	1.00728	0.93333	NULL	NULL	NULL	0.96268	0.94958
1	A427	Carboplatin	50	0.70317	0.70187	0.68321	NULL	NULL	NULL	0.8085	0.76684
1	CAOV3	Carboplatin	0.022	1.11628	1.09468	0.96144	1.07918	1.15686	1.02566	1.10859	1.16246
1	CAOV3	Carboplatin	0.065	1.24747	0.95117	1.08464	0.99963	1.05212	1.05528	1.06814	1.09907
1	CAOV3	Carboplatin	0.2	1.05304	0.90896	1.04094	1.16567	1.02919	1.00976	1.0449	1.06422
1	CAOV3	Carboplatin	0.6	1.04375	0.93462	0.9393	1.21142	1.04657	0.93127	0.98891	0.98474
1	CAOV3	Carboplatin	1.9	1.13724	1.14109	1.24911	1.09907	0.94311	0.90389	1.14549	1.22347
1	CAOV3	Carboplatin	5.5	0.92224	0.81259	1.16933	1.09255	0.81201	0.68503	0.8147	0.77346
1	CAOV3	Carboplatin	17	0.57274	0.70158	0.76506	0.64955	0.81454	0.41971	0.48909	0.49249
1	CAOV3	Carboplatin	50	0.18793	0.22874	0.34418	0.16894	0.23473	0.1769	-1.04342	0.05885
1	COLO320DM	Carboplatin	0.022	1.01067	0.91282	1.05449	0.91104	1.11329	0.91224	0.98592	0.98067
1	COLO320DM	Carboplatin	0.065	1.17523	0.99886	0.85073	1.1264	1.06494	0.86807	1.01133	1.01583
1	COLO320DM	Carboplatin	0.2	1.1387	1.12906	1.04537	0.92382	0.97815	1.10562	1.02626	1.03707
1	COLO320DM	Carboplatin	0.6	1.05227	0.92337	1.18291	1.07218	0.90086	0.82125	0.99558	0.99389
1	COLO320DM	Carboplatin	1.9	1.18415	1.06551	1.24736	1.23987	0.93576	0.85052	1.04244	1.0606
1	COLO320DM	Carboplatin	5.5	1.19563	1.05632	0.84676	0.85764	0.93627	0.89872	0.96893	0.95784
1	COLO320DM	Carboplatin	17	1.49864	1.05246	0.97482	1.00431	1.02282	0.93608	1.00486	1.00676
1	COLO320DM	Carboplatin	50	0.7633	0.83055	0.63688	0.71605	0.70336	0.65683	0.87627	0.84238
1	DLD1	Carboplatin	0.022	1.03349	1.02294	0.86806	1.06729	1.09106	0.99201	1.01073	1.01499
1	DLD1	Carboplatin	0.065	1.08879	0.99697	1.10307	1.14845	1.02297	1.03962	1.024	1.03383
1	DLD1	Carboplatin	0.2	0.99594	1.0472	1.04081	1.01817	1.04164	1.04035	1.01534	1.02149
1	DLD1	Carboplatin	0.6	1.00684	1.07089	1.12385	1.04559	1.01754	1.03438	1.01512	1.02118
1	DLD1	Carboplatin	1.9	1.04904	1.05755	1.0609	1.02365	1.13016	1.01054	1.02003	1.02816
1	DLD1	Carboplatin	5.5	1.0217	1.05717	0.97496	1.0498	1.08221	0.99379	1.01355	1.01896
1	DLD1	Carboplatin	17	1.0955	0.90878	0.89444	0.88749	1.00514	0.95419	0.97263	0.96277
1	DLD1	Carboplatin	50	0.84553	0.91094	0.73763	0.62392	0.70978	0.50521	0.8753	0.84125
1	EFM192B	Carboplatin	0.022	1.09065	0.9288	0.8826	1.06071	0.89622	0.82973	0.91691	0.8912
1	EFM192B	Carboplatin	0.065	0.91853	1.00963	1.17903	1.20969	1.04348	1.06991	1.05004	1.07183
1	EFM192B	Carboplatin	0.2	0.76146	1.07234	1.01585	1.15735	1.01875	1.022	1.0183	1.02569
1	EFM192B	Carboplatin	0.6	1.00019	1.00975	1.09586	1.09368	0.98733	0.98372	1.0045	1.00626
1	EFM192B	Carboplatin	1.9	0.83181	1.02004	1.07782	1.04628	0.96467	0.94487	0.99304	0.9904
1	EFM192B	Carboplatin	5.5	0.78278	0.89805	0.87946	0.99562	0.90014	0.68492	0.89298	0.86212
1	EFM192B	Carboplatin	17	1.23419	1.19209	0.64164	0.59721	0.56798	0.59784	0.5658	0.54775
1	EFM192B	Carboplatin	50	0.28234	0.24375	0.36996	0.27295	0.23066	0.25703	-0.20522	0.1881
1	ES2	Carboplatin	0.022	1.01086	0.98298	1.02207	1.00506	1.06502	0.98986	1.00388	1.00539
1	ES2	Carboplatin	0.065	1.03074	1.08608	1.08209	1.09958	1.00523	1.01807	1.02687	1.03795
1	ES2	Carboplatin	0.2	1.00383	1.13011	1.07153	1.07405	1.06628	1.10071	1.0344	1.04884
1	ES2	Carboplatin	0.6	1.01057	1.095	0.99561	1.0716	1.00232	0.99806	1.00314	1.00436
1	ES2	Carboplatin	1.9	1.1538	1.03188	0.99642	1.08085	1.09543	1.11405	1.04135	1.059
1	ES2	Carboplatin	5.5	1.06532	0.97358	1.06298	1.06301	1.17564	1.18014	1.03044	1.0431
1	ES2	Carboplatin	17	0.98011	0.99718	0.91377	1.00492	1.06094	1.02502	1.00051	1.00071
1	ES2	Carboplatin	50	0.42962	0.50427	0.38816	0.61115	0.45989	0.56551	0.64279	0.60945
1	HCT116	Carboplatin	0.022	1.0133	0.97675	0.89594	0.95434	0.96672	0.92138	0.98012	0.97282
1	HCT116	Carboplatin	0.065	1.00999	0.97259	1.18541	1.0451	0.94724	0.92153	0.99568	0.99403
1	HCT116	Carboplatin	0.2	0.97139	1.03984	1.00276	0.97072	0.86827	0.90766	0.9855	0.9801
1	HCT116	Carboplatin	0.6	1.12702	1.16703	1.13207	1.04837	0.90518	0.91265	1.0415	1.05922
1	HCT116	Carboplatin	1.9	1.09133	0.95814	1.0329	0.95071	0.93704	1.02398	0.99557	0.99388
1	HCT116	Carboplatin	5.5	1.05955	1.02104	1.0326	0.97347	0.94265	1.01437	1.00866	1.01208
1	HCT116	Carboplatin	17	1.06383	0.95639	1.01502	0.90333	0.93132	1.03161	0.99289	0.99019
1	HCT116	Carboplatin	50	0.9847	0.97187	0.97577	0.99685	0.96418	0.8942	0.9869	0.982
1	HT144	Carboplatin	0.022	1.07544	1.03135	1.09871	0.97599	0.98172	0.92227	1.00476	1.00662
1	HT144	Carboplatin	0.065	1.05122	1.07258	1.05287	1.11613	0.95748	0.91495	1.03714	1.05284
1	HT144	Carboplatin	0.2	1.00154	1.0648	0.95257	0.95955	1.03259	0.96913	0.98918	0.98511
1	HT144	Carboplatin	0.6	1.05468	1.06767	1.06202	1.06414	0.88989	0.92579	1.04151	1.05923
1	HT144	Carboplatin	1.9	1.07184	1.12464	1.02731	1.13231	1.05641	0.9503	1.0455	1.06511
1	HT144	Carboplatin	5.5	1.02535	1.00407	0.97745	0.95925	0.95338	0.90662	0.97646	0.96789
1	HT144	Carboplatin	17	0.92468	0.98462	0.95251	0.91231	0.96422	0.86072	0.95361	0.93771
1	HT144	Carboplatin	50	0.75762	0.84387	0.77739	0.76312	0.77473	0.82197	0.81441	0.77315
1	HT29	Carboplatin	0.022	0.91712	1.01142	0.95121	0.92006	1.00733	1.08487	0.99084	0.98738
1	HT29	Carboplatin	0.065	1.04947	1.02608	1.08851	1.07952	1.07246	1.14973	1.03202	1.04539
1	HT29	Carboplatin	0.2	1.02153	1.06648	0.95712	1.13072	1.0508	1.06422	1.02445	1.03448
1	HT29	Carboplatin	0.6	1.09202	1.013	1.22374	0.96932	1.07224	1.09016	1.03413	1.04845
1	HT29	Carboplatin	1.9	1.08433	1.15011	0.65863	1.19201	0.95465	0.94367	1.00844	1.01177
1	HT29	Carboplatin	5.5	0.99348	1.00167	0.98324	0.99046	0.90331	1.08634	0.99647	0.99512
1	HT29	Carboplatin	17	1.00769	0.98486	0.9006	0.86284	0.86616	0.87869	0.94887	0.93157
1	HT29	Carboplatin	50	0.73907	0.83561	0.46416	0.86676	0.6513	0.76426	0.87519	0.84112
1	KPL1	Carboplatin	0.022	0.99606	1.04129	1.02218	1.05134	1.10415	1.10962	1.03112	1.04409
1	KPL1	Carboplatin	0.065	1.10485	0.98879	1.08547	1.02091	1.07054	0.94743	1.03074	1.04354
1	KPL1	Carboplatin	0.2	1.06668	1.21003	0.96548	0.96991	1.17825	1.18523	1.07942	1.11639
1	KPL1	Carboplatin	0.6	1.11865	0.9774	1.25121	0.95573	0.93932	0.95229	0.97662	0.96811
1	KPL1	Carboplatin	1.9	1.05546	1.0524	1.15312	1.15823	1.0148	1.02951	1.03611	1.05133
1	KPL1	Carboplatin	5.5	1.04571	1.03485	1.1414	0.89473	0.96479	1.09067	1.02715	1.03836
1	KPL1	Carboplatin	17	1.25061	1.20986	1.1055	0.90382	0.98373	0.96588	1.03001	1.04248
1	KPL1	Carboplatin	50	0.93452	0.89438	0.80958	1.00856	0.92403	0.78427	0.93457	0.91329
1	LNCAP	Carboplatin	0.022	1.09083	0.92831	1.33695	1.29001	0.81256	0.87294	1.00584	1.00813
1	LNCAP	Carboplatin	0.065	1.14074	1.04972	1.28943	1.16349	1.35217	1.18398	1.09817	1.14579
1	LNCAP	Carboplatin	0.2	0.80735	1.12727	0.16276	1.40222	0.96581	0.90223	0.95817	0.94366
1	LNCAP	Carboplatin	0.6	0.83599	1.29153	1.1902	0.96254	0.89568	0.95382	0.97382	0.96436
1	LNCAP	Carboplatin	1.9	0.05366	1.09209	0.77813	0.65686	1.1192	0.48632	0.79656	0.75425
1	LNCAP	Carboplatin	5.5	1.03769	1.13563	1.06524	0.6123	1.1719	0.57822	1.03076	1.04356
1	LNCAP	Carboplatin	17	0.77175	1.29263	0.71778	1.00661	0.631	0.65818	0.81941	0.77853
1	LNCAP	Carboplatin	50	0.57727	0.86077	0.39328	0.54126	0.58433	0.48765	0.64388	0.61037
1	LOVO	Carboplatin	0.022	0.9788	1.25205	0.80446	1.15229	0.93397	0.58897	0.97853	0.97067
1	LOVO	Carboplatin	0.065	0.91541	1.13527	1.14461	0.76863	0.97146	1.09444	1.0156	1.02186
1	LOVO	Carboplatin	0.2	1.11444	1.0601	0.85525	1.10776	1.16197	0.8857	1.03879	1.05525
1	LOVO	Carboplatin	0.6	0.95221	1.08259	1.13401	1.10496	0.93805	1.05087	1.03109	1.04404
1	LOVO	Carboplatin	1.9	0.93845	1.10776	0.7941	1.00576	0.91327	0.78722	0.96292	0.9499
1	LOVO	Carboplatin	5.5	0.90363	1.19588	0.70864	1.00418	1.02716	0.86486	0.97728	0.96899
1	LOVO	Carboplatin	17	0.74713	0.94166	0.89958	0.84849	0.85107	0.738	0.92165	0.89707
1	LOVO	Carboplatin	50	0.72775	0.72003	0.34716	0.58621	0.56125	0.41898	0.73258	0.69024
1	MDAMB436	Carboplatin	0.022	1.02523	1.06642	0.99188	0.95882	1.0283	1.10314	1.01479	1.02071
1	MDAMB436	Carboplatin	0.065	1.17285	1.09531	1.03935	0.92275	0.8849	0.97117	1.00294	1.00408
1	MDAMB436	Carboplatin	0.2	1.03069	0.98808	0.9799	0.92233	0.98926	1.03445	0.99362	0.99119
1	MDAMB436	Carboplatin	0.6	0.94744	0.99893	0.91488	0.98041	0.90829	0.90827	0.96008	0.94616
1	MDAMB436	Carboplatin	1.9	0.78655	0.93555	0.83346	0.89143	0.86307	0.82392	0.90788	0.88011
1	MDAMB436	Carboplatin	5.5	0.65152	0.6155	0.63793	0.68859	0.64247	0.64048	0.75148	0.70856
1	MDAMB436	Carboplatin	17	0.44001	0.52364	0.54809	0.3619	0.46504	0.51328	0.59974	0.57414
1	MDAMB436	Carboplatin	50	0.48849	0.40721	0.39584	0.42217	0.40793	0.3855	0.4976	0.49834
1	MSTO	Carboplatin	0.022	1.01297	1.21852	1.01459	1.2116	1.09225	1.11308	1.04109	1.05862
1	MSTO	Carboplatin	0.065	0.97515	1.28092	0.87818	0.97273	0.91675	1.19241	0.9889	0.98473
1	MSTO	Carboplatin	0.2	1.05898	1.06808	0.94018	1.04234	1.12167	1.26189	1.02589	1.03654
1	MSTO	Carboplatin	0.6	1.12476	1.12325	1.03197	1.19326	0.93922	1.05729	1.03633	1.05165
1	MSTO	Carboplatin	1.9	0.88622	0.92034	1.12164	1.32964	1.00769	1.06387	1.01478	1.0207
1	MSTO	Carboplatin	5.5	0.90035	1.05098	0.76492	1.05682	0.95496	0.52281	0.96843	0.95718
1	MSTO	Carboplatin	17	0.75074	0.90962	0.78611	0.93847	0.82977	0.60749	0.91035	0.88313
1	MSTO	Carboplatin	50	0.21142	0.21747	0.20168	0.22086	0.22798	0.16893	0.35272	0.40766
1	NCIH1650	Carboplatin	0.022	1.02428	1.07774	0.97669	0.98054	0.92814	0.87505	0.9833	0.97711
1	NCIH1650	Carboplatin	0.065	0.98379	1.08664	1.04596	1.05534	0.94305	1.01783	1.02425	1.03419
1	NCIH1650	Carboplatin	0.2	1.01055	0.99561	0.9431	0.97326	1.06276	1.03504	1.00238	1.0033
1	NCIH1650	Carboplatin	0.6	1.03936	0.99943	1.06874	1.01973	0.98869	0.99579	1.00737	1.01027
1	NCIH1650	Carboplatin	1.9	0.8805	1.06581	0.97864	1.134	0.99379	0.99213	0.99454	0.99246
1	NCIH1650	Carboplatin	5.5	1.01292	1.06428	0.90289	1.00212	0.9913	0.88607	0.99745	0.99647
1	NCIH1650	Carboplatin	17	0.978	1.09394	0.88232	1.0604	0.99597	0.94281	0.98988	0.98607
1	NCIH1650	Carboplatin	50	0.98294	1.05402	0.97043	0.95918	0.90429	0.88019	0.97232	0.96235
1	NCIH2122	Carboplatin	0.022	1.03439	0.9733	1.14648	0.99721	0.96992	0.94083	0.99329	0.99074
1	NCIH2122	Carboplatin	0.065	1.05431	1.0967	1.09843	1.02447	0.9154	0.90671	1.01745	1.02449
1	NCIH2122	Carboplatin	0.2	1.06726	0.93566	0.99305	1.04215	1.02132	0.98589	1.00324	1.0045
1	NCIH2122	Carboplatin	0.6	1.11296	1.06217	1.0746	1.05395	0.94884	0.92086	1.02549	1.03597
1	NCIH2122	Carboplatin	1.9	1.13286	1.10674	1.05064	1.02018	0.97053	1.00978	1.01572	1.02203
1	NCIH2122	Carboplatin	5.5	1.04716	1.03708	0.96919	0.96364	0.96117	0.97798	0.98791	0.98338
1	NCIH2122	Carboplatin	17	1.17249	1.04976	0.8718	0.88638	0.79632	0.84987	0.94179	0.92247
1	NCIH2122	Carboplatin	50	0.56471	0.67145	0.61494	0.65707	0.62181	0.53844	0.78287	0.74007
1	NCIH23	Carboplatin	0.022	0.96306	0.9698	0.0273	0.86509	0.96481	0.97808	0.98279	0.97642
1	NCIH23	Carboplatin	0.065	0.99755	0.99195	0.97724	0.96994	1.07686	0.90791	0.99273	0.98997
1	NCIH23	Carboplatin	0.2	0.98502	1.13141	0.25543	0.93488	0.92336	1.0004	0.98084	0.97379
1	NCIH23	Carboplatin	0.6	0.94122	1.00922	1.01478	0.98201	1.09873	0.93093	0.99794	0.99715
1	NCIH23	Carboplatin	1.9	0.94901	1.00555	0.99594	1.04126	0.9871	1.02586	1.00035	1.00049
1	NCIH23	Carboplatin	5.5	0.86763	0.95168	1.09497	0.94176	0.91837	0.67045	0.96601	0.95397
1	NCIH23	Carboplatin	17	0.58961	0.62636	0.68652	0.65959	0.58899	0.53432	0.76676	0.72373
1	NCIH23	Carboplatin	50	0.22325	0.26025	0.23964	0.23012	0.21985	0.22235	0.30432	0.38121
1	NCIH460	Carboplatin	0.022	1.00647	1.06426	0.97453	0.97909	0.95627	0.97026	0.98453	0.97878
1	NCIH460	Carboplatin	0.065	1.05661	1.07075	1.04586	1.05893	0.9643	0.93613	1.03295	1.04674
1	NCIH460	Carboplatin	0.2	1.0384	1.04441	0.95558	0.94085	0.92489	1.10054	0.99801	0.99725
1	NCIH460	Carboplatin	0.6	1.02063	1.02231	1.07577	1.05747	0.88168	0.93484	1.01401	1.01961
1	NCIH460	Carboplatin	1.9	0.96633	0.92899	1.00721	0.91319	0.93445	0.94993	0.96073	0.94702
1	NCIH460	Carboplatin	5.5	0.99073	0.96173	0.89919	0.95349	0.89594	0.91305	0.95446	0.93882
1	NCIH460	Carboplatin	17	0.78318	0.78615	0.51625	0.76922	0.63263	0.66583	0.78108	0.73824
1	NCIH460	Carboplatin	50	0.44431	0.50324	0.38697	0.48652	0.40693	0.36072	0.43667	0.45797
1	NCIH520	Carboplatin	0.022	1.19947	1.03821	1.05796	0.98122	1.01416	0.78663	1.01021	1.01425
1	NCIH520	Carboplatin	0.065	1.16394	0.89991	1.1235	1.13169	1.21255	1.00275	1.04743	1.06796
1	NCIH520	Carboplatin	0.2	1.0341	0.92548	0.80381	1.03251	1.17292	0.78891	0.99161	0.98844
1	NCIH520	Carboplatin	0.6	0.99627	0.78885	1.17478	1.07649	0.94858	0.95951	0.99117	0.98783
1	NCIH520	Carboplatin	1.9	0.88124	1.29513	0.90928	1.01469	1.04781	0.98424	0.99979	0.99971
1	NCIH520	Carboplatin	5.5	0.99245	1.1248	1.03518	1.0332	0.93307	0.67951	1.00504	1.00701
1	NCIH520	Carboplatin	17	0.99662	0.91126	0.80711	0.92097	0.96913	0.91873	0.967	0.95528
1	NCIH520	Carboplatin	50	0.70768	0.64076	0.54464	0.58687	0.80624	0.49108	0.80721	0.76547
1	OCUBM	Carboplatin	0.022	1.17676	1.02063	0.99613	0.92875	0.96729	0.92344	0.97918	0.97155
1	OCUBM	Carboplatin	0.065	1.00697	1.00532	1.07277	0.96284	1.0304	1.01399	1.01176	1.01644
1	OCUBM	Carboplatin	0.2	1.16731	1.11057	0.9324	1.04225	1.06522	1.00605	1.05903	1.08527
1	OCUBM	Carboplatin	0.6	1.15133	0.92992	1.00417	0.97473	0.94067	1.04069	0.98804	0.98356
1	OCUBM	Carboplatin	1.9	0.96278	1.12463	1.09637	1.23275	0.91097	0.83068	1.03286	1.04661
1	OCUBM	Carboplatin	5.5	1.12314	1.12191	0.90964	0.94801	0.95474	0.94197	0.94378	0.92502
1	OCUBM	Carboplatin	17	1.17526	1.18352	0.74762	0.97534	0.90738	0.82275	0.93186	0.90986
1	OCUBM	Carboplatin	50	0.49721	0.55391	0.41274	0.53165	0.5153	0.50484	0.24084	0.34909
1	OV90	Carboplatin	0.022	1.04297	0.92121	1.00672	0.93843	0.99823	0.97404	0.98895	0.9848
1	OV90	Carboplatin	0.065	1.00945	1.08821	1.07395	1.07913	0.9312	0.87749	1.03233	1.04584
1	OV90	Carboplatin	0.2	1.00029	1.11338	1.02256	0.92683	0.99834	0.91424	0.99946	0.99925
1	OV90	Carboplatin	0.6	1.01217	1.0998	1.03047	1.0507	0.94463	1.03004	1.02359	1.03324
1	OV90	Carboplatin	1.9	0.93355	1.00271	1.04552	1.08139	0.93529	0.95093	0.98144	0.9746
1	OV90	Carboplatin	5.5	0.98547	0.82171	0.84653	0.97658	0.98373	0.83781	0.92671	0.90339
1	OV90	Carboplatin	17	0.7749	0.87764	0.79185	0.86144	0.80912	0.77533	0.82386	0.78335
1	OV90	Carboplatin	50	0.71999	0.58551	0.64149	0.64102	0.67289	0.68295	0.66776	0.63092
1	OVCAR3	Carboplatin	0.022	1.06356	1.08624	1.14003	1.12189	1.02118	0.83617	1.071	1.10343
1	OVCAR3	Carboplatin	0.065	1.12359	1.05456	1.17096	1.01435	1.09861	1.0185	1.07254	1.10579
1	OVCAR3	Carboplatin	0.2	1.04193	0.99645	1.02506	1.12265	0.99269	0.9531	1.01052	1.01469
1	OVCAR3	Carboplatin	0.6	1.21219	1.03337	1.15457	1.1453	1.10088	1.03329	1.11412	1.17141
1	OVCAR3	Carboplatin	1.9	1.07555	0.96483	1.21702	1.15808	1.08735	0.85272	1.07698	1.11262
1	OVCAR3	Carboplatin	5.5	0.8871	0.98014	0.78442	0.772	0.74625	0.92755	0.82362	0.78308
1	OVCAR3	Carboplatin	17	0.84166	0.97159	0.8565	0.97199	0.79891	0.72934	0.83917	0.80015
1	OVCAR3	Carboplatin	50	0.65323	0.63107	0.55841	0.60597	0.67639	0.52095	0.52771	0.51958
1	PA1	Carboplatin	0.022	1.03169	1.09113	0.96487	1.04697	1.00501	1.01796	1.01142	1.01596
1	PA1	Carboplatin	0.065	1.05234	1.12448	1.14756	1.19897	0.97127	0.97196	1.03946	1.05623
1	PA1	Carboplatin	0.2	0.97487	0.92009	0.94647	1.01785	1.11328	0.95711	0.98388	0.9779
1	PA1	Carboplatin	0.6	1.03029	0.94069	1.09434	1.09898	0.88539	0.91648	0.99319	0.9906
1	PA1	Carboplatin	1.9	0.77259	0.86132	0.63501	0.63499	0.78304	0.71173	0.86112	0.82487
1	PA1	Carboplatin	5.5	0.34648	0.21164	0.24101	0.16799	0.26841	0.14724	0.30801	0.38316
1	PA1	Carboplatin	17	0.06187	0.05478	0.03176	0.03804	0.06224	0.03964	-0.422	0.13927
1	PA1	Carboplatin	50	0.00778	0.00313	0.00473	0.00291	0.00177	0.00478	-1.57984	0.02798
1	RKO	Carboplatin	0.022	1.00851	0.97647	0.99318	0.97988	0.92836	0.89729	0.98984	0.98601
1	RKO	Carboplatin	0.065	1.04793	1.03105	1.14625	1.06199	0.90648	0.88968	1.01784	1.02504
1	RKO	Carboplatin	0.2	1.03551	1.07306	1.00324	0.9649	0.95659	0.93404	0.9926	0.98979
1	RKO	Carboplatin	0.6	1.01348	1.06648	1.15293	1.14034	0.93594	0.90096	1.01806	1.02535
1	RKO	Carboplatin	1.9	1.11417	1.07635	1.12815	1.12408	1.00043	0.95898	1.04192	1.05984
1	RKO	Carboplatin	5.5	1.13309	1.08219	0.95468	0.96086	1.07866	1.11542	1.03564	1.05065
1	RKO	Carboplatin	17	1.19967	1.11568	0.97412	0.99077	0.98989	0.93337	0.99552	0.99381
1	RKO	Carboplatin	50	0.90555	0.90162	0.92438	0.90697	0.83426	0.89238	0.95329	0.9373
1	RPMI7951	Carboplatin	0.022	0.99398	0.90376	0.92269	0.94582	0.97538	1.01714	0.96081	0.94712
1	RPMI7951	Carboplatin	0.065	1.02398	1.04055	1.00463	1.02329	1.03405	1.04429	1.02789	1.03942
1	RPMI7951	Carboplatin	0.2	0.95806	0.99704	0.9115	0.93178	0.97505	1.04332	0.96683	0.95506
1	RPMI7951	Carboplatin	0.6	1.04346	1.05348	0.95286	1.06553	1.06818	0.9647	1.04614	1.06605
1	RPMI7951	Carboplatin	1.9	1.02348	1.10318	1.03418	1.06643	0.96002	1.07849	1.04785	1.06858
1	RPMI7951	Carboplatin	5.5	0.85833	0.85592	0.92827	0.85637	0.91444	0.8012	0.84996	0.81221
1	RPMI7951	Carboplatin	17	0.39376	0.53017	0.49046	0.47487	0.42515	0.36857	0.22159	0.3399
1	RPMI7951	Carboplatin	50	0.12175	0.10237	0.08831	0.11189	0.10198	0.11641	-1.17756	0.04886
1	SKMEL30	Carboplatin	0.022	1.00756	1.089	1.12571	1.10075	1.25666	1.10506	1.04711	1.06749
1	SKMEL30	Carboplatin	0.065	0.97767	0.90756	1.18234	1.12825	1.10406	1.01335	1.02744	1.03877
1	SKMEL30	Carboplatin	0.2	0.96214	1.06074	1.09799	1.11808	1.10577	0.9783	1.03673	1.05224
1	SKMEL30	Carboplatin	0.6	1.2598	1.05422	1.23543	1.10454	1.16416	1.01362	1.06062	1.08767
1	SKMEL30	Carboplatin	1.9	1.16049	1.22141	1.37685	1.24234	1.0729	1.05884	1.08404	1.12356
1	SKMEL30	Carboplatin	5.5	0.90791	1.10105	0.99151	0.83094	1.15619	1.11565	1.02176	1.03063
1	SKMEL30	Carboplatin	17	1.37524	1.34806	0.93225	0.77605	0.7099	0.85845	0.94684	0.92895
1	SKMEL30	Carboplatin	50	0.50563	0.65698	0.54316	0.54478	0.54046	0.54559	0.70719	0.66636
1	SKMES1	Carboplatin	0.022	0.94753	1.00614	0.95979	1.12189	0.92728	0.8893	0.97473	0.96557
1	SKMES1	Carboplatin	0.065	0.91277	0.91373	1.02404	1.02003	0.91866	0.91864	0.95481	0.93928
1	SKMES1	Carboplatin	0.2	0.83018	0.97466	0.83537	0.91466	1.05024	0.90009	0.94824	0.93076
1	SKMES1	Carboplatin	0.6	1.02549	1.00928	0.99695	0.99931	0.94947	1.0113	1.00229	1.00318
1	SKMES1	Carboplatin	1.9	0.95581	0.9871	1.19672	1.22027	0.8135	0.98681	0.99301	0.99036
1	SKMES1	Carboplatin	5.5	1.02765	0.923	0.93454	1.02961	0.82328	0.90799	0.96065	0.94691
1	SKMES1	Carboplatin	17	0.9048	0.9917	0.93045	0.97409	0.90193	0.90242	0.95422	0.93851
1	SKMES1	Carboplatin	50	0.77372	0.77636	0.66294	0.75106	0.68305	0.65915	0.82287	0.78227
1	SKOV3	Carboplatin	0.022	1.04844	1.10589	0.9776	NULL	NULL	NULL	1.02711	1.0383
1	SKOV3	Carboplatin	0.065	1.11342	1.12074	0.89036	NULL	NULL	NULL	1.06157	1.0891
1	SKOV3	Carboplatin	0.2	0.93377	0.95252	0.93472	NULL	NULL	NULL	0.96132	0.94779
1	SKOV3	Carboplatin	0.6	0.88534	1.07503	1.0512	NULL	NULL	NULL	1.02861	1.04046
1	SKOV3	Carboplatin	1.9	1.0748	1.11825	0.98906	NULL	NULL	NULL	1.04134	1.05898
1	SKOV3	Carboplatin	5.5	1.1148	0.99186	0.89341	NULL	NULL	NULL	0.99532	0.99353
1	SKOV3	Carboplatin	17	0.8475	0.96632	1.04163	NULL	NULL	NULL	0.98037	0.97315
1	SKOV3	Carboplatin	50	0.66912	0.43141	0.35956	NULL	NULL	NULL	0.51825	0.51281
1	SW620	Carboplatin	0.022	0.95438	1.02559	1.01189	0.99258	0.98792	0.96257	0.9961	0.99461
1	SW620	Carboplatin	0.065	0.96633	0.98308	1.15166	1.02243	0.98783	1.00511	0.99859	0.99805
1	SW620	Carboplatin	0.2	1.05773	1.02153	0.89807	0.97303	0.9251	0.91916	0.97918	0.97155
1	SW620	Carboplatin	0.6	0.93693	1.04117	1.09089	1.02857	0.90702	0.96144	0.99801	0.99725
1	SW620	Carboplatin	1.9	1.00653	1.03713	0.99461	1.227	0.88731	0.91946	1.00023	1.00032
1	SW620	Carboplatin	5.5	0.96927	1.02529	0.82434	0.78057	1.02021	0.90028	0.97314	0.96345
1	SW620	Carboplatin	17	0.83567	0.79482	0.77043	0.86991	0.85648	0.86625	0.93342	0.91183
1	SW620	Carboplatin	50	0.52886	0.47356	0.4658	0.46937	0.58301	0.39562	0.70053	0.66024
1	SW837	Carboplatin	0.022	0.95629	0.82116	0.93559	1.20695	1.01151	0.80922	0.96393	0.95123
1	SW837	Carboplatin	0.065	0.82315	0.20329	1.0674	1.16862	1.20865	1.12215	1.05877	1.08488
1	SW837	Carboplatin	0.2	0.92824	1.16799	1.2454	1.10801	1.18672	0.83816	1.08391	1.12336
1	SW837	Carboplatin	0.6	1.28381	0.144	1.23407	0.99806	0.84575	1.02456	1.0073	1.01017
1	SW837	Carboplatin	1.9	1.07909	1.03623	1.37311	1.61912	0.96476	0.79562	1.03639	1.05174
1	SW837	Carboplatin	5.5	1.14407	0.85935	0.8735	1.0537	0.85604	0.89202	0.91906	0.89386
1	SW837	Carboplatin	17	0.96108	1.01654	1.27891	1.0231	0.82853	0.84292	0.9927	0.98993
1	SW837	Carboplatin	50	0.81499	0.91815	0.80331	1.29423	0.7474	0.87721	0.89152	0.86038
1	T47D	Carboplatin	0.022	1.18291	1.22906	1.34149	0.83526	0.76527	0.94452	1.07811	1.11436
1	T47D	Carboplatin	0.065	0.88592	0.58612	1.04093	0.82254	0.72396	0.7732	0.71448	0.67313
1	T47D	Carboplatin	0.2	0.94066	1.10789	0.86825	0.65409	0.94431	1.1683	0.92511	0.90139
1	T47D	Carboplatin	0.6	1.02534	1.02909	0.99893	0.74341	0.76639	1.17617	1.01526	1.02138
1	T47D	Carboplatin	1.9	1.23698	0.76831	0.92986	0.97073	1.12518	0.96906	0.96136	0.94784
1	T47D	Carboplatin	5.5	0.68595	1.07683	1.26888	0.60321	0.88188	1.18394	0.97363	0.9641
1	T47D	Carboplatin	17	0.7965	1.0003	0.9255	0.63469	1.46127	0.87174	0.86484	0.82914
1	T47D	Carboplatin	50	0.60802	0.80664	0.8823	0.62517	0.67186	0.66708	0.49262	0.49491
1	UACC62	Carboplatin	0.022	1.13507	0.97671	1.02566	0.9886	1.04505	0.9606	1.00479	1.00666
1	UACC62	Carboplatin	0.065	1.10741	1.06163	1.14523	1.05706	1.02661	0.98928	1.03887	1.05536
1	UACC62	Carboplatin	0.2	1.10121	1.09187	1.00158	1.03085	1.07001	1.10129	1.05248	1.07546
1	UACC62	Carboplatin	0.6	1.10822	1.01112	1.14685	1.01576	0.98778	1.02452	1.01345	1.01882
1	UACC62	Carboplatin	1.9	1.15639	1.0734	1.08901	1.05207	1.15242	1.04732	1.05264	1.0757
1	UACC62	Carboplatin	5.5	1.00818	0.96886	0.94539	1.01238	1.06452	0.96334	0.99221	0.98926
1	UACC62	Carboplatin	17	0.87132	0.84451	0.8417	0.91362	0.94162	0.75085	0.89666	0.86653
1	UACC62	Carboplatin	50	0.54781	0.67246	0.56248	0.55553	0.61673	0.5518	0.60781	0.5806
1	UWB1289	Carboplatin	0.022	1.04377	1.06708	1.01847	0.99452	0.95953	1.04298	1.02538	1.03581
1	UWB1289	Carboplatin	0.065	1.13235	1.01233	1.04579	1.06573	1.01834	1.0089	1.02646	1.03736
1	UWB1289	Carboplatin	0.2	1.09224	1.05308	0.98915	1.03265	1.05915	0.9811	1.0352	1.05001
1	UWB1289	Carboplatin	0.6	1.04222	0.95308	1.01656	0.97799	0.94625	0.93386	0.97058	0.96004
1	UWB1289	Carboplatin	1.9	0.93142	0.93999	0.91521	0.90094	0.89541	0.84817	0.91913	0.89395
1	UWB1289	Carboplatin	5.5	0.81785	0.67616	0.69477	0.70142	0.65968	0.56789	0.6833	0.64466
1	UWB1289	Carboplatin	17	0.52429	0.51655	0.50525	0.46632	0.50449	0.49703	0.42688	0.4518
1	UWB1289	Carboplatin	50	0.22538	0.25618	0.19045	0.21346	0.22467	0.2068	-0.27328	0.17116
1	UWB1289BRCA1	Carboplatin	0.022	1.02298	1.01129	1.03323	1.01983	1.1236	1.06349	1.0179	1.02513
1	UWB1289BRCA1	Carboplatin	0.065	1.0964	1.14851	1.00566	1.12436	1.03552	1.01642	1.04127	1.05888
1	UWB1289BRCA1	Carboplatin	0.2	1.0363	1.04697	1.05367	0.94993	1.05814	1.02377	1.02636	1.03722
1	UWB1289BRCA1	Carboplatin	0.6	1.04027	1.05984	1.00659	1.0555	1.00489	1.01133	1.01646	1.02308
1	UWB1289BRCA1	Carboplatin	1.9	0.95091	1.02578	1.04322	1.05639	0.95008	0.89128	0.99242	0.98955
1	UWB1289BRCA1	Carboplatin	5.5	0.88413	0.92852	0.9257	0.9921	0.88302	0.81562	0.93545	0.9144
1	UWB1289BRCA1	Carboplatin	17	0.75268	0.75698	0.59704	0.77375	0.66732	0.70774	0.79686	0.75457
1	UWB1289BRCA1	Carboplatin	50	0.35852	0.31099	0.26668	0.29446	0.3122	0.21782	0.22801	0.34294
1	VCAP	Carboplatin	0.022	1.06681	1.00378	1.08224	1.1366	1.00081	0.8506	1.03176	1.04501
1	VCAP	Carboplatin	0.065	1.15799	1.15149	1.04243	0.93511	1.0338	0.98899	1.03425	1.04863
1	VCAP	Carboplatin	0.2	1.09814	1.02912	1.09733	1.02012	1.06291	1.00888	1.0412	1.05878
1	VCAP	Carboplatin	0.6	1.09094	0.93844	1.11801	1.08406	0.99157	0.86699	1.034	1.04826
1	VCAP	Carboplatin	1.9	1.08197	1.05063	1.3757	1.17168	1.009	0.92064	1.05879	1.08491
1	VCAP	Carboplatin	5.5	1.01367	1.02703	0.91092	0.95754	1.06723	0.91506	0.98673	0.98177
1	VCAP	Carboplatin	17	1.22689	1.38916	1.14476	1.07046	1.01966	0.93244	1.0936	1.13855
1	VCAP	Carboplatin	50	0.95279	0.94867	0.83232	0.90161	0.90596	0.86254	0.90735	0.87947
1	ZR751	Carboplatin	0.022	1.04066	0.8657	0.86261	0.89082	0.82762	0.8691	0.82796	0.78781
1	ZR751	Carboplatin	0.065	0.95279	0.92825	0.97761	0.94671	1.04868	1.22731	0.95716	0.94234
1	ZR751	Carboplatin	0.2	1.03869	0.90042	0.86337	1.03416	0.88243	1.06946	0.95978	0.94577
1	ZR751	Carboplatin	0.6	0.91876	0.91098	0.94995	0.91896	0.9572	0.90703	0.89766	0.86773
1	ZR751	Carboplatin	1.9	0.28588	0.92907	1.00038	0.99594	1.21965	0.6191	0.95378	0.93794
1	ZR751	Carboplatin	5.5	0.9464	1.09637	0.86226	0.90444	0.88634	0.66661	0.86637	0.8309
1	ZR751	Carboplatin	17	0.7728	0.95612	0.76826	0.98312	0.94128	0.9627	0.93631	0.91549
1	ZR751	Carboplatin	50	0.81989	0.78492	0.92259	0.92605	0.84857	0.86306	0.81171	0.77026
1	A2058	Cyclophosphamide	0.0045	1.06347	1.02325	1.04922	1.14554	1.02714	1.18515	1.02783	1.03933
1	A2058	Cyclophosphamide	0.014	0.96635	1.11099	0.94147	1.0781	0.99727	1.13173	1.01878	1.02638
1	A2058	Cyclophosphamide	0.04	1.04563	0.97392	0.99732	1.02467	1.05518	1.15701	1.01754	1.02461
1	A2058	Cyclophosphamide	0.12	1.02133	1.02358	0.96703	1.03017	1.00795	1.15949	1.01128	1.01576
1	A2058	Cyclophosphamide	0.37	1.0461	1.15925	0.97973	1.1775	1.05928	1.11359	1.04209	1.06009
1	A2058	Cyclophosphamide	1.1	0.87961	0.9901	1.04378	1.08707	1.03551	1.17926	1.01973	1.02773
1	A2058	Cyclophosphamide	3.4	0.98746	1.07643	1.05928	1.16281	1.07057	1.19012	1.036	1.05117
1	A2058	Cyclophosphamide	10	0.95664	0.9918	1.0932	1.28561	0.99681	1.20281	1.02235	1.03147
1	A2780	Cyclophosphamide	0.0045	1.05531	1.0413	0.88009	1.01378	1.05662	0.98655	1.01055	1.01473
1	A2780	Cyclophosphamide	0.014	1.03231	0.93894	1.03991	0.98728	0.96837	0.93263	0.99129	0.988
1	A2780	Cyclophosphamide	0.04	1.03416	0.92233	1.12279	1.01633	1.04528	1.05862	1.01513	1.0212
1	A2780	Cyclophosphamide	0.12	0.99327	0.95262	0.94482	1.01022	1.0403	0.97023	0.99285	0.99014
1	A2780	Cyclophosphamide	0.37	1.02851	1.0241	1.00301	0.92957	0.99188	0.98779	0.999	0.99861
1	A2780	Cyclophosphamide	1.1	1.0169	0.95319	1.02367	0.98272	0.99015	1.00669	0.99939	0.99915
1	A2780	Cyclophosphamide	3.4	1.05898	0.98127	0.99756	0.97292	1.01665	0.9355	0.99587	0.99429
1	A2780	Cyclophosphamide	10	1.03133	1.00638	1.04802	1.00296	1.13901	1.00526	1.00726	1.01012
1	A375	Cyclophosphamide	0.0045	0.88608	0.75027	1.01214	0.95418	0.87466	0.89519	0.94466	0.92615
1	A375	Cyclophosphamide	0.014	0.85321	0.78648	0.90555	0.93871	1.09425	1.07119	0.96126	0.94771
1	A375	Cyclophosphamide	0.04	0.82793	0.74421	0.98227	0.93254	0.94775	0.93675	0.96771	0.95622
1	A375	Cyclophosphamide	0.12	0.86733	0.86201	1.00353	0.94303	0.99545	1.15118	0.98507	0.97952
1	A375	Cyclophosphamide	0.37	1.06196	0.96663	1.04607	1.02486	1.05366	1.03003	1.01784	1.02504
1	A375	Cyclophosphamide	1.1	0.96005	0.96178	1.15983	1.09792	1.07617	1.09241	1.03867	1.05507
1	A375	Cyclophosphamide	3.4	1.06241	0.99993	1.04422	0.88899	1.11478	1.05969	1.0242	1.03412
1	A375	Cyclophosphamide	10	0.91034	0.98431	1.14241	1.08781	1.09421	1.17283	1.04162	1.05939
1	A427	Cyclophosphamide	0.0045	1.0287	1.08072	1.02937	NULL	NULL	NULL	1.01566	1.02195
1	A427	Cyclophosphamide	0.014	1.03153	1.02995	0.89848	NULL	NULL	NULL	1.01596	1.02237
1	A427	Cyclophosphamide	0.04	0.81363	1.01094	1.1702	NULL	NULL	NULL	1.00589	1.0082
1	A427	Cyclophosphamide	0.12	0.75432	0.99601	1.08225	NULL	NULL	NULL	0.99784	0.99701
1	A427	Cyclophosphamide	0.37	1.11732	0.85244	1.0129	NULL	NULL	NULL	1.00693	1.00965
1	A427	Cyclophosphamide	1.1	0.93714	0.96626	1.04024	NULL	NULL	NULL	0.98143	0.97459
1	A427	Cyclophosphamide	3.4	0.95293	0.96774	0.95166	NULL	NULL	NULL	0.97392	0.96449
1	A427	Cyclophosphamide	10	0.89651	1.22919	0.89959	NULL	NULL	NULL	0.94276	0.92372
1	CAOV3	Cyclophosphamide	0.0045	1.13245	1.00348	1.05825	0.92239	1.19597	1.04095	1.06306	1.09135
1	CAOV3	Cyclophosphamide	0.014	1.13475	1.14866	0.89815	1.01367	1.02737	0.7968	1.02646	1.03736
1	CAOV3	Cyclophosphamide	0.04	0.99155	0.97043	0.83443	0.83898	1.00596	0.83204	0.86953	0.83454
1	CAOV3	Cyclophosphamide	0.12	0.87055	0.96222	0.93304	1.13952	0.91767	1.13533	0.92993	0.90743
1	CAOV3	Cyclophosphamide	0.37	1.16254	0.94772	0.88224	1.07039	1.13086	1.23201	1.12489	1.18903
1	CAOV3	Cyclophosphamide	1.1	1.15363	0.9379	1.20118	1.06386	1.08971	1.13127	1.13652	1.20835
1	CAOV3	Cyclophosphamide	3.4	0.85378	1.12321	0.93558	0.8751	1.30841	0.99894	0.95664	0.94166
1	CAOV3	Cyclophosphamide	10	1.15664	0.95325	1.0941	0.89574	1.23126	0.90677	1.03049	1.04317
1	COLO320DM	Cyclophosphamide	0.0045	0.87944	0.86763	1.16794	1.1211	0.99452	0.98649	0.99656	0.99524
1	COLO320DM	Cyclophosphamide	0.014	0.9799	0.87728	1.15735	1.00683	1.16736	0.88306	0.9976	0.99668
1	COLO320DM	Cyclophosphamide	0.04	0.92359	1.02036	1.14663	1.09572	0.84597	0.99754	1.00321	1.00446
1	COLO320DM	Cyclophosphamide	0.12	0.83168	0.98729	0.99737	0.91065	1.09212	1.00034	0.99722	0.99615
1	COLO320DM	Cyclophosphamide	0.37	1.05478	0.97088	1.03841	1.18274	1.04629	0.8935	1.01497	1.02097
1	COLO320DM	Cyclophosphamide	1.1	0.93899	0.97584	1.06282	0.99051	1.15198	1.13792	1.0095	1.01326
1	COLO320DM	Cyclophosphamide	3.4	0.93552	0.95201	1.18385	1.04727	0.97009	0.95039	0.98567	0.98033
1	COLO320DM	Cyclophosphamide	10	0.81873	0.90794	1.19918	1.34785	1.04261	1.14217	1.03188	1.04519
1	DLD1	Cyclophosphamide	0.0045	0.93633	0.91051	1.03537	0.97995	0.81857	1.03048	0.98351	0.9774
1	DLD1	Cyclophosphamide	0.014	0.91992	0.90298	0.94285	0.99591	1.026	0.90869	0.97259	0.96271
1	DLD1	Cyclophosphamide	0.04	0.88929	0.88484	1.05862	1.05156	1.03185	0.96917	1.0002	1.00028
1	DLD1	Cyclophosphamide	0.12	0.88144	0.89437	0.97901	1.04999	1.00742	0.9629	0.98864	0.98438
1	DLD1	Cyclophosphamide	0.37	1.0678	1.05339	1.04002	1.06024	0.95853	0.99774	1.0176	1.0247
1	DLD1	Cyclophosphamide	1.1	1.06232	1.05444	1.11386	1.07543	0.72849	1.11131	1.02568	1.03624
1	DLD1	Cyclophosphamide	3.4	1.11505	0.99274	1.00518	1.03066	0.70951	0.98342	0.9996	0.99945
1	DLD1	Cyclophosphamide	10	0.93696	1.00651	1.11216	1.06679	1.02295	1.08102	1.01693	1.02375
1	EFM192B	Cyclophosphamide	0.0045	0.95121	1.03246	0.97512	0.874	0.91102	1.10141	0.96595	0.95389
1	EFM192B	Cyclophosphamide	0.014	0.88879	0.95517	0.93295	1.05363	0.91316	0.9779	0.94776	0.93014
1	EFM192B	Cyclophosphamide	0.04	0.93901	1.01224	0.96588	1.06703	0.82519	1.04682	0.99002	0.98626
1	EFM192B	Cyclophosphamide	0.12	1.00389	0.99128	1.00948	1.04681	1.02272	1.09145	1.01449	1.02029
1	EFM192B	Cyclophosphamide	0.37	0.98626	1.0344	1.02095	1.0072	0.88703	1.11095	1.01268	1.01773
1	EFM192B	Cyclophosphamide	1.1	0.75451	0.75965	0.94224	1.17414	1.10306	1.09013	1.01457	1.0204
1	EFM192B	Cyclophosphamide	3.4	0.95158	1.06389	0.9915	1.01397	1.08618	1.13593	1.03466	1.04922
1	EFM192B	Cyclophosphamide	10	0.7895	0.81221	1.04044	1.28076	1.0712	1.07942	1.04929	1.07072
1	ES2	Cyclophosphamide	0.0045	0.86904	0.80775	0.93167	1.03317	0.82261	0.76885	0.91802	0.89257
1	ES2	Cyclophosphamide	0.014	1.08981	0.88813	1.08683	1.00051	1.07358	1.03851	1.0267	1.03771
1	ES2	Cyclophosphamide	0.04	0.79099	0.71113	1.02103	0.97447	0.81869	0.78783	0.89371	0.86299
1	ES2	Cyclophosphamide	0.12	1.01574	0.99172	1.00259	1.02694	1.1277	1.08463	1.01034	1.01444
1	ES2	Cyclophosphamide	0.37	1.1338	1.05724	0.91931	0.92005	1.01521	0.96787	0.99584	0.99425
1	ES2	Cyclophosphamide	1.1	0.92196	0.83881	0.97326	1.03659	1.10595	1.07692	1.00241	1.00335
1	ES2	Cyclophosphamide	3.4	1.08171	1.16551	0.90773	1.02077	1.04945	1.10833	1.0311	1.04406
1	ES2	Cyclophosphamide	10	0.96726	0.89864	1.02023	1.05989	1.01124	1.07365	1.00764	1.01065
1	HCT116	Cyclophosphamide	0.0045	0.89579	0.95355	1.08242	0.9693	1.05609	0.88021	0.98058	0.97344
1	HCT116	Cyclophosphamide	0.014	0.9641	0.85869	1.02254	0.89383	0.93681	1.07551	0.97491	0.96582
1	HCT116	Cyclophosphamide	0.04	0.94823	0.87741	1.09678	0.97401	1.06482	0.97963	0.98842	0.98407
1	HCT116	Cyclophosphamide	0.12	0.9234	0.78011	1.02804	0.96024	0.96128	0.99078	0.98024	0.97298
1	HCT116	Cyclophosphamide	0.37	1.02234	0.99682	0.9963	1.11113	0.99114	0.99611	0.9983	0.99765
1	HCT116	Cyclophosphamide	1.1	0.86398	0.86763	1.06272	1.0368	0.94479	0.90012	0.96016	0.94627
1	HCT116	Cyclophosphamide	3.4	1.03499	0.9699	1.0367	1.00859	1.00143	0.92226	1.00247	1.00343
1	HCT116	Cyclophosphamide	10	0.89727	1.06336	1.11798	1.15176	0.95955	0.89761	1.00562	1.00782
1	HT144	Cyclophosphamide	0.0045	1.04982	0.93131	1.01793	1.00623	0.89812	0.9519	0.98451	0.97876
1	HT144	Cyclophosphamide	0.014	0.97306	0.95081	0.97726	1.08877	1.0893	1.03	1.00265	1.00368
1	HT144	Cyclophosphamide	0.04	1.08372	0.9286	1.12303	0.99431	0.97425	0.97428	0.98842	0.98407
1	HT144	Cyclophosphamide	0.12	0.92754	0.92746	0.98724	0.968	1.03731	0.99612	0.98343	0.97729
1	HT144	Cyclophosphamide	0.37	1.06391	1.09458	0.97292	0.9687	1.05179	1.0356	1.0313	1.04435
1	HT144	Cyclophosphamide	1.1	1.01824	0.94804	1.08534	1.1058	1.05405	1.0005	1.02599	1.03669
1	HT144	Cyclophosphamide	3.4	1.04506	1.03313	0.93907	0.94908	1.04777	1.05647	1.02807	1.03968
1	HT144	Cyclophosphamide	10	0.8841	0.89435	1.05128	1.13604	1.04035	1.04182	1.02948	1.04171
1	HT29	Cyclophosphamide	0.0045	0.93525	0.92423	0.92209	1.01271	0.97868	1.07979	0.98077	0.97369
1	HT29	Cyclophosphamide	0.014	1.02678	1.01582	1.05301	1.0701	0.80624	0.97977	1.00922	1.01286
1	HT29	Cyclophosphamide	0.04	0.91715	0.87574	1.0262	1.034	0.97361	0.98292	0.99039	0.98677
1	HT29	Cyclophosphamide	0.12	0.9397	0.9442	1.08605	0.89843	0.95131	0.98206	0.97654	0.968
1	HT29	Cyclophosphamide	0.37	0.98443	1.18928	0.93567	0.92444	1.09373	1.07418	1.01263	1.01766
1	HT29	Cyclophosphamide	1.1	0.98512	0.99848	1.06934	1.05757	1.07909	1.08106	1.0269	1.038
1	HT29	Cyclophosphamide	3.4	1.17604	1.24867	1.00054	1.00951	1.03889	1.12341	1.03411	1.04842
1	HT29	Cyclophosphamide	10	0.98306	1.0306	1.12582	1.07791	1.19617	1.20487	1.04241	1.06056
1	KPL1	Cyclophosphamide	0.0045	0.98043	0.90766	1.1206	1.08225	1.04488	0.99979	1.01519	1.02128
1	KPL1	Cyclophosphamide	0.014	0.88708	0.79655	1.07836	1.12748	0.98341	0.83154	0.95397	0.93818
1	KPL1	Cyclophosphamide	0.04	0.84666	0.89144	1.0485	0.97889	0.98411	1.17839	0.98716	0.98236
1	KPL1	Cyclophosphamide	0.12	0.87026	0.83616	0.96438	0.95665	1.00034	1.04994	0.9723	0.96233
1	KPL1	Cyclophosphamide	0.37	1.03148	0.97293	1.13174	1.116	1.13173	1.08555	1.066	1.09581
1	KPL1	Cyclophosphamide	1.1	1.07292	1.0041	1.20066	1.15535	1.12341	1.1291	1.08173	1.11997
1	KPL1	Cyclophosphamide	3.4	1.13678	1.16131	1.14713	1.06231	1.1229	1.05074	1.08392	1.12338
1	KPL1	Cyclophosphamide	10	1.05053	0.97912	1.23876	1.24699	1.1263	1.08528	1.06913	1.10058
1	LNCAP	Cyclophosphamide	0.0045	0.63249	0.69281	0.79148	1.17615	1.30614	1.1773	0.99	0.98623
1	LNCAP	Cyclophosphamide	0.014	0.94478	0.74336	1.0686	0.68639	0.88855	0.89906	0.9312	0.90903
1	LNCAP	Cyclophosphamide	0.04	0.72646	0.7882	1.14396	0.91825	1.09292	1.17085	1.00342	1.00475
1	LNCAP	Cyclophosphamide	0.12	0.93483	0.44085	0.90481	0.7729	1.0233	1.13823	0.94878	0.93146
1	LNCAP	Cyclophosphamide	0.37	0.03347	0.7258	1.25311	1.03849	1.38087	1.05199	1.02711	1.0383
1	LNCAP	Cyclophosphamide	1.1	0.67961	1.19836	0.88002	0.73552	1.02566	1.12845	0.9704	0.9598
1	LNCAP	Cyclophosphamide	3.4	1.1383	0.98253	1.58905	1.50003	1.46698	1.2435	1.18628	1.29465
1	LNCAP	Cyclophosphamide	10	0.95521	1.19632	1.05107	1.08542	0.84693	0.95703	1.00248	1.00344
1	LOVO	Cyclophosphamide	0.0045	0.88965	0.91561	0.64198	1.27862	0.82911	0.95867	0.95069	0.93393
1	LOVO	Cyclophosphamide	0.014	0.83642	0.90266	0.79526	0.82889	1.0441	1.14043	0.93272	0.91095
1	LOVO	Cyclophosphamide	0.04	0.8003	0.94306	1.04378	0.86398	0.72971	0.78079	0.91156	0.88461
1	LOVO	Cyclophosphamide	0.12	0.92308	1.01801	0.64241	1.01365	0.90876	1.08315	0.98452	0.97877
1	LOVO	Cyclophosphamide	0.37	0.79835	1.00029	0.77398	1.01293	0.95977	1.19695	0.99029	0.98663
1	LOVO	Cyclophosphamide	1.1	1.05284	1.0864	0.9196	0.98569	1.11679	1.02165	1.0176	1.0247
1	LOVO	Cyclophosphamide	3.4	0.99963	1.31	0.88205	0.82245	1.02915	1.00822	1.00189	1.00262
1	LOVO	Cyclophosphamide	10	0.94923	1.07249	1.10271	1.07815	1.12261	0.9527	1.03495	1.04964
1	MDAMB436	Cyclophosphamide	0.0045	0.97234	1.01102	1.12862	1.16493	1.00027	0.9806	1.00315	1.00438
1	MDAMB436	Cyclophosphamide	0.014	1.01733	0.96869	1.11939	1.15227	1.01926	1.0045	1.01015	1.01417
1	MDAMB436	Cyclophosphamide	0.04	0.89894	0.92361	1.00512	1.10606	1.05232	1.16316	1.01585	1.02222
1	MDAMB436	Cyclophosphamide	0.12	1.02477	1.04584	1.00979	1.02738	1.08993	1.07122	1.02013	1.0283
1	MDAMB436	Cyclophosphamide	0.37	1.19074	1.05683	0.98703	1.01195	1.0164	0.94	1.00788	1.01098
1	MDAMB436	Cyclophosphamide	1.1	1.04589	0.91588	1.01612	0.9904	1.03424	1.01781	1.00942	1.01314
1	MDAMB436	Cyclophosphamide	3.4	1.18358	1.06204	1.09453	0.99608	1.05148	1.02419	1.0309	1.04377
[truncated: 14,753 more rows]
