# Supplementary material for: An Unbiased Oncology Compound Screen to Identify Novel Combination Strategies
Source: Oxford University Press journal article supplement (doi:10.1158/1535-7163.mct-15-0843), 2016-03-16
Supplement: 15357163mct150843-sup-156849_1_supp_1_g2lr29.xlsx [file 15357163mct150843-sup-156849_1_supp_1_g2lr29.xlsx]

## Sheet: legend
Single agent data			Combination Data
BatchID	The screen was conducted in 3 batches in terms of cell line growth and drug batches. Batch 1 & 2 are part of the primary large screen while batch 3 is a partial repeat of selected drugs and served as a validation screen		BatchID	The screen was conducted in 3 batches in terms of cell line growth and drug batches. Batch 1 & 2 are part of the primary large screen while batch 3 is a partial repeat of selected drugs and served as a validation screen
cell_line	Name of cell lines		cell_line	Name of cell lines
drug_name	Name of drug		drugA_name	Name of drug A
Drug_concentration (µM)	Drug concentration used at micro molar concentration		drugB_name	Name of drug B
viability1	Each plate in the screen had up to 6 identifcal replicates to test for technical variability		combination_name	Name of the combination experiment
viability2			viability1	Each plate in the combination screen had up to 4 identifcal replicates to test for technical variability
viability3			viability2
viability4			viability3
viability5			viability4
viability6			mu/muMax	Growth rate relative to DMSO. Each plate had multiple DMSO controls which were used to establish the growth rate for the cells (µmax). The relative growth rate was computed as follows: mu/muMax=((Ln(median viability)/(muMax*96)) + 1) where 96 indicates the duration of the assay (96 hours).
mu/muMax	Growth rate relative to DMSO. Each plate had multiple DMSO controls which were used to establish the growth rate for the cells (µmax). The relative growth rate was computed as follows: mu/muMax=((Ln(median viability)/(muMax*96)) + 1) where 96 indicates the duration of the assay (96 hours).		X/X0	X/X0 is a normalization of mu/muMax to a scale of 0 to 1 where 0 indicates complete cell growth inhibition and 1 indicates no effect. X/X0 was implemented as follows: X/X0=EXP(LN(4)*((mu/muMax)-1)).
X/X0	X/X0 is a normalization of mu/muMax to a scale of 0 to 1 where 0 indicates complete cell growth inhibition and 1 indicates no effect. X/X0 was implemented as follows: X/X0=EXP(LN(4)*((mu/muMax)-1)).
